# Supplementary material for: Keratinocyte Detachment-Differentiation Connection Revisited, or Anoikis-Pityriasi Nexus Redux
Source: PLoS One. 2014 Jun 24;9(6):e100279. doi: 10.1371/journal.pone.0100279 (PMC4069014; doi:10.1371/journal.pone.0100279)
Supplement: Table S1 — Genes overexpressed in suspended keratinocytes. (XLSX) [file pone.0100279.s001.xlsx]

## Sheet: Susp_UP_Table
ID	SYMBOL	Gene Name	CYTOBAND	ENTREZ ID	OMIM DISEASE	KEGG PATHWAY
36512_at	AADAC	arylacetamide deacetylase (esterase)	3q21.3-q25.2	13
36364_at	ABAT	4-aminobutyrate aminotransferase	16p13.2	18	GABA-transaminase deficiency,	hsa00250:Alanine, aspartate and glutamate metabolism,hsa00280:Valine, leucine and isoleucine degradation,hsa00410:beta-Alanine metabolism,hsa00640:Propanoate metabolism,hsa00650:Butanoate metabolism,
31754_at	Abca12	ATP-binding cassette, sub-family A (ABC1), member 12	2q34	26154	Ichthyosis, harlequin,Ichthyosis, lamellar 2,	hsa02010:ABC transporters,
34017_s_at, 1896_s_at, 34384_at, 34016_s_at	ABCC1	ATP-binding cassette, sub-family C (CFTR/MRP), member 1	16p13.1	4363		hsa02010:ABC transporters,
41362_at	ABCG1	ATP-binding cassette, sub-family G (WHITE), member 1	21q22.3	9619		hsa02010:ABC transporters,
33309_at, 33310_at	ABHD5	abhydrolase domain containing 5	3p21	51099	Chanarin-Dorfman syndrome,
40155_at	ABLIM1	actin binding LIM protein 1	10q25	3983		hsa04360:Axon guidance,
39597_at	Ablim3	actin binding LIM protein family, member 3	5q33.1	22885		hsa04360:Axon guidance,
37163_at	ABTB2	ankyrin repeat and BTB (POZ) domain containing 2	11p13	25841
40415_at, 36417_s_at	Acaa1	acetyl-Coenzyme A acyltransferase 1	3p23-p22	30	Pseudo-Zellweger syndrome,	hsa00071:Fatty acid metabolism,hsa00280:Valine, leucine and isoleucine degradation,hsa01040:Biosynthesis of unsaturated fatty acids,hsa03320:PPAR signaling pathway,
41530_at	ACAA2 LOC648603	hypothetical LOC648603; acetyl-Coenzyme A acyltransferase 2	18q21.1 Xp11.23	10449 648603	Six new loci associated with blood low-density lipoprotein cholesterol, high-density lipoprotein cholesterol or triglycerides in humans,	hsa00062:Fatty acid elongation in mitochondria,hsa00071:Fatty acid metabolism,hsa00280:Valine, leucine and isoleucine degradation,
38376_at	ACADVL	acyl-Coenzyme A dehydrogenase, very long chain	17p13-p11	37	VLCAD deficiency,	hsa00071:Fatty acid metabolism,
37411_at	ACAP1	ArfGAP with coiled-coil, ankyrin repeat and PH domains 1	17p13.1	9744		hsa04144:Endocytosis,
41333_at	ACAP2	ArfGAP with coiled-coil, ankyrin repeat and PH domains 2	3q29	23527		hsa04144:Endocytosis,
40460_s_at, 40459_at	ACOX1	acyl-Coenzyme A oxidase 1, palmitoyl	17q24-q25 17q24-q25|17q25.1	51	Peroxisomal acyl-CoA oxidase deficiency,	hsa00071:Fatty acid metabolism,hsa00592:alpha-Linolenic acid metabolism,hsa01040:Biosynthesis of unsaturated fatty acids,hsa03320:PPAR signaling pathway,
677_s_at	acp5	acid phosphatase 5, tartrate resistant	19p13.3-p13.2	54	Genome-wide association analysis of susceptibility and clinical phenotype in multiple sclerosis,	hsa00740:Riboflavin metabolism,hsa04142:Lysosome,
40082_at	ACSL1	acyl-CoA synthetase long-chain family member 1	4q34-q35	2180		hsa00071:Fatty acid metabolism,hsa03320:PPAR signaling pathway,hsa04920:Adipocytokine signaling pathway,
35162_s_at	ACVR2A	activin A receptor, type IIA	2q22.3	92		hsa04060:Cytokine-cytokine receptor interaction,hsa04350:TGF-beta signaling pathway,
36269_at	Adamts3	ADAM metallopeptidase with thrombospondin type 1 motif, 3	4q13.3	9508
36051_s_at	add2	adducin 2 (beta)	2p14-p13	119
39045_at	adipor2	adiponectin receptor 2	12p13.31	79602		hsa04920:Adipocytokine signaling pathway,
34777_at	ADM	adrenomedullin	11p15.4	133
39037_at	AFF1	AF4/FMR2 family, member 1	4q21	4299
36997_at	ak1	adenylate kinase 1	9q34.1	203	Hemolytic anemia due to adenylate kinase deficiency,	hsa00230:Purine metabolism,
735_s_at, 554_at	AKAP13	A kinase (PRKA) anchor protein 13	15q24-q25	11214
37886_at	akap8l	A kinase (PRKA) anchor protein 8-like	19p13.12	26993
36589_at	AKR1B1	aldo-keto reductase family 1, member B1 (aldose reductase)	7q35	231		hsa00040:Pentose and glucuronate interconversions,hsa00051:Fructose and mannose metabolism,hsa00052:Galactose metabolism,hsa00561:Glycerolipid metabolism,hsa00620:Pyruvate metabolism,
37956_at	ALDH3B2	aldehyde dehydrogenase 3 family, member B2	11q13	222		hsa00010:Glycolysis / Gluconeogenesis,hsa00340:Histidine metabolism,hsa00350:Tyrosine metabolism,hsa00360:Phenylalanine metabolism,hsa00980:Metabolism of xenobiotics by cytochrome P450,hsa00982:Drug metabolism,
41790_at	ALDH5A1	aldehyde dehydrogenase 5 family, member A1	6p22.2-p22.3	7915	Succinic semialdehyde dehydrogenase deficiency,	hsa00250:Alanine, aspartate and glutamate metabolism,hsa00650:Butanoate metabolism,
33029_at	ALOX12B	arachidonate 12-lipoxygenase, 12R type	17p13.1	242	Ichthyosiform erythroderma, congenital, nonbullous, 1,	hsa00590:Arachidonic acid metabolism,
32940_at	AMMECR1	Alport syndrome, mental retardation, midface hypoplasia and elliptocytosis chromosomal region gene 1	Xq22.3	9949	Alport syndrome, mental retardation, midface hypoplasia, and elliptocytosis,
38842_at	Amotl2	angiomotin like 2	3q21-q22	51421
38463_s_at	AMPD3	adenosine monophosphate deaminase (isoform E)	11p15	272	AMP deaminase deficiency, erythrocytic,	hsa00230:Purine metabolism,
36965_at, 36967_g_at	ANK3	ankyrin 3, node of Ranvier (ankyrin G)	10q21	288	Collaborative genome-wide association analysis supports a role for ANK3 and CACNA1C in bipolar disorder,
38683_s_at	ANKHD1 Ankhd1-Eif4ebp3 Eif4ebp3	ankyrin repeat and KH domain containing 1; ANKHD1-EIF4EBP3 readthrough transcript; eukaryotic translation initiation factor 4E binding protein 3	5q31.3	404734 54882 8637
39669_at	ANXA9	annexin A9	1q21	8416
1101_at	APBB1	amyloid beta (A4) precursor protein-binding, family B, member 1 (Fe65)	11p15	322		hsa05010:Alzheimer's disease,
39249_at, 39248_at	AQP3	aquaporin 3 (Gill blood group)	9p13	360	Blood group GIL,
34435_at	AQP9	aquaporin 9	15q22.1-q22.2	366	Glycerol release during exercise, defective,
39224_at	Arap2	ArfGAP with RhoGAP domain, ankyrin repeat and PH domain 2	4p14	116984	Genome-wide association scan identifies candidate polymorphisms associated with differential response to anti-TNF treatment in Rheumatoid Arthritis,	hsa04144:Endocytosis,
1962_at	arg1	arginase, liver	6q23	383	Argininemia,	hsa00330:Arginine and proline metabolism,
41455_at	ARHGAP32	Rho GTPase-activating protein	11q24-q25	9743
36537_at	ARHGEF18	Rho/Rac guanine nucleotide exchange factor (GEF) 18	19p13.3	23370
36524_at	ARHGEF4	Rho guanine nucleotide exchange factor (GEF) 4	2q22	50649		hsa04810:Regulation of actin cytoskeleton,
41690_at	ARID5B	AT rich interactive domain 5B (MRF1-like)	10q21.2	84159
33796_at	ARL4A	ADP-ribosylation factor-like 4A	7p21-p15.3	10124
40308_at	atad2b	ATPase family, AAA domain containing 2B	2p24.1-p23.3	54454
287_at	atf3	activating transcription factor 3	1q32.3	467
37146_at	Atg2a	ATG2 autophagy related 2 homolog A (S. cerevisiae)	11q13.1	23130
40431_at	ATMIN	ATM interactor	16q23.2	23300
37415_at	ATP10B	ATPase, class V, type 10B	5q34	23120
32482_at	Atp12a	ATPase, H+/K+ transporting, nongastric, alpha polypeptide	13q12.12 13q12.12|13q12.1-q12.3	479		hsa00190:Oxidative phosphorylation,
37669_s_at	Atp1b1	ATPase, Na+/K+ transporting, beta 1 polypeptide	1q24	481	Blood pressure regulation QTL,	hsa04260:Cardiac muscle contraction,hsa04960:Aldosterone-regulated sodium reabsorption,
40913_at	atp2b4	ATPase, Ca++ transporting, plasma membrane 4	1q32.1	493		hsa04020:Calcium signaling pathway,
40298_at	ATP2C2	ATPase, Ca++ transporting, type 2C, member 2	16q24.1	9914
35770_at	ATP6AP1	ATPase, H+ transporting, lysosomal accessory protein 1	Xq28	537		hsa00190:Oxidative phosphorylation,hsa04142:Lysosome,hsa05110:Vibrio cholerae infection,hsa05120:Epithelial cell signaling in Helicobacter pylori infection,
39326_at	ATP6V0A1	ATPase, H+ transporting, lysosomal V0 subunit a1	17q21	535		hsa00190:Oxidative phosphorylation,hsa04142:Lysosome,hsa05110:Vibrio cholerae infection,hsa05120:Epithelial cell signaling in Helicobacter pylori infection,
36994_at	ATP6V0C	ATPase, H+ transporting, lysosomal 16kDa, V0 subunit c	16p13.3	527		hsa00190:Oxidative phosphorylation,hsa04142:Lysosome,hsa05110:Vibrio cholerae infection,hsa05120:Epithelial cell signaling in Helicobacter pylori infection,
34889_at, 34890_at	Atp6v1a	ATPase, H+ transporting, lysosomal 70kDa, V1 subunit A	3q13.2-q13.31	523		hsa00190:Oxidative phosphorylation,hsa05110:Vibrio cholerae infection,hsa05120:Epithelial cell signaling in Helicobacter pylori infection,
40568_at	atp6v1b2	ATPase, H+ transporting, lysosomal 56/58kDa, V1 subunit B2	8p22-p21	526		hsa00190:Oxidative phosphorylation,hsa05110:Vibrio cholerae infection,hsa05120:Epithelial cell signaling in Helicobacter pylori infection,
36142_at	ATXN1	ataxin 1	6p23	6310	Spinocerebellar ataxia-1,
35834_at	AZGP1 AZGP1P1	alpha-2-glycoprotein 1, zinc-binding pseudogene 1; alpha-2-glycoprotein 1, zinc-binding	7q22.1	563 646282
35944_at	B3GALT4	UDP-Gal:betaGlcNAc beta 1,3-galactosyltransferase, polypeptide 4	6p21.3	8705	Newly identified loci that influence lipid concentrations and risk of coronary artery disease,	hsa00604:Glycosphingolipid biosynthesis,
31895_at	Bach1	BTB and CNC homology 1, basic leucine zipper transcription factor 1	21q22.11	571
34798_at	bag1	BCL2-associated athanogene	9p12	573
37760_at	BAIAP2	BAI1-associated protein 2	17q25	10458		hsa04520:Adherens junction,hsa04810:Regulation of actin cytoskeleton,
35425_at	BARX2	BARX homeobox 2	11q25	8538
40091_at	BCL6	B-cell CLL/lymphoma 6	3q27	604	Lymphoma, B-cell,
37211_at	BDH1	3-hydroxybutyrate dehydrogenase, type 1	3q29	622		hsa00072:Synthesis and degradation of ketone bodies,hsa00650:Butanoate metabolism,
40879_at	BICD2	bicaudal D homolog 2 (Drosophila)	9q22.31	23299
394_at, 37700_at	BLMH	bleomycin hydrolase	17q11.2	642	Alzheimer disease, susceptibility to,
38242_at	BLNK	B-cell linker	10q23.2-q23.33	29760	Hypoglobulinemia and absent B cells,	hsa04662:B cell receptor signaling pathway,hsa05340:Primary immunodeficiency,
1113_at, 40367_at	bmp2	bone morphogenetic protein 2	20p12	650	HFE hemochromatosis, modifier of,Many sequence variants affecting diversity of adult human height,Six new loci associated with body mass index highlight a neuronal influence on body weight regulation,	hsa04060:Cytokine-cytokine receptor interaction,hsa04340:Hedgehog signaling pathway,hsa04350:TGF-beta signaling pathway,hsa05200:Pathways in cancer,hsa05217:Basal cell carcinoma,
37170_at	bmp2k	BMP2 inducible kinase	4q21.21	55589
38010_at	BNIP3	BCL2/adenovirus E1B 19kDa interacting protein 3	10q26.3	664
39436_at	BNIP3L	BCL2/adenovirus E1B 19kDa interacting protein 3-like	8p21	665
39894_f_at, 41699_f_at	BRD1	bromodomain containing 1	22q13.33	23774
39093_s_at	brd4	bromodomain containing 4	19p13.1	23476
37294_at	btg1	B-cell translocation gene 1, anti-proliferative	12q22	694
36634_at	BTG2	BTG family, member 2	1q32	7832
38652_at	C10orf26	chromosome 10 open reading frame 26	10q24.32	54838
36551_at	C12orf29	chromosome 12 open reading frame 29	12q21.32	91298
36093_at	c12orf51	chromosome 12 open reading frame 51	12q24.13	283450
31579_at	C1orf46	chromosome 1 open reading frame 46	1q21.3	388699
38712_at	C1orf9	chromosome 1 open reading frame 9	1q24	51430
36934_at	C20orf111	chromosome 20 open reading frame 111	20q13.11	51526
41047_at	C9orf16	chromosome 9 open reading frame 16	9q34.1	79095
40095_at	CA2	carbonic anhydrase II	8q22	760	Osteopetrosis, autosomal recessive 3, with renal tubular acidosis,Renal tubular acidosis-osteopetrosis syndrome,	hsa00910:Nitrogen metabolism,
37157_at	CALB2	calbindin 2	16q22.2	794
38721_at	CALCOCO1	calcium binding and coiled-coil domain 1	12q13.13	57658
41144_g_at, 41288_at	CALM1 CALM2 CALM3	calmodulin 3 (phosphorylase kinase, delta); calmodulin 2 (phosphorylase kinase, delta); calmodulin 1 (phosphorylase kinase, delta)	14q24-q31 19q13.2-q13.3 2p21	801 805 808		hsa04020:Calcium signaling pathway,hsa04070:Phosphatidylinositol signaling system,hsa04114:Oocyte meiosis,hsa04270:Vascular smooth muscle contraction,hsa04720:Long-term potentiation,hsa04722:Neurotrophin signaling pathway,hsa04740:Olfactory transduction,hsa04910:Insulin signaling pathway,hsa04912:GnRH signaling pathway,hsa04916:Melanogenesis,hsa05010:Alzheimer's disease,hsa05214:Glioma,
34183_at	ccdc69	coiled-coil domain containing 69	5q33.1	26112
2021_s_at, 41060_at	CCNE1	cyclin E1	19q12	898		hsa04110:Cell cycle,hsa04114:Oocyte meiosis,hsa04115:p53 signaling pathway,hsa05200:Pathways in cancer,hsa05215:Prostate cancer,hsa05222:Small cell lung cancer,
266_s_at	Cd24 CD24L4	CD24 molecule; CD24 molecule-like 4	6q21 Yq11.222	100133941 938	Multiple sclerosis, susceptibility to,
36656_at	CD36	CD36 molecule (thrombospondin receptor)	7q11.2	948	Coronary heart disease, susceptibility to, 7,Macrothrombocytopenia,Malaria, cerebral, reduced risk of,Malaria, cerebral, susceptibility to,Platelet glycoprotein IV deficiency,	hsa03320:PPAR signaling pathway,hsa04512:ECM-receptor interaction,hsa04640:Hematopoietic cell lineage,hsa04920:Adipocytokine signaling pathway,
39695_at	Cd55	CD55 molecule, decay accelerating factor for complement (Cromer blood group)	1q32	1604	Blood group Cromer,	hsa04610:Complement and coagulation cascades,hsa04640:Hematopoietic cell lineage,hsa05416:Viral myocarditis,
33390_at	CD68	CD68 molecule	17p13	968		hsa04142:Lysosome,
1274_s_at	CDC34	cell division cycle 34 homolog (S. cerevisiae)	19p13.3	997		hsa04120:Ubiquitin mediated proteolysis,
39417_at	CDK19	cell division cycle 2-like 6 (CDK8-like)	6q21	23097
796_i_at	CDKL1	cyclin-dependent kinase-like 1 (CDC2-related kinase)	14q22.1	8814
36707_s_at	CDKL5	cyclin-dependent kinase-like 5	Xp22	6792	Epileptic encephalopathy, early infantile, 2,Infantile spasm syndrome, X-linked,Rett syndrome, atypical,
2034_s_at, 33847_s_at, 33848_r_at	CDKN1B	cyclin-dependent kinase inhibitor 1B (p27, Kip1)	12p13.1-p12	1027	Multiple endocrine neoplasia, type IV,	hsa04012:ErbB signaling pathway,hsa04110:Cell cycle,hsa05200:Pathways in cancer,hsa05215:Prostate cancer,hsa05220:Chronic myeloid leukemia,hsa05222:Small cell lung cancer,
38673_s_at, 1787_at, 39545_at	CDKN1C	cyclin-dependent kinase inhibitor 1C (p57, Kip2)	11p15.5	1028	Beckwith-Wiedemann syndrome,	hsa04110:Cell cycle,
34624_at, 1607_at	cdkn2b	cyclin-dependent kinase inhibitor 2B (p15, inhibits CDK4)	9p21	1030	A common variant on chromosome 9p21 affects the risk of myocardial infarction,A genome-wide association study of type 2 diabetes in Finns detects multiple susceptibility variants,Adiposity-related heterogeneity in patterns of type 2 diabetes susceptibility observed in genome wide association data,Genome-wide association analysis identifies loci for type 2 diabetes and triglyceride levels,Genome-w…	hsa04110:Cell cycle,hsa04350:TGF-beta signaling pathway,hsa05200:Pathways in cancer,hsa05222:Small cell lung cancer,
31781_at	CDRT1	CMT1A duplicated region transcript 1	17p12	374286
40218_at, 40217_s_at	CDS1	CDP-diacylglycerol synthase (phosphatidate cytidylyltransferase) 1	4q21.23	1040		hsa00564:Glycerophospholipid metabolism,hsa04070:Phosphatidylinositol signaling system,
39991_at	CDSN	corneodesmosin	6p21.3	1041	Hypotrichosis simplex of scalp,
32111_at	CDYL	chromodomain protein, Y-like	6p25.1	9425
1582_at	CEACAM5	carcinoembryonic antigen-related cell adhesion molecule 5	19q13.1-q13.2	1048
36105_at	Ceacam6	carcinoembryonic antigen-related cell adhesion molecule 6 (non-specific cross reacting antigen)	19q13.2	4680
32550_r_at	CEBPA	CCAAT/enhancer binding protein (C/EBP), alpha	19q13.1	1050	Leukemia, acute myeloid,	hsa05200:Pathways in cancer,hsa05221:Acute myeloid leukemia,
38354_at	CEBPB	CCAAT/enhancer binding protein (C/EBP), beta	20q13.1	1051
1052_s_at	cebpd	CCAAT/enhancer binding protein (C/EBP), delta	8p11.2-p11.1	1052
39219_at	CEBPG	CCAAT/enhancer binding protein (C/EBP), gamma	19q13.11	1054
39176_f_at	Cel	carboxyl ester lipase (bile salt-stimulated lipase)	9q34.3	1056	Maturity-onset diabetes of the young, type VIII,	hsa00100:Steroid biosynthesis,hsa00561:Glycerolipid metabolism,
1868_g_at, 1867_at	CFLAR	CASP8 and FADD-like apoptosis regulator	2q33-q34	8837		hsa04210:Apoptosis,
39352_at	cga	glycoprotein hormones, alpha polypeptide	6q12-q21	1081		hsa04080:Neuroactive ligand-receptor interaction,hsa04912:GnRH signaling pathway,hsa05320:Autoimmune thyroid disease,
33114_f_at, 33113_at	Cited2	Cbp/p300-interacting transactivator, with Glu/Asp-rich carboxy-terminal domain, 2	6q23.3	10370
32529_at	Ckap4	cytoskeleton-associated protein 4	12q23.3	10970
40880_r_at	Clcn3	chloride channel 3	4q33	1182
34024_at	Clcn5	chloride channel 5	Xp11.23	1184	Dent disease,Hypophosphatemia, type III,Hypophosphatemic rickets,hypophosphatemic rickets, X-linked recessive,Nephrolithiasis, type I,Proteinuria, low molecular weight, with hypercalciuric nephrocalcinosis,
35276_at	CLDN4	claudin 4	7q11.23	1364		hsa04514:Cell adhesion molecules (CAMs),hsa04530:Tight junction,hsa04670:Leukocyte transendothelial migration,
38690_at	CLDND1	claudin domain containing 1	3q12.1	56650
34194_at	Clic5	chloride intracellular channel 5	6p21.1-p12.1	53405
34350_at	CLIP1	CAP-GLY domain containing linker protein 1	12q24.3	6249
32833_at, 292_s_at	clk1	CDC-like kinase 1	2q33	1195
37453_at	clpX	ClpX caseinolytic peptidase X homolog (E. coli)	15q22.2-q22.3	10845
39307_s_at, 32522_f_at, 32523_at	Cltb	clathrin, light chain (Lcb)	4q2-q3 4q2-q3|5q35	1212		hsa04142:Lysosome,hsa04144:Endocytosis,hsa05016:Huntington's disease,
33861_at	CNOT2	CCR4-NOT transcription complex, subunit 2	12q15	4848		hsa03018:RNA degradation,
34931_at	CPEB3	cytoplasmic polyadenylation element binding protein 3	10q23.32	22849
36708_at	CPM	carboxypeptidase M	12q14.3	1368
1057_at, 41783_at	crabp2	cellular retinoic acid binding protein 2	1q21.3	1382
33831_at	CREBBP	CREB binding protein	16p13.3	1387	Rubenstein-Taybi syndrome,	hsa04110:Cell cycle,hsa04310:Wnt signaling pathway,hsa04330:Notch signaling pathway,hsa04350:TGF-beta signaling pathway,hsa04520:Adherens junction,hsa04630:Jak-STAT signaling pathway,hsa04720:Long-term potentiation,hsa04916:Melanogenesis,hsa05016:Huntington's disease,hsa05200:Pathways in cancer,hsa05211:Renal cell carcinoma,hsa05215:Prostate cancer,
35311_at	CREG1	cellular repressor of E1A-stimulated genes 1	1q24	8804
415_at, 33524_at, 35301_at	CRKL	v-crk sarcoma virus CT10 oncogene homolog (avian)-like	22q11 22q11|22q11.21	1399		hsa04010:MAPK signaling pathway,hsa04012:ErbB signaling pathway,hsa04062:Chemokine signaling pathway,hsa04510:Focal adhesion,hsa04666:Fc gamma R-mediated phagocytosis,hsa04722:Neurotrophin signaling pathway,hsa04810:Regulation of actin cytoskeleton,hsa04910:Insulin signaling pathway,hsa05200:Pathways in cancer,hsa05211:Renal cell carcinoma,hsa05220:Chronic myeloid leukemia,
32242_at, 32243_g_at	CRYAB	crystallin, alpha B	11q22.3-q23.1	1410	Cataract, posterior polar 2,Myopathy, cardioskeletal, desmin-related, with cataract,
41274_at	CRYBG3	beta-gamma crystallin domain containing 3	3q11.2	131544
37493_at	CSF2RB	colony stimulating factor 2 receptor, beta, low-affinity (granulocyte-macrophage)	22q13.1	1439	Pulmonary alveolar proteinosis,	hsa04060:Cytokine-cytokine receptor interaction,hsa04210:Apoptosis,hsa04630:Jak-STAT signaling pathway,
725_i_at	CSHL1	chorionic somatomammotropin hormone-like 1	17q24.2	1444
37629_at	csnk2a2	casein kinase 2, alpha prime polypeptide	16q21	1459		hsa04310:Wnt signaling pathway,hsa04520:Adherens junction,hsa04530:Tight junction,
33128_s_at	CST6	cystatin E/M	11q13	1474
39581_at	cstA	cystatin A (stefin A)	3q21	1475
35816_at	Cstb	cystatin B (stefin B)	21q22.3	1476	Epilepsy, progressive myoclonic 1,
35979_at	Ctdp1	CTD (carboxy-terminal domain, RNA polymerase II, polypeptide A) phosphatase, subunit 1	18q23	9150	Congenital cataracts, facial dysmorphism, and neuropathy,
36566_at	CTNS	cystinosis, nephropathic	17p13	1497	Cystinosis, atypical nephropathic,Cystinosis, late-onset juvenile or adolescent nephropathic,Cystinosis, nephropathic,Cystinosis, ocular nonnephropathic,	hsa04142:Lysosome,
39062_at	CTSA	cathepsin A	20q13.1	5476	Galactosialidosis,	hsa04142:Lysosome,hsa04614:Renin-angiotensin system,
239_at	CTSD	cathepsin D	11p15.5	1509	Ceroid lipofuscinosis, neuronal, 10,	hsa04142:Lysosome,
37021_at	CTSH	cathepsin H	15q24-q25	1512	Meta-analysis of genome-wide association study data identifies additional type 1 diabetes risk loci,	hsa04142:Lysosome,
40717_at	CTSL2	cathepsin L2	9q22.2	1515		hsa04142:Lysosome,
35329_at	CYB5R1	cytochrome b5 reductase 1	1p36.13-q41	51706		hsa00520:Amino sugar and nucleotide sugar metabolism,
1025_g_at, 36767_at, 1024_at	CYP1A1	cytochrome P450, family 1, subfamily A, polypeptide 1	15q24.1	1543		hsa00140:Steroid hormone biosynthesis,hsa00380:Tryptophan metabolism,hsa00830:Retinol metabolism,hsa00980:Metabolism of xenobiotics by cytochrome P450,
859_at, 40071_at	CYP1B1	cytochrome P450, family 1, subfamily B, polypeptide 1	2p21	1545	Glaucoma 3A, primary congenital,Glaucoma, early-onset, digenic,Glaucoma, primary open angle, adult-onset,Glaucoma, primary open angle, juvenile-onset,Peters anomaly,	hsa00140:Steroid hormone biosynthesis,hsa00380:Tryptophan metabolism,hsa00980:Metabolism of xenobiotics by cytochrome P450,
37124_i_at	CYP3A5	cytochrome P450, family 3, subfamily A, polypeptide 5	7q21.1	1577	Hypertension, salt-sensitive essential, susceptibility to,	hsa00140:Steroid hormone biosynthesis,hsa00591:Linoleic acid metabolism,hsa00830:Retinol metabolism,hsa00980:Metabolism of xenobiotics by cytochrome P450,hsa00982:Drug metabolism,hsa00983:Drug metabolism,
35492_at	CYP4F12 LOC388514	similar to cytochrome P450, family 4, subfamily F, polypeptide 12; cytochrome P450, family 4, subfamily F, polypeptide 12	19p13.1 19p13.12	388514 66002
38666_at	Cyth1	cytohesin 1	17q25	9267
33753_at	DAAM1	dishevelled associated activator of morphogenesis 1	14q23.1	23002		hsa04310:Wnt signaling pathway,
37692_at	DBI	diazepam binding inhibitor (GABA receptor modulator, acyl-Coenzyme A binding protein)	2q12-q21	1622		hsa03320:PPAR signaling pathway,
39660_at	DEFB1	defensin, beta 1	8p23.2-p23.1	1672
32464_at	DEFB4A	defensin, beta 4	8p23.1-p22	1673	Crohn disease, susceptibility to,
33889_s_at	DGCR2	DiGeorge syndrome critical region gene 2	22q11.21	9993
744_at	DHX8	DEAH (Asp-Glu-Ala-His) box polypeptide 8	17q21.31	1659		hsa03040:Spliceosome,
31902_at	dio2	deiodinase, iodothyronine, type II	14q24.2-q24.3	1734
41134_at	DLGAP4	discs, large (Drosophila) homolog-associated protein 4	20q11.23	22839
41087_at	DLX5	distal-less homeobox 5	7q22	1749
35466_at	DNAJB12	DnaJ (Hsp40) homolog, subfamily B, member 12	10q22.1	54788
38632_at	DNAJB5	DnaJ (Hsp40) homolog, subfamily B, member 5	9p13.3	25822
41234_at	DNAJB6	DnaJ (Hsp40) homolog, subfamily B, member 6	7q36.3	10049
31704_at	DNASE1L2	deoxyribonuclease I-like 2	16p13.3	1775
36844_at	dock3	dedicator of cytokinesis 3	3p21.31	1795
40612_at	dopey1	dopey family member 1	6q15	23033
37827_r_at	Dopey2	dopey family member 2	21q22.2	9980
34619_at	DSC1	desmocollin 1	18q12.2 18q12.2|18q12.1	1823
39302_at	DSC2	desmocollin 2	18q12.1	1824	Arrhythmogenic right ventricular dysplasia, familial, 11,	hsa05412:Arrhythmogenic right ventricular cardiomyopathy (ARVC),
39586_at	DSG1	desmoglein 1	18q12.1	1828	Keratosis palmoplantaris striata I,
36133_at	dsp	desmoplakin	6p24	1832	Arrhythmogenic right ventricular dysplasia 8,Dilated cardiomyopathy with woolly hair and keratoderma,Epidermolysis bullosa, lethal acantholytic,Keratosis palmoplantaris striata II,Skin fragility-woolly hair syndrome,	hsa05412:Arrhythmogenic right ventricular cardiomyopathy (ARVC),
1005_at	DUSP1	dual specificity phosphatase 1	5q34	1843		hsa04010:MAPK signaling pathway,
38272_at	Dusp14	dual specificity phosphatase 14	17q12	11072		hsa04010:MAPK signaling pathway,
1292_at	dusp2	dual specificity phosphatase 2	2q11	1844		hsa04010:MAPK signaling pathway,
1561_at, 1562_g_at	DUSP8	dual specificity phosphatase 8	11p15.5	1850		hsa04010:MAPK signaling pathway,
1512_at, 827_s_at, 36946_at	DYRK1A	dual-specificity tyrosine-(Y)-phosphorylation regulated kinase 1A	21q22.13	1859
35174_i_at	EEF1A2	eukaryotic translation elongation factor 1 alpha 2	20q13.3	1917
40425_at	EFNA1	ephrin-A1	1q21-q22	1942		hsa04360:Axon guidance,
898_s_at	EFNA3	ephrin-A3	1q21-q22	1944		hsa04360:Axon guidance,
38109_at	Egfl8	EGF-like-domain, multiple 8	6p21.32	80864
37863_at	Egr2	early growth response 2	10q21.1	1959	Charcot-Marie-Tooth disease, type 1D,Dejerine-Sottas neuropathy,Neuropathy, congenital hypomyelinating, 1,
40375_at	EGR3	early growth response 3	8p23-p21	1960
35263_at	Eif4ebp2	eukaryotic translation initiation factor 4E binding protein 2	10q21-q22	1979
167_at	EIF5	eukaryotic translation initiation factor 5	14q32.32	1983
31913_at	ELF5	E74-like factor 5 (ets domain transcription factor)	11p13-p12	2001
40606_at	ELL2	elongation factor, RNA polymerase II, 2	5q15	22936
40455_at	ENDOD1	endonuclease domain containing 1	11q21	23052		hsa04210:Apoptosis,
37093_at	Endou	26 serine protease	12q13.1	8909
33896_at, 551_at	EP300	E1A binding protein p300	22q13.2	2033	Colorectal cancer,Rubinstein-Taybi syndrome,	hsa04110:Cell cycle,hsa04310:Wnt signaling pathway,hsa04330:Notch signaling pathway,hsa04350:TGF-beta signaling pathway,hsa04520:Adherens junction,hsa04630:Jak-STAT signaling pathway,hsa04720:Long-term potentiation,hsa04916:Melanogenesis,hsa05016:Huntington's disease,hsa05200:Pathways in cancer,hsa05211:Renal cell carcinoma,hsa05215:Prostate cancer,
1606_at	EPHA4	EPH receptor A4	2q36.1	2043		hsa04360:Axon guidance,
1438_at	EPHB3	EPH receptor B3	3q21-qter	2049		hsa04360:Axon guidance,
39930_at	EPHB6	EPH receptor B6	7q33-q35	2051		hsa04360:Axon guidance,
1901_s_at, 1802_s_at, 33218_at	Erbb2	v-erb-b2 erythroblastic leukemia viral oncogene homolog 2, neuro/glioblastoma derived oncogene homolog (avian)	17q11.2-q12 17q11.2-q12|17q21.1	2064	Adenocarcinoma of lung, somatic,Gastric cancer, somatic,Glioblastoma, somatic,Ovarian cancer, somatic,	hsa04012:ErbB signaling pathway,hsa04020:Calcium signaling pathway,hsa04510:Focal adhesion,hsa04520:Adherens junction,hsa05200:Pathways in cancer,hsa05212:Pancreatic cancer,hsa05213:Endometrial cancer,hsa05215:Prostate cancer,hsa05219:Bladder cancer,hsa05223:Non-small cell lung cancer,
33639_g_at, 1723_g_at, 32787_at, 1742_at, 1585_at, 2089_s_at	Erbb3	v-erb-b2 erythroblastic leukemia viral oncogene homolog 3 (avian)	12q13	2065	A novel susceptibility locus for type 1 diabetes on Chr12q13 identified by a genome-wide association study,Genome-wide association study of 14,000 cases of seven common diseases and 3,000 shared controls,Lethal congenital contractural syndrome 2,lethal congenital contracture syndrome type 2,Meta-analysis of genome-wide association study data identifies additional type 1 diabetes risk loci,Robust …	hsa04012:ErbB signaling pathway,hsa04020:Calcium signaling pathway,hsa04144:Endocytosis,
34476_r_at	ereg	epiregulin	4q13.3	2069		hsa04012:ErbB signaling pathway,
33494_at	Etfdh	electron-transferring-flavoprotein dehydrogenase	4q32-q35	2110	Glutaricaciduria, type IIC,
1519_at, 38739_at	Ets2	v-ets erythroblastosis virus E26 oncogene homolog 2 (avian)	21q22.3	2114		hsa04320:Dorso-ventral axis formation,
39569_at	evpl	envoplakin	17q25	2125
39625_at, 35579_at	EXPH5	exophilin 5	11q22.3	23086
39799_at	Fabp5 Fabp5l2 FABP5L7 FABP5L8 FABP5L9	fatty acid binding protein 5-like 2; fatty acid binding protein 5 (psoriasis-associated); fatty acid binding protein 5-like 8; fatty acid binding protein 5-like 7; fatty acid binding protein 5-like 9	11q12.1 13q14.3 15q25.2 15q25.3 8q21.13	2171 642956 728641 728729 729163		hsa03320:PPAR signaling pathway,
40175_at	FAM131A	family with sequence similarity 131, member A	3q27.1	131408
38423_at	fam134c	family with sequence similarity 134, member C	17q21.31	162427
38318_at	FAM8A1	family with sequence similarity 8, member A1	6p22-p23	51439
35188_at	FARP2	FERM, RhoGEF and pleckstrin domain protein 2	2q37.3	9855		hsa04520:Adherens junction,
37818_at	Fbxo46	F-box protein 46	19q13.3	23403
35346_at	fem1b	fem-1 homolog b (C. elegans)	15q22	10116
39976_at	FEM1C	fem-1 homolog c (C. elegans)	5q22	56929
33101_g_at	FETUB	fetuin B	3q27	26998
31897_at	FILIP1L	filamin A interacting protein 1-like	3q12.1	11259
31826_at	FKBP15	FK506 binding protein 15, 133kDa	9q32	23307
31542_at	Flg	filaggrin	1q21.3	2312	Atopic dermatitis, susceptibility to,Dermatitis, atopic 2,Dermatitis, atopic, susceptibility to,Ichthyosis vulgaris,
40468_at	Fnbp1	formin binding protein 1	9q34	23048
35802_at	FNBP4	formin binding protein 4	11p11.2	23360
1916_s_at, 1915_s_at	FOS	v-fos FBJ murine osteosarcoma viral oncogene homolog	14q24.3	2353		hsa04010:MAPK signaling pathway,hsa04620:Toll-like receptor signaling pathway,hsa04660:T cell receptor signaling pathway,hsa04662:B cell receptor signaling pathway,hsa05200:Pathways in cancer,hsa05210:Colorectal cancer,
40268_at	Fosl2	FOS-like antigen 2	2p23.3	2355
41027_at	FOXC1	forkhead box C1	6p25	2296	Anterior segment mesenchymal dysgenesis,Axenfeld anomaly,Axenfeld-Rieger syndrome, type 3,Iridogoniodysgenesis,Iridogoniodysgenesis, type 1,Iris hypoplasia and glaucoma,Rieger anomaly,Rieger or Axenfeld anomalies,
41649_at	FOXJ2	forkhead box J2	12p13.31	55810
31980_at	FOXN1	forkhead box N1	17q11-q12	8456	T-cell immunodeficiency, congenital alopecia, and nail dystrophy,
41000_at, 1535_at	foxn3	forkhead box N3	14q31.3	1112
34740_at	FOXO3 foxo3b	forkhead box O3; forkhead box O3B pseudogene	17p11 6q21	2309 2310	Genome-wide association analysis of susceptibility and clinical phenotype in multiple sclerosis,	hsa04062:Chemokine signaling pathway,hsa04722:Neurotrophin signaling pathway,hsa05213:Endometrial cancer,hsa05223:Non-small cell lung cancer,
40171_at	Frat2	frequently rearranged in advanced T-cell lymphomas 2	10q24.1	23401		hsa04310:Wnt signaling pathway,
38336_at	FRMD4B	FERM domain containing 4B	3p14.1	23150
36401_at	FRMPD1	FERM and PDZ domain containing 1	9p13.2	22844
1529_at, 1530_g_at	FRY	furry homolog (Drosophila)	13q13.1	10129
35338_at	Furin	furin (paired basic amino acid cleaving enzyme)	15q26.1	5045
38495_s_at, 36290_s_at	FUT3	fucosyltransferase 3 (galactoside 3(4)-L-fucosyltransferase, Lewis blood group)	19p13.3	2525	Blood group, Lewis,	hsa00601:Glycosphingolipid biosynthesis,
1249_at, 32979_at	gab1	GRB2-associated binding protein 1	4q31.21	2549		hsa04012:ErbB signaling pathway,hsa04722:Neurotrophin signaling pathway,hsa05211:Renal cell carcinoma,
35253_at	GAB2	GRB2-associated binding protein 2	11q14.1	9846	GAB2 alleles modify Alzheimer's risk in APOE epsilon4 carriers,	hsa04664:Fc epsilon RI signaling pathway,hsa04666:Fc gamma R-mediated phagocytosis,hsa05220:Chronic myeloid leukemia,
35785_at	GABARAPL1 GABARAPL3	GABA(A) receptors associated protein like 3 (pseudogene); GABA(A) receptor-associated protein like 1	12p13.2 15q26.1	23710 23766		hsa04140:Regulation of autophagy,
35767_at	GABARAPL2	GABA(A) receptor-associated protein-like 2	16q22.3-q24.1	11345		hsa04140:Regulation of autophagy,
34280_at	Gabre	gamma-aminobutyric acid (GABA) A receptor, epsilon	Xq28	2564		hsa04080:Neuroactive ligand-receptor interaction,
1911_s_at	GADD45A	growth arrest and DNA-damage-inducible, alpha	1p31.2-p31.1	1647		hsa04010:MAPK signaling pathway,hsa04110:Cell cycle,hsa04115:p53 signaling pathway,
39822_s_at, 39821_s_at	Gadd45b	growth arrest and DNA-damage-inducible, beta	19p13.3	4616		hsa04010:MAPK signaling pathway,hsa04110:Cell cycle,hsa04115:p53 signaling pathway,
39154_at	Gadd45g	growth arrest and DNA-damage-inducible, gamma	9q22.1-q22.2	10912	A Genome-Wide Association Study Identifies Protein Quantitative Trait Loci (pQTLs),	hsa04010:MAPK signaling pathway,hsa04110:Cell cycle,hsa04115:p53 signaling pathway,
38041_at	GALNT1 GALNT13	UDP-N-acetyl-alpha-D-galactosamine:polypeptide N-acetylgalactosaminyltransferase 13 (GalNAc-T13); UDP-N-acetyl-alpha-D-galactosamine:polypeptide N-acetylgalactosaminyltransferase 1 (GalNAc-T1)	18q12.1 2q23.3-q24.1	114805 2589	Genetic correlates of longevity and selected age-related phenotypes: a genome-wide association study in the Framingham Study,	hsa00512:O-Glycan biosynthesis,
40801_at	GAPVD1	GTPase activating protein and VPS9 domains 1	9q33.3	26130
33387_at	gas7	growth arrest-specific 7	11q23 17p13.1	8522
34552_at	GAST	gastrin	17q21	2520
203_at	GATA2	GATA binding protein 2	3q21.3	2624
40511_at	GATA3	GATA binding protein 3	10p15	2625	Hypoparathyroidism, sensorineural deafness, and renal dysplasia,
40626_at, 40889_at, 32631_at, 32632_g_at	GBA	glucosidase, beta; acid (includes glucosylceramidase)	1q21	2629	Gaucher disease, perinatal lethal,Gaucher disease, type I,Gaucher disease, type II,Gaucher disease, type III,Gaucher disease, type IIIC,	hsa00511:Other glycan degradation,hsa00600:Sphingolipid metabolism,hsa04142:Lysosome,
41417_at	GDE1	glycerophosphodiester phosphodiesterase 1	16p12-p11.2	51573
1890_at	Gdf15	growth differentiation factor 15	19p13.11	9518
37279_at	gem	GTP binding protein overexpressed in skeletal muscle	8q13-q21	2669
39640_at	gfpt2	glutamine-fructose-6-phosphate transaminase 2	5q34-q35	9945		hsa00250:Alanine, aspartate and glutamate metabolism,hsa00520:Amino sugar and nucleotide sugar metabolism,
41696_at	Ggct	gamma-glutamyl cyclotransferase	7p15-p14	79017		hsa00480:Glutathione metabolism,
37263_at	GGH	gamma-glutamyl hydrolase (conjugase, folylpolygammaglutamyl hydrolase)	8q12.3	8836		hsa00790:Folate biosynthesis,
34311_at	GLRX	glutaredoxin (thioltransferase)	5q14	2745
33646_g_at, 35820_at, 33647_s_at	gm2a	GM2 ganglioside activator	5q31.3-q33.1	2760	GM2-gangliosidosis, AB variant,	hsa04142:Lysosome,
33809_at	Gnai1	guanine nucleotide binding protein (G protein), alpha inhibiting activity polypeptide 1	7q21	2770		hsa04062:Chemokine signaling pathway,hsa04360:Axon guidance,hsa04530:Tight junction,hsa04540:Gap junction,hsa04670:Leukocyte transendothelial migration,hsa04730:Long-term depression,hsa04914:Progesterone-mediated oocyte maturation,hsa04916:Melanogenesis,
36515_at	gne	glucosamine (UDP-N-acetyl)-2-epimerase/N-acetylmannosamine kinase	9p13.3	10020	Inclusion body myopathy, autosomal recessive,Nonaka myopathy,Sialuria,	hsa00520:Amino sugar and nucleotide sugar metabolism,
35436_at	GOLGA2	golgi autoantigen, golgin subfamily a, 2	9q34.11	2801
32150_at	golga4	golgi autoantigen, golgin subfamily a, 4	3p22-p21.3	2803
34412_s_at	GP1BB	glycoprotein Ib (platelet), beta polypeptide	22q11.21-q11.23 22q11.21-q11.23|22q11.21	2812	Bernard-Soulier syndrome, type B,Giant platelet disorder, isolated,	hsa04512:ECM-receptor interaction,hsa04640:Hematopoietic cell lineage,
1293_s_at, 934_at	Gpld1	glycosylphosphatidylinositol specific phospholipase D1	6p22.3-p22.2	2822	Population-based genome-wide association studies reveal six loci influencing plasma levels of liver enzymes,	hsa00563:Glycosylphosphatidylinositol(GPI)-anchor biosynthesis,
33682_at	GPR1	G protein-coupled receptor 1	2q33.3	2825
37308_at	GPR107	G protein-coupled receptor 107	9q34.11	57720
34951_at	GPR109A GPR109B	niacin receptor 2; niacin receptor 1	12q24.31	338442 8843
32083_at	GPR137B	G protein-coupled receptor 137B	1q42-q43	7107
35769_at	GPR56	G protein-coupled receptor 56	16q12.2-q21	9289	Polymicrogyria, bilateral frontoparietal,
770_at	gpX3	glutathione peroxidase 3 (plasma)	5q23	2878		hsa00480:Glutathione metabolism,hsa00590:Arachidonic acid metabolism,
1680_at	Grb7	growth factor receptor-bound protein 7	17q12	2886
40508_at	GSTA4	glutathione S-transferase alpha 4	6p12.1	2941		hsa00480:Glutathione metabolism,hsa00980:Metabolism of xenobiotics by cytochrome P450,hsa00982:Drug metabolism,
35671_at	GTF3C1	general transcription factor IIIC, polypeptide 1, alpha 220kDa	16p12	2975
36918_at	GUCY1A3	guanylate cyclase 1, soluble, alpha 3	4q31.3-q33 4q31.3-q33|4q31.1-q31.2	2982		hsa00230:Purine metabolism,hsa04270:Vascular smooth muscle contraction,hsa04540:Gap junction,hsa04730:Long-term depression,
39874_at	GUCY2F	guanylate cyclase 2F, retinal	Xq22	2986		hsa00230:Purine metabolism,
41419_at	GULP1	GULP, engulfment adaptor PTB domain containing 1	2q32.3-q33	51454
38714_at	Gypa	glycophorin A (MNS blood group)	4q28.2-q31.1	2993	Blood group, MN,Malaria, resistance to,	hsa04640:Hematopoietic cell lineage,
435_g_at, 33386_at, 434_at	H1f0	H1 histone family, member 0	22q13.1	3005
318_at, 319_g_at	H1fx	H1 histone family, member X	3q21.3	8971
40735_at	hal	histidine ammonia-lyase	12q22-q24.1	3034	Histidinemia,	hsa00340:Histidine metabolism,hsa00910:Nitrogen metabolism,
38037_at	HBEGF	heparin-binding EGF-like growth factor	5q23	1839	Diphtheria, susceptibility to,	hsa04012:ErbB signaling pathway,hsa04912:GnRH signaling pathway,hsa05120:Epithelial cell signaling in Helicobacter pylori infection,
39809_at	HBP1	HMG-box transcription factor 1	7q22-q31	26959
34520_at	Hcn2	hyperpolarization activated cyclic nucleotide-gated potassium channel 2	19p13.3	610
38810_at	HDAC5	histone deacetylase 5	17q21	10014
34703_f_at, 34704_r_at	Hhla1	HERV-H LTR-associating 1	8q24	10086
38973_at	Hic2	hypermethylated in cancer 2	22q11.21	23119
1039_s_at	HIF1A	hypoxia inducible factor 1, alpha subunit (basic helix-loop-helix transcription factor)	14q21-q24	3091		hsa04150:mTOR signaling pathway,hsa05200:Pathways in cancer,hsa05211:Renal cell carcinoma,
37564_at	hinfp	histone H4 transcription factor	11q23.3	25988
38340_at	Hip1r	huntingtin interacting protein 1 related	12q24	9026
39376_at	hipk1	homeodomain interacting protein kinase 1	1p13.2	204851
37018_at	Hist1h1c	histone cluster 1, H1c	6p21.3	3006
580_at	Hist1h1e	histone cluster 1, H1e	6p21.3	3008
35127_at	Hist1h2ab Hist1h2ae	histone cluster 1, H2ae; histone cluster 1, H2ab	6p21.3 6p22.2-p21.1	3012 8335		hsa05322:Systemic lupus erythematosus,
34308_at	Hist1h2ac	histone cluster 1, H2ac	6p21.3	8334		hsa05322:Systemic lupus erythematosus,
34964_at, 31693_f_at, 35598_at, 36757_at	Hist1h2ad HIST1H3A HIST1H3B HIST1H3C HIST1H3D HIST1H3E HIST1H3F hist1h3g HIST1H3H Hist1h3i HIST1H3J HIST2H3A hist2h3c HIST2H3D	histone cluster 1, H3j; histone cluster 1, H3i; histone cluster 1, H3h; histone cluster 1, H3g; histone cluster 1, H3f; histone cluster 1, H3e; histone cluster 1, H3d; histone cluster 1, H3c; histone cluster 1, H3b; histone cluster 1, H3a; histone cluster 1, H2ad; histone cluster 2, H3a; histone cluster 2, H3c; histone cluster 2, H3d	1q21.2 6p21.3 6p22-p21.3 6p22.1	126961 3013 333932 653604 8350 8351 8352 8353 8354 8355 8356 8357 8358 8968		hsa05322:Systemic lupus erythematosus,
34157_f_at, 31749_f_at, 31992_f_at	Hist1h2ag Hist1h2ah Hist1h2ai Hist1h2ak HIST1H2AL HIST1H2AM	histone cluster 1, H2ag; histone cluster 1, H2ah; histone cluster 1, H2ai; histone cluster 1, H2ak; histone cluster 1, H2al; histone cluster 1, H2am	6p21.33 6p22-p21.3 6p22.1	8329 8330 8332 8336 85235 8969		hsa05322:Systemic lupus erythematosus,
32980_f_at, 31524_f_at, 31522_f_at, 31523_f_at	Hist1h2bc HIST1H2BE HIST1H2BF HIST1H2BG HIST1H2BI	histone cluster 1, H2bi; histone cluster 1, H2bg; histone cluster 1, H2be; histone cluster 1, H2bf; histone cluster 1, H2bc	6p21.3	8339 8343 8344 8346 8347		hsa05322:Systemic lupus erythematosus,
38576_at	HIST1H2BD	histone cluster 1, H2bd	6p21.3	3017		hsa05322:Systemic lupus erythematosus,
35562_at, 153_f_at	HIST1H2BJ	histone cluster 1, H2bj	6p22.1	8970	Variants in TF and HFE explain approximately 40% of genetic variation in serum-transferrin levels,	hsa05322:Systemic lupus erythematosus,
32819_at	HIST1H2BK	histone cluster 1, H2bk	6p21.33	85236		hsa05322:Systemic lupus erythematosus,
35576_f_at	Hist1h2bl	histone cluster 1, H2bl	6p22-p21.3	8340		hsa05322:Systemic lupus erythematosus,
31528_f_at	HIST1H2BM	histone cluster 1, H2bm	6p21.3 6p22-p21.3	8342		hsa05322:Systemic lupus erythematosus,
36347_f_at	HIST1H2BN	histone cluster 1, H2bn	6p22-p21.3	8341		hsa05322:Systemic lupus erythematosus,
762_f_at, 31521_f_at, 34027_f_at	Hist1h4a Hist1h4b Hist1h4c Hist1h4d HIST1H4E Hist1h4f Hist1h4h Hist1h4i Hist1h4j Hist1h4k hist1h4l HIST2H4A HIST2H4B Hist4h4	histone cluster 1, H4l; histone cluster 1, H4k; histone cluster 4, H4; histone cluster 1, H4h; histone cluster 1, H4j; histone cluster 1, H4i; histone cluster 1, H4d; histone cluster 1, H4c; histone cluster 1, H4f; histone cluster 1, H4e; histone cluster 1, H4b; histone cluster 1, H4a; histone cluster 2, H4a; histone cluster 2, H4b	12p12.3 1q21 6p21.3 6p21.33 6p22-p21.3	121504 554313 8294 8359 8360 8361 8362 8363 8364 8365 8366 8367 8368 8370		hsa05322:Systemic lupus erythematosus,
286_at	HIST2H2AA3 HIST2H2AA4	histone cluster 2, H2aa3; histone cluster 2, H2aa4	1q21.2	723790 8337		hsa05322:Systemic lupus erythematosus,
33352_at	HIST2H2BE	histone cluster 2, H2be	1q21-q23	8349		hsa05322:Systemic lupus erythematosus,
36175_s_at	hivep2	human immunodeficiency virus type I enhancer binding protein 2	6q23-q24	3097
40964_at	Hk2 HK2P1	hexokinase 2 pseudogene; hexokinase 2	2p13 Xq21.1	3099 642546		hsa00010:Glycolysis / Gluconeogenesis,hsa00051:Fructose and mannose metabolism,hsa00052:Galactose metabolism,hsa00500:Starch and sucrose metabolism,hsa00520:Amino sugar and nucleotide sugar metabolism,hsa04910:Insulin signaling pathway,hsa04930:Type II diabetes mellitus,
39328_at	HMGCR	3-hydroxy-3-methylglutaryl-Coenzyme A reductase	5q13.3-q14	3156	Common SNPs in HMGCR in Micronesians and Whites Associated With LDL-Cholesterol Levels Affect Alternative Splicing of Exon13,Common variants at 30 loci contribute to polygenic dyslipidemia,Loci influencing lipid levels and coronary heart disease risk in 16 European population cohorts,Low density lipoprotein cholesterol level QTL 3,Six new loci associated with blood low-density lipoprotein cholest…	hsa00900:Terpenoid backbone biosynthesis,
33802_at	hmox1	heme oxygenase (decycling) 1	22q12 22q12|22q13.1	3162	Heme oxygenase-1 deficiency,Pulmonary disease, chronic obstructive, susceptibility to,	hsa00860:Porphyrin and chlorophyll metabolism,
37916_at	Hmox2	heme oxygenase (decycling) 2	16p13.3	3163		hsa00860:Porphyrin and chlorophyll metabolism,
39698_at	hopx	HOP homeobox	4q11-q12	84525
37323_r_at, 32570_at, 37322_s_at	HPGD	hydroxyprostaglandin dehydrogenase 15-(NAD)	4q34-q35	3248	Cranioosteoarthropathy,Digital clubbing, isolated congenital,Hypertrophic osteoarthropathy, primary, autosomal recessive,
38406_f_at	HPGDS ptgds	prostaglandin D2 synthase, hematopoietic; prostaglandin D2 synthase 21kDa (brain)	4q22.3 9q34.2-q34.3	27306 5730		hsa00590:Arachidonic acid metabolism,
117_at, 35965_at	HSPA6 HSPA7	heat shock 70kDa protein 7 (HSP70B); heat shock 70kDa protein 6 (HSP70B')	1q23 1q23.3 6p21.3	3310 3311		hsa03040:Spliceosome,hsa04010:MAPK signaling pathway,hsa04144:Endocytosis,hsa04612:Antigen processing and presentation,
36785_at	Hspb1 HSPBL2	heat shock 27kDa protein-like 2 pseudogene; heat shock 27kDa protein 1	7q11.23 9q21.13	3315 653553	Charcot-Marie-Tooth disease, axonal, type 2F,Neuropathy, distal hereditary motor, type IIB,	hsa04010:MAPK signaling pathway,hsa04370:VEGF signaling pathway,
34373_at	HUWE1	HECT, UBA and WWE domain containing 1	Xp11.22	10075	Mental retardation, X-linked syndromic 10,Mental retardation, X-linked syndromic, Turner type,	hsa04120:Ubiquitin mediated proteolysis,
37176_at, 1546_at	Hyal1	hyaluronoglucosaminidase 1	3p21.3-p21.2	3373	Mucopolysaccharidosis type IX,	hsa00531:Glycosaminoglycan degradation,hsa04142:Lysosome,
36617_at, 36619_r_at, 36618_g_at	id1	inhibitor of DNA binding 1, dominant negative helix-loop-helix protein	20q11	3397		hsa04350:TGF-beta signaling pathway,
41215_s_at	ID2	inhibitor of DNA binding 2, dominant negative helix-loop-helix protein	2p25	3398		hsa04350:TGF-beta signaling pathway,
31840_at	IDE	insulin-degrading enzyme	10q23-q25	3416		hsa05010:Alzheimer's disease,
40815_g_at, 40814_at	ids	iduronate 2-sulfatase	Xq28	3423	Hunter syndrome,Mucopolysaccharidosis II,	hsa00531:Glycosaminoglycan degradation,hsa04142:Lysosome,
36097_at	ier2	immediate early response 2	19p13.13	9592
32901_s_at, 37679_at	ifrd1	interferon-related developmental regulator 1	7q22-q31	3475
2079_s_at, 36782_s_at, 1664_at, 1591_s_at	IGF2 INS INS-IGF2	insulin-like growth factor 2 (somatomedin A); insulin; INS-IGF2 readthrough transcript	11p15.5	3481 3630 723961	A genome-wide association study identifies KIAA0350 as a type 1 diabetes gene,Diabetes mellitus, rare form,Hyperproinsulinemia, familial,Hyperproinsulinemia, familial, with or without diabetes,insulin-related DNA polymorphism,Intrauterine and postnatal growth retardation,MODY, one form,Robust associations of four new chromosome regions from genome-wide analyses of type 1 diabetes,	hsa04114:Oocyte meiosis,hsa04140:Regulation of autophagy,hsa04150:mTOR signaling pathway,hsa04810:Regulation of actin cytoskeleton,hsa04910:Insulin signaling pathway,hsa04914:Progesterone-mediated oocyte maturation,hsa04930:Type II diabetes mellitus,hsa04940:Type I diabetes mellitus,hsa04950:Maturity onset diabetes of the young,hsa04960:Aldosterone-regulated sodium reabsorption,hsa05215:Prostate …
1601_s_at	IGFBP5	insulin-like growth factor binding protein 5	2q33-q36	3488
1368_at	Il1r1	interleukin 1 receptor, type I	2q12	3554		hsa04010:MAPK signaling pathway,hsa04060:Cytokine-cytokine receptor interaction,hsa04210:Apoptosis,hsa04640:Hematopoietic cell lineage,
998_s_at	IL1R2	interleukin 1 receptor, type II	2q12-q22	7850		hsa04010:MAPK signaling pathway,hsa04060:Cytokine-cytokine receptor interaction,hsa04640:Hematopoietic cell lineage,
31560_at	Il1rl2	interleukin 1 receptor-like 2	2q12	8808
37603_at, 31343_at	IL1RN	interleukin 1 receptor antagonist	2q14.2	3557	A Genome-Wide Association Study Identifies Protein Quantitative Trait Loci (pQTLs),Gastric cancer risk after H. pylori infection,
160032_at	il6r	interleukin 6 receptor	1q21	3570	A Genome-Wide Association Study Identifies Protein Quantitative Trait Loci (pQTLs),Framingham Heart Study genome-wide association: results for pulmonary function measures,Loci Related to Metabolic-Syndrome Pathways Including LEPR, HNF1A, IL6R, and GCKR Associate with Plasma C-Reactive Protein: The Women's Genome Health Study,	hsa04060:Cytokine-cytokine receptor interaction,hsa04630:Jak-STAT signaling pathway,hsa04640:Hematopoietic cell lineage,
36496_at	Impa2	inositol(myo)-1(or 4)-monophosphatase 2	18p11.2	3613	A genome-wide genotyping study in patients with ischaemic stroke: initial analysis and data release,	hsa00562:Inositol phosphate metabolism,hsa04070:Phosphatidylinositol signaling system,
33290_at	INPP5B	inositol polyphosphate-5-phosphatase, 75kDa	1p34	3633		hsa00562:Inositol phosphate metabolism,hsa04070:Phosphatidylinositol signaling system,
41348_at	Irx5	iroquois homeobox 5	16q11.2-q13	10265
38533_s_at	ITGAM	integrin, alpha M (complement component 3 receptor 3 subunit)	16p11.2	3684	Association of systemic lupus erythematosus with C8orf13-BLK and ITGAM-ITGAX,Genetic variants near TNFAIP3 on 6q23 are associated with systemic lupus erythematosus,Genome-wide association scan in women with systemic lupus erythematosus identifies susceptibility variants in ITGAM, PXK, KIAA1542 and other loci,Systemic lupus erythematous, association with susceptibility to, 6,	hsa04514:Cell adhesion molecules (CAMs),hsa04640:Hematopoietic cell lineage,hsa04670:Leukocyte transendothelial migration,hsa04810:Regulation of actin cytoskeleton,
2019_s_at	ITGB7	integrin, beta 7	12q13.13	3695		hsa04510:Focal adhesion,hsa04512:ECM-receptor interaction,hsa04514:Cell adhesion molecules (CAMs),hsa04672:Intestinal immune network for IgA production,hsa04810:Regulation of actin cytoskeleton,hsa05410:Hypertrophic cardiomyopathy (HCM),hsa05412:Arrhythmogenic right ventricular cardiomyopathy (ARVC),hsa05414:Dilated cardiomyopathy,
41300_s_at	itm2b	integral membrane protein 2B	13q14.3	9445	Dementia, familial British,Dementia, familial Danish,
360_at, 34209_at	ITPKC	inositol 1,4,5-trisphosphate 3-kinase C	19q13.1	80271	Kawasaki disease, susceptibility to,
174_s_at	Itsn2	intersectin 2	2pter-p25.1	50618
36355_at	IVL	involucrin	1q21	3713
34782_at	jarid2	jumonji, AT rich interactive domain 2	6p24-p23	3720	Genome-wide association analysis of susceptibility and clinical phenotype in multiple sclerosis,
38216_at	JMJD1C	jumonji domain containing 1C	10q21.2-q21.3	221037	Population-based genome-wide association studies reveal six loci influencing plasma levels of liver enzymes,
32583_at	Jun	jun oncogene	1p32-p31	3725		hsa04010:MAPK signaling pathway,hsa04012:ErbB signaling pathway,hsa04310:Wnt signaling pathway,hsa04510:Focal adhesion,hsa04620:Toll-like receptor signaling pathway,hsa04660:T cell receptor signaling pathway,hsa04662:B cell receptor signaling pathway,hsa04722:Neurotrophin signaling pathway,hsa04912:GnRH signaling pathway,hsa05120:Epithelial cell signaling in Helicobacter pylori infection,hsa05200…
32786_at, 2049_s_at	junb	jun B proto-oncogene	19p13.2	3726
1612_s_at, 41483_s_at	JUND	jun D proto-oncogene	19p13.2	3727		hsa04010:MAPK signaling pathway,
2047_s_at	JUP	junction plakoglobin	17q21	3728	Arrhythmogenic right ventricular dysplasia, familial, 12,Naxos disease,	hsa05200:Pathways in cancer,hsa05221:Acute myeloid leukemia,hsa05412:Arrhythmogenic right ventricular cardiomyopathy (ARVC),
37225_at	KANK1 LOC647886	KN motif and ankyrin repeat domains 1; similar to ankyrin repeat domain protein 15 isoform b	9 9p24.3	23189 647886
1012_at	KAT2B	K(lysine) acetyltransferase 2B	3p24	8850		hsa04330:Notch signaling pathway,
32496_at	KCNE1	potassium voltage-gated channel, Isk-related family, member 1	21q22.1-q22.2 21q22.1-q22.2|21q22.12	3753	Jervell and Lange-Nielsen syndrome,Jervell and Lange-Nielsen syndrome 2,Long QT syndrome 2/5,Long QT syndrome-5,
37552_at	KCNK1	potassium channel, subfamily K, member 1	1q42-q43	3775
33360_at	KDM2A	lysine (K)-specific demethylase 2A	11q13.1	22992
34786_at	KDM3A	lysine (K)-specific demethylase 3A	2p11.2	55818
33268_at	KDM5C	lysine (K)-specific demethylase 5C	Xp11.22-p11.21	8242	Mental retardation, X-linked, syndromic, JARID1C-related,
41387_r_at	KDM6B	lysine (K)-specific demethylase 6B	17p13.1	23135
36970_at	KIAA0182	KIAA0182	16q24.1	23199
37748_at	KIAA0232	KIAA0232	4p16.1	9778
32208_at	KIAA0355	KIAA0355	19q13.11	9710
41830_at	KIAA0494	KIAA0494	1pter-p22.1	9813
38735_at	KIAA0513	KIAA0513	16q24.1	9764
41372_at	KIAA0831	KIAA0831	14q22.3	22863
36054_at	KIAA0892	KIAA0892	19p13.11	23383
33885_at	kiaa0907	KIAA0907	1q22	22889
36002_at	KIAA1012	KIAA1012	18q12.1	22878
36070_at	KIAA1199	KIAA1199	15q24	57214
1654_at	KIAA1549	KIAA1549	7q34	57670
32079_at	Kif13b	kinesin family member 13B	8p21.1	23303
34293_at, 34294_at	Kifc3	kinesin family member C3	16q13-q21	3801
224_at, 38374_at	KLF10	Kruppel-like factor 10	8q22.2	7071
36214_at	Klf4	Kruppel-like factor 4 (gut)	9q31	9314
37926_at	Klf5	Kruppel-like factor 5 (intestinal)	13q22.1	688
37026_at	klf6	Kruppel-like factor 6	10p15	1316	Gastric cancer, somatic,Prostate adenocarcinoma-1,Prostate cancer, somatic,
34285_at	KLHL18	kelch-like 18 (Drosophila)	3p21.31	23276
37230_at	klhl21	kelch-like 21 (Drosophila)	1p36.31	9903
36838_at	Klk10	kallikrein-related peptidase 10	19q13.3-q13.4	5655
40035_at	Klk11	kallikrein-related peptidase 11	19q13.3-q13.4	11012
36407_at, 36406_at	KLK13	kallikrein-related peptidase 13	19q13.3-q13.4	26085
37554_at	KLK6	kallikrein-related peptidase 6	19q13.3	5653
38143_at	KLK7	kallikrein-related peptidase 7	19q13.33	5650
37131_at	KLK8	kallikrein-related peptidase 8	19q13.3-q13.4	11202
558_at	KRT1	keratin 1	12q12-q13	3848	Cyclic ichthyosis with epidermolytic hyperkeratosis,Epidermolytic hyperkeratosis,Ichthyosis histrix, Curth-Macklin type,Keratosis palmoplantaria striata,Keratosis palmoplantaris striata III,Unna-Thost disease, nonepidermolytic,
38610_s_at	KRT10	keratin 10	17q21	3858	Epidermolytic hyperkeratosis,Ichthyosis, cyclic, with epidermolytic hyperkeratosis,Keratosis palmaris et plantaris,Nevus, epidermal, epidermolytic hyperkeratotic type,
36883_at	KRT13	keratin 13	17q12-q21.2	3860	White sponge nevus,
37473_at, 601_s_at	Krt16 KRT16P2	keratin 16; keratin type 16-like	17p11.2 17q12-q21	3868 400578	Pachyonychia congenita, Jadassohn-Lewandowsky type,Palmoplantar keratoderma, nonepidermolytic,Palmoplantar verrucous nevus, unilateral,
34301_r_at	KRT17 KRT17P3	keratin 17; keratin 17 pseudogene 3	17q11.2 17q12-q21	3872 729682	Pachyonychia congenita, Jackson-Lawler type,Steatocystoma multiplex,
34621_at	KRT2	keratin 2	12q11-q13	3849	Ichthyosis bullosa of Siemens,
36310_at	Krt31	keratin 31	17q12-q21	3881
34568_at	KRT33B	keratin 33B	17q12-q21	3884
31422_at	KRT37	keratin 37	17q12-q21	8688
39657_at	Krt4	keratin 4	12q12-q13	3851	White sponge nevus,
34556_at	KRT9	keratin 9	17q21.1-q21.2	3857	Epidermolytic palmoplantar keratoderma,
31688_at	LCE2B	late cornified envelope 2B	1q21	26239
32821_at	Lcn2	lipocalin 2	9q34	3934
38985_at	LEPROTL1	leptin receptor overlapping transcript-like 1	8p21.2-p21.1	23484
38608_at	LGALS7 LGALS7B	lectin, galactoside-binding, soluble, 7; lectin, galactoside-binding, soluble, 7B	19q13.2	3963 653499
1846_at	LGALS8	lectin, galactoside-binding, soluble, 8	1q42-q43	3964
33325_at	LOC100127984 RPS6KA2	ribosomal protein S6 kinase, 90kDa, polypeptide 2; hypothetical LOC100127984	6q27	100127984 6196		hsa04010:MAPK signaling pathway,hsa04114:Oocyte meiosis,hsa04150:mTOR signaling pathway,hsa04720:Long-term potentiation,hsa04722:Neurotrophin signaling pathway,hsa04914:Progesterone-mediated oocyte maturation,
39134_at	LOC100128526 TOM1	hypothetical LOC100128526; target of myb1 (chicken)	22q12.3 22q13.1	100128526 10043
1000_at	LOC100271831 MAPK3	hypothetical LOC100271831; mitogen-activated protein kinase 3	16p11.2	100271831 5595		hsa04010:MAPK signaling pathway,hsa04012:ErbB signaling pathway,hsa04062:Chemokine signaling pathway,hsa04114:Oocyte meiosis,hsa04150:mTOR signaling pathway,hsa04270:Vascular smooth muscle contraction,hsa04320:Dorso-ventral axis formation,hsa04350:TGF-beta signaling pathway,hsa04360:Axon guidance,hsa04370:VEGF signaling pathway,hsa04510:Focal adhesion,hsa04520:Adherens junction,hsa04540:Gap junct…
40061_at	LOC152845 PLAGL2	pleiomorphic adenoma gene-like 2; similar to pleiomorphic adenoma gene-like 2	20q11.21 4q21.23	152845 5326
39431_at	LOC440434 npepps	hypothetical protein FLJ11822; aminopeptidase puromycin sensitive	17q12 17q21	440434 9520
39841_at	LOC440459 SLC16A6	solute carrier family 16, member 6 (monocarboxylic acid transporter 7); similar to solute carrier family 16, member 6	17q24.1 17q24.2	440459 9120
38524_at	LOC647859 Ocln	occludin pseudogene; occludin	5q13.1 5q13.2	4950 647859		hsa04514:Cell adhesion molecules (CAMs),hsa04530:Tight junction,hsa04670:Leukocyte transendothelial migration,hsa05130:Pathogenic Escherichia coli infection,
32380_at, 31502_at	LOC652798 PKP1	plakophilin 1 (ectodermal dysplasia/skin fragility syndrome); similar to plakophilin 1 isoform 1a	1q32	5317 652798	Ectodermal dysplasia/skin fragility syndrome,
38730_at	LOC729143 Mprip	myosin phosphatase Rho interacting protein; similar to Myosin phosphatase Rho-interacting protein (Rho-interacting protein 3) (M-RIP) (RIP3) (p116Rip)	17p11.2 3p21.32	23164 729143
36207_at	LOC729799 sec14l1	SEC14-like 1 (S. cerevisiae); SEC14-like 1 pseudogene	11p11.2 17q25.1-q25.2	6397 729799
41105_s_at	LOC730031 mllt4	similar to Afadin (Protein AF-6); myeloid/lymphoid or mixed-lineage leukemia (trithorax homolog, Drosophila); translocated to, 4	6 6q27	4301 730031		hsa04520:Adherens junction,hsa04530:Tight junction,hsa04670:Leukocyte transendothelial migration,
41542_at	LOC732229 ZFAND5	similar to zinc finger, AN1-type domain 5; zinc finger, AN1-type domain 5	19q13.2 9q13-q21	732229 7763
38851_at	LOR	loricrin	1q21	4014	Erythrokeratoderma, progressive symmetric,Vohwinkel syndrome with ichthyosis,
41418_at	LPHN1	latrophilin 1	19p13.2	22859
34174_s_at, 33872_at	LPHN2	latrophilin 2	1p31.1	23266
40447_at	LPIN2	lipin 2	18p11.31	9663	Majeed syndrome,
34409_at	LRP10	low density lipoprotein receptor-related protein 10	14q11.2	26020
36284_at	LY6D	lymphocyte antigen 6 complex, locus D	8q24-qter	8581
36222_at	LY6G6C	lymphocyte antigen 6 complex, locus G6C	6p21.33	80740
35869_at	LY86	lymphocyte antigen 86	6p25.1	9450
41641_at	LYPD3	LY6/PLAUR domain containing 3	19q13.31	27076
1720_at	Mad2l1	MAD2 mitotic arrest deficient-like 1 (yeast)	4q27	4085		hsa04110:Cell cycle,hsa04114:Oocyte meiosis,hsa04914:Progesterone-mediated oocyte maturation,
41504_s_at, 41505_r_at	maf	v-maf musculoaponeurotic fibrosarcoma oncogene homolog (avian)	16q22-q23	4094	Cataract, congenital, cerulean type, 4,Cataract, pulverulent, juvenile-onset,
36711_at	Maff	v-maf musculoaponeurotic fibrosarcoma oncogene homolog F (avian)	22q13.1	23764
39370_at	MAP1LC3B	microtubule-associated protein 1 light chain 3 beta	16q24.2	81631
35422_at, 219_i_at, 183_at, 1972_s_at	map2	microtubule-associated protein 2	2q34-q35	4133
2075_s_at, 1622_at	Map2k3	mitogen-activated protein kinase kinase 3	17q11.2	5606		hsa04010:MAPK signaling pathway,hsa04620:Toll-like receptor signaling pathway,hsa04664:Fc epsilon RI signaling pathway,hsa04912:GnRH signaling pathway,hsa05014:Amyotrophic lateral sclerosis (ALS),
35651_at, 35652_g_at	MAP3K4	mitogen-activated protein kinase kinase kinase 4	6q26	4216		hsa04010:MAPK signaling pathway,hsa04912:GnRH signaling pathway,
1891_at, 34770_at	MAP3K8	mitogen-activated protein kinase kinase kinase 8	10p11.23	1326	Lung cancer, somatic,	hsa04010:MAPK signaling pathway,hsa04620:Toll-like receptor signaling pathway,hsa04660:T cell receptor signaling pathway,
40574_at	MAP3K9	mitogen-activated protein kinase kinase kinase 9	14q24.3-q31	4293
33245_at	MAPK13	mitogen-activated protein kinase 13	6p21.31	5603		hsa04010:MAPK signaling pathway,hsa04370:VEGF signaling pathway,hsa04620:Toll-like receptor signaling pathway,hsa04621:NOD-like receptor signaling pathway,hsa04622:RIG-I-like receptor signaling pathway,hsa04660:T cell receptor signaling pathway,hsa04664:Fc epsilon RI signaling pathway,hsa04670:Leukocyte transendothelial migration,hsa04722:Neurotrophin signaling pathway,hsa04912:GnRH signaling pat…
37733_at, 1999_s_at, 1671_s_at	Mapk14	mitogen-activated protein kinase 14	6p21.3-p21.2	1432		hsa04010:MAPK signaling pathway,hsa04370:VEGF signaling pathway,hsa04620:Toll-like receptor signaling pathway,hsa04621:NOD-like receptor signaling pathway,hsa04622:RIG-I-like receptor signaling pathway,hsa04660:T cell receptor signaling pathway,hsa04664:Fc epsilon RI signaling pathway,hsa04670:Leukocyte transendothelial migration,hsa04722:Neurotrophin signaling pathway,hsa04912:GnRH signaling pat…
36926_at	MAPK6	mitogen-activated protein kinase 6	15q21	5597
35617_at	Mapk7	mitogen-activated protein kinase 7	17p11.2	5598		hsa04010:MAPK signaling pathway,hsa04540:Gap junction,hsa04722:Neurotrophin signaling pathway,hsa04912:GnRH signaling pathway,
1637_at, 1991_s_at, 39237_at	mapkapk3	mitogen-activated protein kinase-activated protein kinase 3	3p21.3	7867		hsa04010:MAPK signaling pathway,hsa04370:VEGF signaling pathway,
37786_at	Mar3	membrane-associated ring finger (C3HC4) 3	5q23.2	115123
35268_at	Mar7	membrane-associated ring finger (C3HC4) 7	2q24.2	64844
41828_at	mbd1	methyl-CpG binding domain protein 1	18q21	4152
31824_at, 837_s_at	ME1	malic enzyme 1, NADP(+)-dependent, cytosolic	6q12	4199		hsa00620:Pyruvate metabolism,hsa03320:PPAR signaling pathway,
41625_at	MED13	mediator complex subunit 13	17q22-q23	9969
32130_at	MED25	mediator complex subunit 25	19q13.3	81857
33241_at	MFAP3L	microfibrillar-associated protein 3-like	4q32.3	9848
40934_at, 40935_at	mfsd5	major facilitator superfamily domain containing 5	12q13.13	84975
40772_at	Mfsd7	major facilitator superfamily domain containing 7	4p16.3	84179
35792_at	MGLL	monoglyceride lipase	3q21.3	11343		hsa00561:Glycerolipid metabolism,
36683_at	MGP	matrix Gla protein	12p13.1-p12.3	4256	Keutel syndrome,Natural teeth remaining intact,
32235_at	mgrn1	mahogunin, ring finger 1	16p13.3	23295		hsa04120:Ubiquitin mediated proteolysis,
39833_at	MINK1	misshapen-like kinase 1 (zebrafish)	17p13.2	50488
38228_g_at	MITF	microphthalmia-associated transcription factor	3p14.2-p14.1	4286	Tietz syndrome,Waardenburg syndrome, type IIA,Waardenburg syndrome/ocular albinism, digenic,	hsa04916:Melanogenesis,hsa05200:Pathways in cancer,hsa05218:Melanoma,
1280_i_at	MKNK2	MAP kinase interacting serine/threonine kinase 2	19p13.3	2872		hsa04010:MAPK signaling pathway,hsa04910:Insulin signaling pathway,
37283_at	mn1	meningioma (disrupted in balanced translocation) 1	22q11 22q11|22q12.1	4330	Meningioma,
34767_at	Moap1	modulator of apoptosis 1	14q32	64112
34986_at	MPZL2	myelin protein zero-like 2	11q24	10205
926_at	MT1G	metallothionein 1G	16q13	4495
38945_at	MTF1	metal-regulatory transcription factor 1	1p33	4520
35739_at	mtmr3	myotubularin related protein 3	22q12.2	8897
927_s_at, 700_s_at	MUC1	mucin 1, cell surface associated	1q21	4582
1774_at, 34543_at	MXD1	MAX dimerization protein 1	2p13-p12	4084
654_at, 39072_at, 748_s_at	MXI1	MAX interactor 1	10q24-q25	4601	Genome-wide association analysis of susceptibility and clinical phenotype in multiple sclerosis,Neurofibrosarcoma,Prostate cancer, susceptibility to,
33375_at	myo6	myosin VI	6q13	4646	Deafness, autosomal dominant 22,Deafness, autosomal recessive 37,Deafness, sensorineural, with hypertrophic cardiomyopathy,
35203_at	MYST4	MYST histone acetyltransferase (monocytic leukemia) 4	10q22.2	23522
40569_at	mzf1	myeloid zinc finger 1	19q13.4	7593
32069_at	N4BP1	NEDD4 binding protein 1	16q12.1	9683
34459_at	N4BP2L2	NEDD4 binding protein 2-like 2	13q13.1	10443
33849_at	NAMPT	nicotinamide phosphoribosyltransferase	7q22.2	10135		hsa00760:Nicotinate and nicotinamide metabolism,
36977_at	napA	N-ethylmaleimide-sensitive factor attachment protein, alpha	19q13.32	8775
35763_at	NBEAL2	neurobeachin-like 2	3p21.31	23218
36118_at, 484_at	NCOA1	nuclear receptor coactivator 1	2p23	8648
34313_at, 34312_at	Ncoa2	nuclear receptor coactivator 2	8q13.3	10499
34413_at	NDEL1	nudE nuclear distribution gene E homolog (A. nidulans)-like 1	17p13.1	81565
40500_at	ndrg4	NDRG family member 4	16q21-q22.1	65009
38207_at	Neat1	non-protein coding RNA 84	11q13.1	283131
38461_at	NEB	nebulin	2q22	4703	Nemaline myopathy 2, autosomal recessive,
36424_at, 34873_at	Nebl	nebulette	10p12	10529
32512_at	nefm	neurofilament, medium polypeptide	8p21	4741		hsa05014:Amyotrophic lateral sclerosis (ALS),
34752_at	NEK7	NIMA (never in mitosis gene a)-related kinase 7	1q31.3	140609
250_at, 40822_at	Nfatc3	nuclear factor of activated T-cells, cytoplasmic, calcineurin-dependent 3	16q22.2	4775		hsa04310:Wnt signaling pathway,hsa04360:Axon guidance,hsa04370:VEGF signaling pathway,hsa04650:Natural killer cell mediated cytotoxicity,hsa04660:T cell receptor signaling pathway,hsa04662:B cell receptor signaling pathway,
37544_at	NFIL3	nuclear factor, interleukin 3 regulated	9q22	4783
1461_at	NFKBIA	nuclear factor of kappa light polypeptide gene enhancer in B-cells inhibitor, alpha	14q13	4792	Ectodermal dysplasia, anhidrotic, with T-cell immunodeficiency,	hsa04062:Chemokine signaling pathway,hsa04210:Apoptosis,hsa04620:Toll-like receptor signaling pathway,hsa04621:NOD-like receptor signaling pathway,hsa04622:RIG-I-like receptor signaling pathway,hsa04623:Cytosolic DNA-sensing pathway,hsa04660:T cell receptor signaling pathway,hsa04662:B cell receptor signaling pathway,hsa04722:Neurotrophin signaling pathway,hsa04920:Adipocytokine signaling pathway…
41656_at	NMT2	N-myristoyltransferase 2	10p13	9397
38750_at	NOTCH3	Notch homolog 3 (Drosophila)	19p13.2-p13.1	4854	Cerebral arteriopathy with subcortical infarcts and leukoencephalopathy,	hsa04320:Dorso-ventral axis formation,hsa04330:Notch signaling pathway,
37047_at, 980_at	npc1	Niemann-Pick disease, type C1	18q11-q12	4864	Niemann-Pick disease, type C1,Niemann-Pick disease, type D,	hsa04142:Lysosome,
35705_at	NR1D2	nuclear receptor subfamily 1, group D, member 2	3p24.2	9975
36714_at	NR2C2	nuclear receptor subfamily 2, group C, member 2	3p25	7182
40088_at	NRIP1	nuclear receptor interacting protein 1	21q11.2	8204
38719_at	Nsf	N-ethylmaleimide-sensitive factor	17q21	4905
31794_at, 738_at	NT5C2	5'-nucleotidase, cytosolic II	10q24.32-q24.33	22978		hsa00230:Purine metabolism,hsa00240:Pyrimidine metabolism,hsa00760:Nicotinate and nicotinamide metabolism,
1059_at	NTRK3	neurotrophic tyrosine kinase, receptor, type 3	15q25	4916		hsa04722:Neurotrophin signaling pathway,
35643_at	nucb2	nucleobindin 2	11p15.1-p14	4925
40564_at	NUP50	nucleoporin 50kDa	22q13.31	10762
40018_at	nupl1	nucleoporin like 1	13q12.13	9818
269_at, 34491_at	OASL	2'-5'-oligoadenylate synthetase-like	12q24.2	8638
40470_at	Ogdh	oxoglutarate (alpha-ketoglutarate) dehydrogenase (lipoamide)	7p14-p13	4967	Alpha-ketoglutarate dehydrogenase deficiency,	hsa00020:Citrate cycle (TCA cycle),hsa00310:Lysine degradation,hsa00380:Tryptophan metabolism,
36689_at	OSBPL1A	oxysterol binding protein-like 1A	18q11.1	114876	A Genome-Wide Association Study Identifies Protein Quantitative Trait Loci (pQTLs),
40102_at	OSBPL2	oxysterol binding protein-like 2	20q13.3	9885
34047_at	OVOL1	ovo-like 1(Drosophila)	11q13	5017
39136_at	OXSR1	oxidative-stress responsive 1	3p22-p21.3	9943
31866_at	paf1	Paf1, RNA polymerase II associated factor, homolog (S. cerevisiae)	19q13.1	54623
33814_at	PAK4	p21 protein (Cdc42/Rac)-activated kinase 4	19q13.2	10298		hsa04012:ErbB signaling pathway,hsa04360:Axon guidance,hsa04510:Focal adhesion,hsa04660:T cell receptor signaling pathway,hsa04810:Regulation of actin cytoskeleton,hsa05211:Renal cell carcinoma,
34305_at	Pcbp1	poly(rC) binding protein 1	2p13-p12	5093		hsa03040:Spliceosome,
37562_at	PCDH1	protocadherin 1	5q32-q33	5097
37964_at	Pcgf3	polycomb group ring finger 3	4p16.3	10336
32187_at	pcmtd2	protein-L-isoaspartate (D-aspartate) O-methyltransferase domain containing 2	20q13.33	55251
32001_s_at	Pcsk6	proprotein convertase subtilisin/kexin type 6	15q26.3	5046
40834_at	Pdzd2	PDZ domain containing 2	5p13.3	23037
31610_at	PDZK1IP1	PDZK1 interacting protein 1	1p33	10158
36829_at	Per1	period homolog 1 (Drosophila)	17p13.1-p12	5187		hsa04710:Circadian rhythm,
35008_at	PER2	period homolog 2 (Drosophila)	2q37.3	8864	Advanced sleep phase syndrome, familial,	hsa04710:Circadian rhythm,
37464_at	Pex13	peroxisomal biogenesis factor 13	2p14-p16	5194	Adrenoleukodystrophy, neonatal,Zellweger syndrome,
37111_g_at, 39522_at	pfkfb3	6-phosphofructo-2-kinase/fructose-2,6-biphosphatase 3	10p14-p15	5209		hsa00051:Fructose and mannose metabolism,
32839_at	PHACTR4	phosphatase and actin regulator 4	1p35.3	65979
35719_at	PHLPP1	PH domain and leucine rich repeat protein phosphatase 1	18q21.33	23239
41469_at	PI3	peptidase inhibitor 3, skin-derived	20q12-q13	5266
40783_s_at	PI4KA	phosphatidylinositol 4-kinase, catalytic, alpha	22q11.21	5297		hsa00562:Inositol phosphate metabolism,hsa04070:Phosphatidylinositol signaling system,
36573_at	PIAS1	protein inhibitor of activated STAT, 1	15q	8554		hsa04120:Ubiquitin mediated proteolysis,hsa04630:Jak-STAT signaling pathway,hsa05200:Pathways in cancer,hsa05222:Small cell lung cancer,
41715_at	PIK3C2B	phosphoinositide-3-kinase, class 2, beta polypeptide	1q32	5287		hsa00562:Inositol phosphate metabolism,hsa04070:Phosphatidylinositol signaling system,
883_s_at, 1779_s_at	Pim1	pim-1 oncogene	6p21.2	5292		hsa04630:Jak-STAT signaling pathway,hsa05221:Acute myeloid leukemia,
35361_at	Pink1	PTEN induced putative kinase 1	1p36	65018	Parkinson disease (autosomal recessive) 6,Parkinson disease 6, early onset,	hsa05012:Parkinson's disease,
38090_at	PISD	phosphatidylserine decarboxylase	22q12.2	23761		hsa00564:Glycerophospholipid metabolism,
37920_at	pitX1	paired-like homeodomain 1	5q31	5307	Clubfoot, congenital,Many sequence variants affecting diversity of adult human height,
41359_at	PKP3	plakophilin 3	11p15	11187
38134_at	PLAG1	pleiomorphic adenoma gene 1	8q12	5324	Adenomas, salivary gland pleomorphic,Many sequence variants affecting diversity of adult human height,Pleomorphic salivary gland adenoma,
36943_r_at	PLAGL1	pleiomorphic adenoma gene-like 1	6q24-q25	5325	Diabetes mellitus, transient neonatal,
37596_at	Plcd1	phospholipase C, delta 1	3p22-p21.3	5333		hsa00562:Inositol phosphate metabolism,hsa04020:Calcium signaling pathway,hsa04070:Phosphatidylinositol signaling system,
41394_at	PLD2	phospholipase D2	17p13.1	5338		hsa00564:Glycerophospholipid metabolism,hsa00565:Ether lipid metabolism,hsa04144:Endocytosis,hsa04666:Fc gamma R-mediated phagocytosis,hsa04912:GnRH signaling pathway,
34378_at	PLIN2	adipose differentiation-related protein	9p22.1	123
806_at	plk3	polo-like kinase 3 (Drosophila)	1p34.1	1263
39854_r_at	PNPLA2	patatin-like phospholipase domain containing 2	11p15.5	57104	Neutral lipid storage disease with myopathy,
36980_at	PNRC1	proline-rich nuclear receptor coactivator 1	6q15	10957
1696_at	polB	polymerase (DNA directed), beta	8p11.2	5423		hsa03410:Base excision repair,
858_at	por	P450 (cytochrome) oxidoreductase	7q11.2	5447	Adrenal hyperplasia, congenital, due to combined P450C17 and P450C21 deficiency,Antley-Bixler syndrome-like with disordered steroidogenesis,Disordered steroidogenesis, isolated,POR deficiency,
37152_at	Ppard	peroxisome proliferator-activated receptor delta	6p21.2-p21.1	5467		hsa03320:PPAR signaling pathway,hsa04310:Wnt signaling pathway,hsa05200:Pathways in cancer,hsa05221:Acute myeloid leukemia,
37104_at	PPARG	peroxisome proliferator-activated receptor gamma	3p25	5468	A genome-wide association study of type 2 diabetes in Finns detects multiple susceptibility variants,Carotid intimal medial thickness 1,Diabetes mellitus, insulin-resistant, with acanthosis nigricans and hypertension,Diabetes, type 2,Genome-wide association analysis identifies loci for type 2 diabetes and triglyceride levels,Glioblastoma, susceptibility to,Insulin resistance, severe, digenic,Lipo…	hsa03320:PPAR signaling pathway,hsa05016:Huntington's disease,hsa05200:Pathways in cancer,hsa05216:Thyroid cancer,
41435_at	PPFIA3	protein tyrosine phosphatase, receptor type, f polypeptide (PTPRF), interacting protein (liprin), alpha 3	19q13.33	8541
41709_at	Ppfibp2	PTPRF interacting protein, binding protein 2 (liprin beta 2)	11p15.4	8495
40840_at	PPIF	peptidylprolyl isomerase F	10q22-q23	10105
36890_at	ppl	periplakin	16p13.3	5493
36501_at, 857_at	PPM1A	protein phosphatase 1A (formerly 2C), magnesium-dependent, alpha isoform	14q23.1	5494		hsa04010:MAPK signaling pathway,
37107_at	PPM1D	protein phosphatase 1D magnesium-dependent, delta isoform	17q23.2	8493	Breast cancer,	hsa04115:p53 signaling pathway,
37725_at	Ppp1cc	protein phosphatase 1, catalytic subunit, gamma isoform	12q24.1-q24.2	5501		hsa04114:Oocyte meiosis,hsa04270:Vascular smooth muscle contraction,hsa04510:Focal adhesion,hsa04720:Long-term potentiation,hsa04810:Regulation of actin cytoskeleton,hsa04910:Insulin signaling pathway,
36538_at	PPP1R13B	protein phosphatase 1, regulatory (inhibitor) subunit 13B	14q32.33	23368
37028_at	PPP1R15A	protein phosphatase 1, regulatory (inhibitor) subunit 15A	19q13.2	23645
237_s_at	PPP2CA	protein phosphatase 2 (formerly 2A), catalytic subunit, alpha isoform	5q31.1	5515		hsa04114:Oocyte meiosis,hsa04310:Wnt signaling pathway,hsa04350:TGF-beta signaling pathway,hsa04530:Tight junction,hsa04730:Long-term depression,
635_s_at	PPP2R5B	protein phosphatase 2, regulatory subunit B', beta isoform	11q12-q13	5526		hsa04114:Oocyte meiosis,hsa04310:Wnt signaling pathway,
38108_at	Ppt2	palmitoyl-protein thioesterase 2	6p21.3	9374		hsa00062:Fatty acid elongation in mitochondria,hsa04142:Lysosome,
31779_s_at	PRDM1	PR domain containing 1, with ZNF domain	6q21-q22.1	639
315_at	PRDM2	PR domain containing 2, with ZNF domain	1p36.21	7799
38984_at	PREPL	prolyl endopeptidase-like	2p21	9581	Homozygous 2p16 deletion syndrome,
1267_at	PRKCH	protein kinase C, eta	14q22-q23	5583	Cerebral infarction, susceptibility to,	hsa04270:Vascular smooth muscle contraction,hsa04530:Tight junction,
39675_at	Prrg2	proline rich Gla (G-carboxyglutamic acid) 2	19q13.33	5639
32796_f_at	PRSS1 Try6	protease, serine, 1 (trypsin 1); trypsinogen C	7q32-qter 7q32-qter|7q34 7q34	154754 5644	Pancreatitis, hereditary,Trypsinogen deficiency,	hsa04080:Neuroactive ligand-receptor interaction,
34894_r_at	Prss22	protease, serine, 22	16p13.3	64063
40043_at	prss3	protease, serine, 3	9p11.2	5646		hsa04080:Neuroactive ligand-receptor interaction,
634_at	PRSS8	protease, serine, 8	16p11.2	5652
34702_f_at	psiTPTE22	TPTE pseudogene	22q11.1	387590
31675_s_at	pten PTENP1	phosphatase and tensin homolog; phosphatase and tensin homolog pseudogene 1	10q23.3 9p21	11191 5728	Bannayan-Riley-Ruvalcaba syndrome,chromosome 10q23 deletion syndrome,Cowden disease,Endometrial carcinoma,Juvenile polyposis syndrome, infantile form,Lhermitte-Duclos syndrome,Macrocephaly/autism syndrome,Meningioma,Oligodendroglioma,Prostate cancer,Proteus syndrome,Thyroid carcinoma, follicular,VATER association with hydrocephalus,	hsa00562:Inositol phosphate metabolism,hsa04070:Phosphatidylinositol signaling system,hsa04115:p53 signaling pathway,hsa04510:Focal adhesion,hsa04530:Tight junction,hsa05200:Pathways in cancer,hsa05213:Endometrial cancer,hsa05214:Glioma,hsa05215:Prostate cancer,hsa05218:Melanoma,hsa05222:Small cell lung cancer,
32688_at, 39616_at	PTGER3	prostaglandin E receptor 3 (subtype EP3)	1p31.2	5733		hsa04020:Calcium signaling pathway,hsa04080:Neuroactive ligand-receptor interaction,
33559_at	PTK6	PTK6 protein tyrosine kinase 6	20q13.3	5753
843_at	ptp4a1	protein tyrosine phosphatase type IVA, member 1	6q12	7803
40524_at, 1320_at	PTPN21	protein tyrosine phosphatase, non-receptor type 21	14q31.3	11099
40520_g_at	Ptprc	protein tyrosine phosphatase, receptor type, C	1q31-q32	5788	Hepatitic C virus, susceptibility to,Multiple sclerosis, susceptibility to,Severe combined immunodeficiency due to PTPRC deficiency,Severe combined immunodeficiency, T cell-negative, B-cell/natural killer-cell positive,	hsa04514:Cell adhesion molecules (CAMs),hsa04660:T cell receptor signaling pathway,hsa04666:Fc gamma R-mediated phagocytosis,hsa05340:Primary immunodeficiency,
32156_at	PVRL2	poliovirus receptor-related 2 (herpesvirus entry mediator B)	19q13.2	5819	A genome-wide association study for late-onset Alzheimer's disease using DNA pooling,	hsa04514:Cell adhesion molecules (CAMs),hsa04520:Adherens junction,
1257_s_at	Qsox1	quiescin Q6 sulfhydryl oxidase 1	1q24	5768
36660_at	Rab11a	RAB11A, member RAS oncogene family	15q21.3-q22.31	8766		hsa04144:Endocytosis,
33326_at	rab21	RAB21, member RAS oncogene family	12q21.1	23011
808_at	RAB27B	RAB27B, member RAS oncogene family	18q21.2	5874
1201_at	rab33a	RAB33A, member RAS oncogene family	Xq25	9363
33477_at	RAB40A	RAB40A, member RAS oncogene family	Xq22.1	142684
36110_at, 600_at	rab5a	RAB5A, member RAS oncogene family	3p24-p22	5868		hsa04144:Endocytosis,hsa05014:Amyotrophic lateral sclerosis (ALS),
39628_at	RAB9A	RAB9A, member RAS oncogene family	Xp22.2	9367
35289_at	RABGAP1	RAB GTPase activating protein 1	9q33.2	23637
1917_at, 38743_f_at	RAF1	v-raf-1 murine leukemia viral oncogene homolog 1	3p25	5894	LEOPARD syndrome 2,Noonan syndrome 5,	hsa04010:MAPK signaling pathway,hsa04012:ErbB signaling pathway,hsa04062:Chemokine signaling pathway,hsa04270:Vascular smooth muscle contraction,hsa04370:VEGF signaling pathway,hsa04510:Focal adhesion,hsa04540:Gap junction,hsa04650:Natural killer cell mediated cytotoxicity,hsa04660:T cell receptor signaling pathway,hsa04662:B cell receptor signaling pathway,hsa04664:Fc epsilon RI signaling pathwa…
34254_at	RALGDS	ral guanine nucleotide dissociation stimulator	9q34.3	5900		hsa05200:Pathways in cancer,hsa05210:Colorectal cancer,hsa05212:Pancreatic cancer,
36437_s_at	RANBP9	RAN binding protein 9	6p23	10048
1132_s_at, 1587_at	rarg	retinoic acid receptor, gamma	12q13	5916
1042_at, 33505_at	RARRES1	retinoic acid receptor responder (tazarotene induced) 1	3q25.32-q25.33	5918
32177_s_at	RASA4 RASA4P	RAS p21 protein activator 4; RAS p21 protein activator 4 pseudogene	7p13 7q22	10156 401331
37933_at, 38265_at, 38266_at	RBBP6	retinoblastoma binding protein 6	16p12.2	5930
1297_at	Rbpms	RNA binding protein with multiple splicing	8p12-p11	11030
32168_s_at	RCAN1	regulator of calcineurin 1	21q22.1-q22.2 21q22.1-q22.2|21q22.12	1827
1856_at	rel	v-rel reticuloendotheliosis viral oncogene homolog (avian)	2p13-p12	5966
39156_at	Rfpl3s	RFPL3 antisense RNA (non-protein coding)	22q12.3	10737
37701_at	RGS2	regulator of G-protein signaling 2, 24kDa	1q31	5997
1826_at	RHOB	ras homolog gene family, member B	2p24	388
38331_at	Rit1	Ras-like without CAAX 1	1q22	6016	Does parental expressed emotion moderate genetic effects in ADHD? An exploration using a genome wide association scan,
41852_at	rlf	rearranged L-myc fusion	1p32	6018
36580_at	Rmnd5a	required for meiotic nuclear division 5 homolog A (S. cerevisiae)	2p11.2	64795
644_at	RND2	Rho family GTPase 2	17q21	8153
35803_at	rnd3	Rho family GTPase 3	2q23.3	390
40140_at	RNF103 VPS24	vacuolar protein sorting 24 homolog (S. cerevisiae); ring finger protein 103	2p11.2 2p24.3-p24.1	51652 7844		hsa04144:Endocytosis,
39150_at	RNF11	ring finger protein 11	1pter-p22.1	26994
41179_at	RNF44	ring finger protein 44	5q35.2	22838
32899_s_at	RORA	RAR-related orphan receptor A	15q21.3	6095
2037_s_at	RPS6KB1	ribosomal protein S6 kinase, 70kDa, polypeptide 1	17q23.1	6198		hsa04012:ErbB signaling pathway,hsa04150:mTOR signaling pathway,hsa04350:TGF-beta signaling pathway,hsa04666:Fc gamma R-mediated phagocytosis,hsa04910:Insulin signaling pathway,hsa05221:Acute myeloid leukemia,
41374_at	RPS6KB2	ribosomal protein S6 kinase, 70kDa, polypeptide 2	11q13.1	6199		hsa04012:ErbB signaling pathway,hsa04150:mTOR signaling pathway,hsa04350:TGF-beta signaling pathway,hsa04666:Fc gamma R-mediated phagocytosis,hsa04910:Insulin signaling pathway,hsa05221:Acute myeloid leukemia,
1776_at, 39528_at	RRAD	Ras-related associated with diabetes	16q22	6236
32963_s_at	Rragd	Ras-related GTP binding D	6q15-q16	58528
31694_at, 31695_g_at	RSC1A1	regulatory solute carrier protein, family 1, member 1	1p36.1	6248
32800_at, 405_at	RXRA	retinoid X receptor, alpha	9q34.3	6256		hsa03320:PPAR signaling pathway,hsa04920:Adipocytokine signaling pathway,hsa05200:Pathways in cancer,hsa05216:Thyroid cancer,hsa05222:Small cell lung cancer,hsa05223:Non-small cell lung cancer,
38879_at	S100A12	S100 calcium binding protein A12	1q21	6283
34458_at	S100A7	S100 calcium binding protein A7	1q21	6278
41096_at	S100A8	S100 calcium binding protein A8	1q21	6279
41471_at	S100A9	S100 calcium binding protein A9	1q21	6280
34319_at	S100P	S100 calcium binding protein P	4p16	6286
33272_at	SAA1	serum amyloid A1	11p15.1 11p15.1-p14	6288
41644_at	SASH1	SAM and SH3 domain containing 1	6q24.3	23328	A Genome-Wide Association Study Identifies Protein Quantitative Trait Loci (pQTLs),
39835_at	SBF1 SBF1P1	SET binding factor 1; SET binding factor 1 pseudogene 1	22q13.33 8q12.1	100133234 6305
33421_s_at	SC5DL	sterol-C5-desaturase (ERG3 delta-5-desaturase homolog, S. cerevisiae)-like	11q23.3	6309	Lathosterolosis,	hsa00100:Steroid biosynthesis,
35105_at	SCEL	sciellin	13q22	8796
35207_at	SCNN1A	sodium channel, nonvoltage-gated 1 alpha	12p13	6337	Pseudohypoaldosteronism, type I,	hsa04742:Taste transduction,hsa04960:Aldosterone-regulated sodium reabsorption,
39682_at	SCNN1B	sodium channel, nonvoltage-gated 1, beta	16p12.2-p12.1	6338	Liddle syndrome,Pseudohypoaldosteronism, type I,	hsa04742:Taste transduction,hsa04960:Aldosterone-regulated sodium reabsorption,
34462_at	SCNN1D	sodium channel, nonvoltage-gated 1, delta	1p36.3-p36.2	6339
33497_at	SCNN1G	sodium channel, nonvoltage-gated 1, gamma	16p12	6340	Liddle syndrome,Pseudohypoaldosteronism, type I,	hsa04742:Taste transduction,hsa04960:Aldosterone-regulated sodium reabsorption,
41329_at	Scyl3	SCY1-like 3 (S. cerevisiae)	1q24.2	57147
41634_at	secisbp2l	SECIS binding protein 2-like	15q21.1	9728
37007_at	SERINC3	serine incorporator 3	20q13.1-q13.3	10955
1343_s_at, 1549_s_at	Serpinb3	serpin peptidase inhibitor, clade B (ovalbumin), member 3	18q21.3	6317
35577_at	SERPINB7	serpin peptidase inhibitor, clade B (ovalbumin), member 7	18q21.33	8710
36312_at	SERPINB8	serpin peptidase inhibitor, clade B (ovalbumin), member 8	18q21.3	5271
37312_at	SERTAD2	SERTA domain containing 2	2p14	9792
36224_g_at	sfpq	splicing factor proline/glutamine-rich (polypyrimidine tract binding protein associated)	1p34.3	6421
34492_at	SFT2D2	SFT2 domain containing 2	1q24.2	375035
973_at	SGK1	serum/glucocorticoid regulated kinase 1	6q23	6446		hsa04960:Aldosterone-regulated sodium reabsorption,
38968_at	SH3BP5	SH3-domain binding protein 5 (BTK-associated)	3p24.3	9467
39159_at	SH3GL1	SH3-domain GRB2-like 1	19p13.3	6455	Leukemia, acute myeloid,	hsa04144:Endocytosis,
37580_at	SH3GL3	SH3-domain GRB2-like 3	15q24	6457	Identification of ten loci associated with height highlights new biological pathways in human growth,Many sequence variants affecting diversity of adult human height,	hsa04144:Endocytosis,
40614_at	SHB	Src homology 2 domain containing adaptor protein B	9p13.2-p13.1	6461
32160_at	SIAH1	seven in absentia homolog 1 (Drosophila)	16q12	6477		hsa04115:p53 signaling pathway,hsa04120:Ubiquitin mediated proteolysis,hsa04310:Wnt signaling pathway,
33799_at	Siah2	seven in absentia homolog 2 (Drosophila)	3q25	6478
34483_at	SIGLEC6	sialic acid binding Ig-like lectin 6	19q13.3	946
33439_at	Sik1	salt-inducible kinase 1	21q22.3	150094
38327_at	SILV	silver homolog (mouse)	12q13-q14	6490
36843_at	Sipa1	signal-induced proliferation-associated 1	11q13	6494	Metastasis efficiency, modification of,	hsa04670:Leukocyte transendothelial migration,
1866_g_at	Skil	SKI-like oncogene	3q26	6498
40360_at	Slc10a3	solute carrier family 10 (sodium/bile acid cotransporter family), member 3	Xq28	8273
31628_at, 32906_at	Slc15a1	solute carrier family 15 (oligopeptide transporter), member 1	13q33-q34	6564
34759_at	slc30a1	solute carrier family 30 (zinc transporter), member 1	1q32-q41	7779
40364_at	SLC31A1	solute carrier family 31 (copper transporters), member 1	9q31-q32	1317
34749_at	SLC31A2	solute carrier family 31 (copper transporters), member 2	9q31-q32	1318
35906_at	SLC5A1	solute carrier family 5 (sodium/glucose cotransporter), member 1	22q13.1 22q13.1|22q12.3	6523	Glucose/galactose malabsorption,
37451_at	SLCO3A1	solute carrier organic anion transporter family, member 3A1	15q26	28232	Whole genome association study identifies polymorphisms associated with QT prolongation during iloperidone treatment of schizophrenia,
32275_at	Slpi	secretory leukocyte peptidase inhibitor	20q12	6590
31705_at	SLURP1	secreted LY6/PLAUR domain containing 1	8q24.3	57152	Meleda disease,
39770_at	SMG7	Smg-7 homolog, nonsense mediated mRNA decay factor (C. elegans)	1q25	9887
1649_at, 1650_g_at	SMOX	spermine oxidase	20p13	54498
32574_at	SMPD1	sphingomyelin phosphodiesterase 1, acid lysosomal	11p15.4-p15.1	6609	Niemann-Pick disease, type A,Niemann-Pick disease, type B,	hsa00600:Sphingolipid metabolism,hsa04142:Lysosome,
39950_at	smpdl3a	sphingomyelin phosphodiesterase, acid-like 3A	6q22.31	10924
37504_at	SMURF1	SMAD specific E3 ubiquitin protein ligase 1	7q22.1	57154		hsa04120:Ubiquitin mediated proteolysis,hsa04144:Endocytosis,hsa04350:TGF-beta signaling pathway,
40753_at	SNCB	synuclein, beta	5q35	6620	Dementia, Lewy body,
37718_at, 481_at	Snrk	SNF related kinase	3p22.1	54861
38763_at	sorD	sorbitol dehydrogenase	15q15.3	6652		hsa00051:Fructose and mannose metabolism,
33108_i_at	SOX2	SRY (sex determining region Y)-box 2	3q26.3-q27	6657	Microphthalmia, syndromic 3,Optic nerve hypoplasia and abnormalities of the central nervous system,
36744_at	SPAG1	sperm associated antigen 1	8q22.2	6674
40315_at	SPINK5	serine peptidase inhibitor, Kazal type 5	5q32	11005	Atopy,Netherton syndrome,
33448_at	Spint1	serine peptidase inhibitor, Kunitz type 1	15q15.1	6692
33546_at	Sprr1a	small proline-rich protein 1A	1q21-q22	6698
37160_at	Sprr1b	small proline-rich protein 1B (cornifin)	1q21-q22	6699
36242_at	SPRR2C Sprr2g	small proline-rich protein 2C (pseudogene); small proline-rich protein 2G	1q21-q22	6702 6706
36734_at	SPRR2D	small proline-rich protein 2D	1q21-q22	6703
32668_at	SSBP2	single-stranded DNA binding protein 2	5q14.1	23635
40598_at	STARD5	StAR-related lipid transfer (START) domain containing 5	15q26	80765
40473_at	stk24	serine/threonine kinase 24 (STE20 homolog, yeast)	13q31.2-q32.3	8428
36217_at	stk38	serine/threonine kinase 38	6p21	11329
33298_at	strN	striatin, calmodulin binding protein	2p22-p21	6801
39857_at, 39858_s_at	STX11	syntaxin 11	6q24.2	8676	Hemophagocytic lymphohistiocytosis, familial, 4,	hsa04130:SNARE interactions in vesicular transport,
41034_s_at	SULT2B1	sulfotransferase family, cytosolic, 2B, member 1	19q13.3	6820		hsa00140:Steroid hormone biosynthesis,hsa00150:Androgen and estrogen metabolism,hsa00920:Sulfur metabolism,
33205_at	Supt3h	suppressor of Ty 3 homolog (S. cerevisiae)	6p21.1-p21.3	8464	Many sequence variants affecting diversity of adult human height,
35354_at	SYNGR1	synaptogyrin 1	22q13.1	9145
38980_at	tab2	mitogen-activated protein kinase kinase kinase 7 interacting protein 2	6q25.1-q25.3	23118	Genome-wide association and linkage analyses of hemostatic factors and hematological phenotypes in the Framingham Heart Study,	hsa04010:MAPK signaling pathway,hsa04620:Toll-like receptor signaling pathway,hsa04621:NOD-like receptor signaling pathway,
38816_at	TACC2	transforming, acidic coiled-coil containing protein 2	10q26	10579
291_s_at, 41286_at	TACSTD2	tumor-associated calcium signal transducer 2	1p32-p31	4070	Corneal dystrophy, gelatinous drop-like,
39742_at	TANK	TRAF family member-associated NFKB activator	2q24-q31	10010		hsa04622:RIG-I-like receptor signaling pathway,
36320_at	TBC1D12	TBC1 domain family, member 12	10q23.33	23232
37503_at	tbc1d30	TBC1 domain family, member 30	12q14.3	23329
36702_at	Tbx19	T-box 19	1q24.2	9095	Adrenocorticotropic hormone deficiency,
35919_at	TCN1	transcobalamin I (vitamin B12 binding protein, R binder family)	11q11-q12	6947
35380_at	TEAD1	TEA domain family member 1 (SV40 transcriptional enhancer factor)	11p15.2	7003	Sveinsson choreoretinal atrophy,
33808_at	TEAD3	TEA domain family member 3	6p21.2	7005
1596_g_at	TEK	TEK tyrosine kinase, endothelial	9p21	7010	Venous malformations, multiple cutaneous and mucosal,
160025_at	TGFA	transforming growth factor, alpha	2p13	7039		hsa04012:ErbB signaling pathway,hsa05200:Pathways in cancer,hsa05211:Renal cell carcinoma,hsa05212:Pancreatic cancer,hsa05214:Glioma,hsa05215:Prostate cancer,hsa05223:Non-small cell lung cancer,
35947_at	Tgm1	transglutaminase 1 (K polypeptide epidermal type I, protein-glutamine-gamma-glutamyltransferase)	14q11.2	7051	Ichthyosiform erythroderma, congenital,Ichthyosis, lamellar, autosomal recessive,Self-healing collodion baby,
32868_at	TGM3	transglutaminase 3 (E polypeptide, protein-glutamine-gamma-glutamyltransferase)	20q11.2	7053
33001_s_at	Tgm5	transglutaminase 5	15q15.2	9333	peeling skin syndrome (PSS),Peeling skin syndrome, acral type,
33803_at	THBD	thrombomodulin	20p11.2	7056	Myocardial infarction, susceptibility to,Thrombophilia due to thrombomodulin defect,	hsa04610:Complement and coagulation cascades,
31637_s_at	thrA	thyroid hormone receptor, alpha (erythroblastic leukemia viral (v-erb-a) oncogene homolog, avian)	17q11.2	7067	Pituitary adenoma, nonfunctioning,	hsa04080:Neuroactive ligand-receptor interaction,
37460_at, 38370_at	tiam1	T-cell lymphoma invasion and metastasis 1	21q22.1 21q22.1|21q22.11	7074		hsa04062:Chemokine signaling pathway,hsa04810:Regulation of actin cytoskeleton,
1375_s_at	timp2	TIMP metallopeptidase inhibitor 2	17q25	7077
36655_at	TJP2	tight junction protein 2 (zona occludens 2)	9q13-q21	9414	Hypercholanemia, familial,	hsa04530:Tight junction,hsa05110:Vibrio cholerae infection,
38234_at	TLE3	transducin-like enhancer of split 3 (E(sp1) homolog, Drosophila)	15q22	7090
40692_at, 38364_at	Tle4	transducin-like enhancer of split 4 (E(sp1) homolog, Drosophila)	9q21.31	7091
35628_at	tm7sf2	transmembrane 7 superfamily member 2	11q13	7108		hsa00100:Steroid biosynthesis,
38274_at	Tmem115	transmembrane protein 115	3p21.3	11070
39033_at	tmem59	transmembrane protein 59	1p36-p31	9528
31345_at	TMPRSS11D	transmembrane protease, serine 11D	4q13.2	9407
38631_at	TNFAIP2	tumor necrosis factor, alpha-induced protein 2	14q32	7127
1715_at	TNFSF10	tumor necrosis factor (ligand) superfamily, member 10	3q26	8743		hsa04060:Cytokine-cytokine receptor interaction,hsa04210:Apoptosis,hsa04650:Natural killer cell mediated cytotoxicity,
38970_s_at	Tnip1	TNFAIP3 interacting protein 1	5q32-q33.1	10318
40631_at	Tob1	transducer of ERBB2, 1	17q21	10140
34533_at	TOM1L2	target of myb1-like 2 (chicken)	17p11.2	146691
1030_s_at, 1710_s_at	TOP1	topoisomerase (DNA) I	20q12-q13.1	7150	DNA topoisomerase I, camptothecin-resistant,
31680_at	TOP1P2	topoisomerase (DNA) I pseudogene 2	22q11.2-q13.1	7152
35597_at	TRIB1	tribbles homolog 1 (Drosophila)	8q24.13	10221	Common variants at 30 loci contribute to polygenic dyslipidemia,Loci influencing lipid levels and coronary heart disease risk in 16 European population cohorts,Newly identified loci that influence lipid concentrations and risk of coronary artery disease,Six new loci associated with blood low-density lipoprotein cholesterol, high-density lipoprotein cholesterol or triglycerides in humans,
38881_i_at, 38882_r_at	Trim16	tripartite motif-containing 16	17p11.2	10626
37537_at	trim23	tripartite motif-containing 23	5q12.3	373
1617_at	TRIM25	tripartite motif-containing 25	17q23.2	7706	Many sequence variants affecting diversity of adult human height,	hsa04622:RIG-I-like receptor signaling pathway,
1898_at	TRIM29	tripartite motif-containing 29	11q22-q23	23650
32635_at, 35187_at	trim33	tripartite motif-containing 33	1p13.1	51592	Thyroid carcinoma, papillary,
41788_i_at, 41787_at, 41789_r_at	TSC22D2	TSC22 domain family, member 2	3q25.1	9819
33835_at	TSPYL4	TSPY-like 4	6q22.1	23270
36123_at	TST	thiosulfate sulfurtransferase (rhodanese)	22q13.1	7263
41680_at	TTC39A	tetratricopeptide repeat domain 39A	1p32.3	22996
37533_r_at	ttc9	tetratricopeptide repeat domain 9	14q24.2	23508
34825_at	Ttrap	TRAF and TNF receptor associated protein	6p22.3-p22.1	51567
297_g_at, 296_at, 39331_at	Tubb2a	tubulin, beta 2A	6p25	7280		hsa04540:Gap junction,hsa05130:Pathogenic Escherichia coli infection,
33683_at	TUG1	taurine upregulated 1 (non-protein coding)	22q12.2	55000
31508_at	TXNIP	thioredoxin interacting protein	1q21.1	10628
2086_s_at, 1063_s_at, 35246_at	tyro3	TYRO3 protein tyrosine kinase	15q15.1-q21.1	7301
37662_at, 1423_at	ube2g1	ubiquitin-conjugating enzyme E2G 1 (UBC7 homolog, yeast)	1q42	7326		hsa04120:Ubiquitin mediated proteolysis,hsa05012:Parkinson's disease,
369_s_at	Ube2h	ubiquitin-conjugating enzyme E2H (UBC8 homolog, yeast)	7q32	7328		hsa04120:Ubiquitin mediated proteolysis,
40839_at	ubl3	ubiquitin-like 3	13q12-q13	5412
34824_at	UBQLN2	ubiquilin 2	Xp11.23-p11.1	29978
33860_at	UBR4	ubiquitin protein ligase E3 component n-recognin 4	1p36.13	23352
37244_at	Uchl3	ubiquitin carboxyl-terminal esterase L3 (ubiquitin thiolesterase)	13q22.2	7347
40214_at, 40215_at	UGCG	UDP-glucose ceramide glucosyltransferase	9q31	7357		hsa00600:Sphingolipid metabolism,
34827_at	ULK1	unc-51-like kinase 1 (C. elegans)	12q24.3	8408		hsa04140:Regulation of autophagy,hsa04150:mTOR signaling pathway,
37351_at	upp1	uridine phosphorylase 1	7p12.3	7378		hsa00240:Pyrimidine metabolism,hsa00983:Drug metabolism,
39112_at	USF2	upstream transcription factor 2, c-fos interacting	19q13	7392
34901_at	USP2	ubiquitin specific peptidase 2	11q23.3	9099
1357_at	USP4	ubiquitin specific peptidase 4 (proto-oncogene)	3p21.3	7375
1614_s_at	usp6	ubiquitin specific peptidase 6 (Tre-2 oncogene)	17p13	9098
34594_at	USP6NL	USP6 N-terminal like	10p13	9712
34477_at	UTY	ubiquitously transcribed tetratricopeptide repeat gene, Y-linked	Yq11	7404
36101_s_at	VEGFA	vascular endothelial growth factor A	6p12	7422	Diabetic retinopathy, NIDDM-related, susceptibility to,Meta-analysis of genome-wide association data and large-scale replication identifies additional susceptibility loci for type 2 diabetes,Microvascular complications of diabetes 1,	hsa04060:Cytokine-cytokine receptor interaction,hsa04150:mTOR signaling pathway,hsa04370:VEGF signaling pathway,hsa04510:Focal adhesion,hsa05200:Pathways in cancer,hsa05211:Renal cell carcinoma,hsa05212:Pancreatic cancer,hsa05219:Bladder cancer,
37123_at	VILL	villin-like	3p21.3	50853
33766_at	VIPR1	vasoactive intestinal peptide receptor 1	3p22	7433		hsa04080:Neuroactive ligand-receptor interaction,
37804_at	VPS4B	vacuolar protein sorting 4 homolog B (S. cerevisiae)	18q21.32-q21.33	9525		hsa04144:Endocytosis,
321_at, 39875_at	WASL	Wiskott-Aldrich syndrome-like	7q31.3 7q31.31	8976		hsa04062:Chemokine signaling pathway,hsa04520:Adherens junction,hsa04666:Fc gamma R-mediated phagocytosis,hsa04810:Regulation of actin cytoskeleton,hsa05130:Pathogenic Escherichia coli infection,
33350_s_at	wdr45	WD repeat domain 45	Xp11.23	11152
37475_at	Wdr62	WD repeat domain 62	19q13.12	284403
40787_at	WIPF2	WAS/WASL interacting protein family, member 2	17q21.2	147179
33392_at	wipi2	WD repeat domain, phosphoinositide interacting 2	7p22.1	26100
31862_at, 1669_at	WNT5A	wingless-type MMTV integration site family, member 5A	3p21-p14	7474		hsa04310:Wnt signaling pathway,hsa04340:Hedgehog signaling pathway,hsa04916:Melanogenesis,hsa05200:Pathways in cancer,hsa05217:Basal cell carcinoma,
40928_at	WSB1	WD repeat and SOCS box-containing 1	17q11.1	26118
34213_at	WWC1	WW and C2 domain containing 1	5q35.1	23286	Memory, enhanced, association with,
39756_g_at	Xbp1	X-box binding protein 1	22q12.1	7494	Bipolar disorder, susceptibility to,Major affective disorder-7, susceptibility to,
1995_at	xpa	xeroderma pigmentosum, complementation group A	9q22.3	7507	Xeroderma pigmentosum, group A,	hsa03420:Nucleotide excision repair,
817_at	YAF2	YY1 associated factor 2	12q12	10138
41843_r_at	YIPF4	Yip1 domain family, member 4	2p22.3	84272
39897_at, 40711_at	YTHDC1	YTH domain containing 1	4q13.2	91746
41532_at	ZBTB17	zinc finger and BTB domain containing 17	1p36.2-p36.1	7709		hsa04110:Cell cycle,
41695_at	ZBTB43	zinc finger and BTB domain containing 43	9q33-q34	23099
39540_at	ZBTB7A	zinc finger and BTB domain containing 7A	19p13.3	51341
40933_f_at	ZDHHC18	zinc finger, DHHC-type containing 18	1p36.11	84243
40448_at	ZFP36	zinc finger protein 36, C3H type, homolog (mouse)	19q13.1	7538
38931_at	ZFX	zinc finger protein, X-linked	Xp21.3 Yp11.3	7543
35848_at	Zmiz1	zinc finger, MIZ-type containing 1	10q22.3	57178
36783_f_at	ZNF117	zinc finger protein 117	7q11.21	51351
32139_at	ZNF185	zinc finger protein 185 (LIM domain)	Xq28	7739
38142_at	ZNF211	zinc finger protein 211	19q13.4	10520
41426_at	ZNF212	zinc finger protein 212	7q36.1	7988
32034_at	ZNF217	zinc finger protein 217	20q13.2	7764
35572_f_at	ZNF253	zinc finger protein 253	19p13.11	56242
35019_at	ZNF254	zinc finger protein 254	19p12	9534
35026_f_at	ZNF273	zinc finger protein 273	7q11.21	10793
40838_at	znf292	zinc finger protein 292	6q15	23036
32267_at	ZNF345	zinc finger protein 345	19q13.12	25850
33982_f_at	ZNF43	zinc finger protein 43	19p13.1-p12	7594
35408_i_at	ZNF44	zinc finger protein 44	19p13.2	51710
31553_at	ZNF460	zinc finger protein 460	19q13.4	10794
39891_at	ZNF710	zinc finger protein 710	15q26.1	374655
933_f_at, 932_i_at	ZNF91	zinc finger protein 91	19p13.1-p12	7644
41243_at		similar to solute carrier family 35, member E2	1p36.33	728661
