# Supplementary material for: Keratinocyte Detachment-Differentiation Connection Revisited, or Anoikis-Pityriasi Nexus Redux
Source: PLoS One. 2014 Jun 24;9(6):e100279. doi: 10.1371/journal.pone.0100279 (PMC4069014; doi:10.1371/journal.pone.0100279)
Supplement: Table S2 — Genes overexpressed in attached keratinocytes. (XLSX) [file pone.0100279.s002.xlsx]

## Sheet: Susp_DN_Table
ID	SYMBOL	Gene Name	CYTOBAND	ENTREZ ID	OMIM DISEASE	KEGG PATHWAY
40281_at	Sept2	septin 2	2q37	4735
41220_at	Sept9	septin 9	17q25	10801	Amyotrophy, hereditary neuralgic,Leukemia, acute myeloid, therapy-related,neuritis with brachial predilection,Ovarian carcinoma,
38033_at	Sept10	septin 10	2q13	151011
33172_at, 33173_g_at	Sept11	septin 11	4q21.1	55752
38820_at	SEP15	15 kDa selenoprotein	1p31	9403
35761_at	AASDHPPT	aminoadipate-semialdehyde dehydrogenase-phosphopantetheinyl transferase	11q22	60496		hsa00300:Lysine biosynthesis,hsa00310:Lysine degradation,
32117_at	AATF	apoptosis antagonizing transcription factor	17q11.2-q12	26574
36732_at	ABCC10	ATP-binding cassette, sub-family C (CFTR/MRP), member 10	6p21.1	89845		hsa02010:ABC transporters,
38261_at	Abcc3	ATP-binding cassette, sub-family C (CFTR/MRP), member 3	17q22	8714		hsa02010:ABC transporters,
39355_at	ABCE1 LOC647150	similar to ATP-binding cassette, sub-family E, member 1; ATP-binding cassette, sub-family E (OABP), member 1	1q31.2 4q31	6059 647150
37532_at	ACADM	acyl-Coenzyme A dehydrogenase, C-4 to C-12 straight chain	1p31	34	Acyl-CoA dehydrogenase, medium chain, deficiency of,	hsa00071:Fatty acid metabolism,hsa00280:Valine, leucine and isoleucine degradation,hsa00410:beta-Alanine metabolism,hsa00640:Propanoate metabolism,hsa03320:PPAR signaling pathway,
34790_at	Acat2	acetyl-Coenzyme A acetyltransferase 2	6q25.3	39		hsa00071:Fatty acid metabolism,hsa00072:Synthesis and degradation of ketone bodies,hsa00280:Valine, leucine and isoleucine degradation,hsa00310:Lysine degradation,hsa00380:Tryptophan metabolism,hsa00620:Pyruvate metabolism,hsa00640:Propanoate metabolism,hsa00650:Butanoate metabolism,hsa00900:Terpenoid backbone biosynthesis,
40881_at	ACLY	ATP citrate lyase	17q12-q21	47		hsa00020:Citrate cycle (TCA cycle),
40077_at	ACO1	aconitase 1, soluble	9p22-q32 9p22-q32|9p21.1	48		hsa00020:Citrate cycle (TCA cycle),hsa00630:Glyoxylate and dicarboxylate metabolism,
37945_at	ACOT7	acyl-CoA thioesterase 7	1p36.31-p36.11	11332		hsa01040:Biosynthesis of unsaturated fatty acids,
36611_at	acp1	acid phosphatase 1, soluble	2p25	52		hsa00740:Riboflavin metabolism,hsa04520:Adherens junction,
33880_at, 33881_at	ACSL3	acyl-CoA synthetase long-chain family member 3	2q34-q35	2181		hsa00071:Fatty acid metabolism,hsa03320:PPAR signaling pathway,hsa04920:Adipocytokine signaling pathway,
38099_r_at	Acsl4	acyl-CoA synthetase long-chain family member 4	Xq22.3-q23	2182	Mental retardation, X-linked 68,Mental retardation, X-linked nonspecific, 63,	hsa00071:Fatty acid metabolism,hsa03320:PPAR signaling pathway,hsa04920:Adipocytokine signaling pathway,
32755_at	acta2	actin, alpha 2, smooth muscle, aorta	10q23.3	59	Aortic aneurysm, familial thoracic 6,	hsa04270:Vascular smooth muscle contraction,
AFFX-HSAC07/X00351_M_at, AFFX-HSAC07/X00351_5_at, AFFX-HSAC07/X00351_3_at, 32318_s_at	ACTB	actin, beta	7p15-p12	60	Dystonia, juvenile-onset,	hsa04510:Focal adhesion,hsa04520:Adherens junction,hsa04530:Tight junction,hsa04670:Leukocyte transendothelial migration,hsa04810:Regulation of actin cytoskeleton,hsa05110:Vibrio cholerae infection,hsa05130:Pathogenic Escherichia coli infection,hsa05410:Hypertrophic cardiomyopathy (HCM),hsa05412:Arrhythmogenic right ventricular cardiomyopathy (ARVC),hsa05414:Dilated cardiomyopathy,hsa05416:Viral …
34160_at	ACTG1	actin, gamma 1	17q25	71	Deafness, autosomal dominant 20/26,	hsa04510:Focal adhesion,hsa04520:Adherens junction,hsa04530:Tight junction,hsa04670:Leukocyte transendothelial migration,hsa04810:Regulation of actin cytoskeleton,hsa05110:Vibrio cholerae infection,hsa05130:Pathogenic Escherichia coli infection,hsa05410:Hypertrophic cardiomyopathy (HCM),hsa05412:Arrhythmogenic right ventricular cardiomyopathy (ARVC),hsa05414:Dilated cardiomyopathy,hsa05416:Viral …
41278_at	actl6a	actin-like 6A	3q26.33	86
39329_at, 39330_s_at	actn1	actinin, alpha 1	14q24.1-q24.2 14q24.1-q24.2|14q24|14q22-q24	87		hsa04510:Focal adhesion,hsa04520:Adherens junction,hsa04530:Tight junction,hsa04670:Leukocyte transendothelial migration,hsa04810:Regulation of actin cytoskeleton,hsa05322:Systemic lupus erythematosus,hsa05412:Arrhythmogenic right ventricular cardiomyopathy (ARVC),
41753_at	actn4	actinin, alpha 4	19q13	81	Glomerulosclerosis, focal segmental, 1,	hsa04510:Focal adhesion,hsa04520:Adherens junction,hsa04530:Tight junction,hsa04670:Leukocyte transendothelial migration,hsa04810:Regulation of actin cytoskeleton,hsa05322:Systemic lupus erythematosus,hsa05412:Arrhythmogenic right ventricular cardiomyopathy (ARVC),
35733_at, 35734_at	Actr2	ARP2 actin-related protein 2 homolog (yeast)	2p14	10097
35271_at	ACTR3	ARP3 actin-related protein 3 homolog (yeast)	2q14.1	10096
37713_at	ACY1	aminoacylase 1	3p21.1	95	Aminoacylase 1 deficiency,	hsa00330:Arginine and proline metabolism,
40712_at	Adam8	ADAM metallopeptidase domain 8	10q26.3	101
34761_r_at	Adam9	ADAM metallopeptidase domain 9 (meltrin gamma)	8p11.23	8754
38014_at	Adar	adenosine deaminase, RNA-specific	1q21.1-q21.2	103	Dyschromatosis symmetrica hereditaria,	hsa04623:Cytosolic DNA-sensing pathway,
37708_r_at, 37707_i_at	ADH5 ADH5P4	alcohol dehydrogenase 5 (class III), chi polypeptide, pseudogene 4; alcohol dehydrogenase 5 (class III), chi polypeptide	4q21-q25 6q12	128 642443		hsa00010:Glycolysis / Gluconeogenesis,hsa00071:Fatty acid metabolism,hsa00350:Tyrosine metabolism,hsa00680:Methane metabolism,hsa00830:Retinol metabolism,hsa00980:Metabolism of xenobiotics by cytochrome P450,hsa00982:Drug metabolism,
168_at	adk	adenosine kinase	10q22 10q22|10q11-q24	132		hsa00230:Purine metabolism,
36324_at	Adora2b LOC100131909	hypothetical LOC100131909; adenosine A2b receptor	17p12 17p12-p11.2	100131909 136		hsa04020:Calcium signaling pathway,hsa04080:Neuroactive ligand-receptor interaction,hsa04270:Vascular smooth muscle contraction,
41338_at, 41337_at	aes	amino-terminal enhancer of split	19p13.3	166
37578_at	AFAP1	actin filament associated protein 1	4p16	60312
35067_at	AGGF1	angiogenic factor with G patch and FHA domains 1	5q13.3	55109	Klippel-Trenaunay syndrome,
38253_at, 38252_s_at	agl	amylo-1, 6-glucosidase, 4-alpha-glucanotransferase	1p21	178	Glycogen storage disease IIIa,Glycogen storage disease IIIb,	hsa00500:Starch and sucrose metabolism,
32836_at	AGPAT1	1-acylglycerol-3-phosphate O-acyltransferase 1 (lysophosphatidic acid acyltransferase, alpha)	6p21.3	10554		hsa00561:Glycerolipid metabolism,hsa00564:Glycerophospholipid metabolism,hsa00565:Ether lipid metabolism,
39225_at	AGPS	alkylglycerone phosphate synthase	2q31.2	8540	Rhizomelic chondrodysplasia punctata, type 3,	hsa00565:Ether lipid metabolism,
33454_at	AGRN	agrin	1p36.33	375790		hsa04512:ECM-receptor interaction,
40821_at	ahcY	adenosylhomocysteinase	20cen-q13.1	191	Hypermethioninemia with deficiency of S-adenosylhomocysteine hydrolase,	hsa00270:Cysteine and methionine metabolism,hsa00450:Selenoamino acid metabolism,
37569_at	AHRR pdcd6	aryl-hydrocarbon receptor repressor; programmed cell death 6	5p15.3 5p15.33	10016 57491
40979_at	AHSA1	AHA1, activator of heat shock 90kDa protein ATPase homolog 1 (yeast)	14q24	10598
32212_at	AIFM1	apoptosis-inducing factor, mitochondrion-associated, 1	1p32.3 Xq25-q26	9131		hsa04210:Apoptosis,
39734_at	AIMP1	aminoacyl tRNA synthetase complex-interacting multifunctional protein 1	4q24	9255
41250_at	AIMP2 STAG3L3	aminoacyl tRNA synthetase complex-interacting multifunctional protein 2; stromal antigen 3-like 3	7p22 7q11.23 7q11.23-q21.1	442578 7965
40789_at, 40788_at	Ak2	adenylate kinase 2	1p34	204		hsa00230:Purine metabolism,
37680_at	AKAP12	A kinase (PRKA) anchor protein 12	6q24-q25	9590
35985_at	akap2 PALM2 PALM2-AKAP2	A kinase (PRKA) anchor protein 2; paralemmin 2; PALM2-AKAP2 readthrough transcript	9q31-q33	11217 114299 445815
1564_at	akt1	v-akt murine thymoma viral oncogene homolog 1	14q32.32 14q32.32|14q32.32	207	Breast cancer, somatic,Colorectal cancer, somatic,Ovarian cancer, somatic,Schizophrenia, susceptibility to,	hsa04010:MAPK signaling pathway,hsa04012:ErbB signaling pathway,hsa04062:Chemokine signaling pathway,hsa04150:mTOR signaling pathway,hsa04210:Apoptosis,hsa04370:VEGF signaling pathway,hsa04510:Focal adhesion,hsa04530:Tight junction,hsa04620:Toll-like receptor signaling pathway,hsa04630:Jak-STAT signaling pathway,hsa04660:T cell receptor signaling pathway,hsa04662:B cell receptor signaling pathway…
32747_at	ALDH2	aldehyde dehydrogenase 2 family (mitochondrial)	12q24.2	217	?Fetal alcohol syndrome,Alcohol intolerance, acute,Alcohol sensitivity, acute,Hangover, susceptibility to,Sublingual nitroglycerin, susceptibility to poor response to,	hsa00010:Glycolysis / Gluconeogenesis,hsa00053:Ascorbate and aldarate metabolism,hsa00071:Fatty acid metabolism,hsa00280:Valine, leucine and isoleucine degradation,hsa00310:Lysine degradation,hsa00330:Arginine and proline metabolism,hsa00340:Histidine metabolism,hsa00380:Tryptophan metabolism,hsa00410:beta-Alanine metabolism,hsa00561:Glycerolipid metabolism,hsa00620:Pyruvate metabolism,hsa00640:P…
40409_at	aldh3a2	aldehyde dehydrogenase 3 family, member A2	17p11.2	224	Sjogren-Larsson syndrome,	hsa00010:Glycolysis / Gluconeogenesis,hsa00053:Ascorbate and aldarate metabolism,hsa00071:Fatty acid metabolism,hsa00280:Valine, leucine and isoleucine degradation,hsa00310:Lysine degradation,hsa00330:Arginine and proline metabolism,hsa00340:Histidine metabolism,hsa00380:Tryptophan metabolism,hsa00410:beta-Alanine metabolism,hsa00561:Glycerolipid metabolism,hsa00620:Pyruvate metabolism,hsa00640:P…
37331_g_at	ALDH4A1	aldehyde dehydrogenase 4 family, member A1	1p36	8659	Hyperprolinemia, type II,	hsa00250:Alanine, aspartate and glutamate metabolism,hsa00330:Arginine and proline metabolism,
36132_at	ALDH7A1	aldehyde dehydrogenase 7 family, member A1	5q31	501	Epilepsy, pyridoxine-dependent,	hsa00010:Glycolysis / Gluconeogenesis,hsa00053:Ascorbate and aldarate metabolism,hsa00071:Fatty acid metabolism,hsa00280:Valine, leucine and isoleucine degradation,hsa00310:Lysine degradation,hsa00330:Arginine and proline metabolism,hsa00340:Histidine metabolism,hsa00380:Tryptophan metabolism,hsa00410:beta-Alanine metabolism,hsa00561:Glycerolipid metabolism,hsa00620:Pyruvate metabolism,hsa00640:P…
33899_at	ALDH9A1	aldehyde dehydrogenase 9 family, member A1	1q23.1	223		hsa00010:Glycolysis / Gluconeogenesis,hsa00053:Ascorbate and aldarate metabolism,hsa00071:Fatty acid metabolism,hsa00280:Valine, leucine and isoleucine degradation,hsa00310:Lysine degradation,hsa00330:Arginine and proline metabolism,hsa00340:Histidine metabolism,hsa00380:Tryptophan metabolism,hsa00410:beta-Alanine metabolism,hsa00561:Glycerolipid metabolism,hsa00620:Pyruvate metabolism,hsa00640:P…
32051_at	ALG8	asparagine-linked glycosylation 8, alpha-1,3-glucosyltransferase homolog (S. cerevisiae)	11q14.1	79053	Congenital disorder of glycosylation, type Ih,	hsa00510:N-Glycan biosynthesis,
32919_at	AMIGO2	adhesion molecule with Ig-like domain 2	12q13.11	347902
38687_at	ANAPC13	anaphase promoting complex subunit 13	3q22.1	25847	Genome-wide association analysis identifies 20 loci that influence adult height,	hsa04110:Cell cycle,hsa04114:Oocyte meiosis,hsa04120:Ubiquitin mediated proteolysis,hsa04914:Progesterone-mediated oocyte maturation,
31852_at	ANKMY2	ankyrin repeat and MYND domain containing 2	7p21	57037
36427_at	ANKRD40	ankyrin repeat domain 40	17q21.33	91369
37034_at	ANP32A LOC723972	hepatopoietin PCn127; acidic (leucine-rich) nuclear phosphoprotein 32 family, member A	15q14 15q22.3-q23	723972 8125
38479_at	anp32b LOC646791	similar to Acidic leucine-rich nuclear phosphoprotein 32 family member B (PHAPI2 protein) (Silver-stainable protein SSP29) (Acidic protein rich in leucines); acidic (leucine-rich) nuclear phosphoprotein 32 family, member B	15q24.2 9q22.32	10541 646791
40348_s_at, 40347_at	ANP32E	acidic (leucine-rich) nuclear phosphoprotein 32 family, member E	1q21.2	81611
39385_at	ANPEP	alanyl (membrane) aminopeptidase	15q25-q26	290		hsa00480:Glutathione metabolism,hsa04614:Renin-angiotensin system,hsa04640:Hematopoietic cell lineage,
36637_at	anxa11	annexin A11	10q23	311
31684_at, 757_at, 31444_s_at, 769_s_at	ANXA2 ANXA2P1 ANXA2P3	annexin A2 pseudogene 3; annexin A2; annexin A2 pseudogene 1	10q21-q22 15q21-q22 4q21-q31	302 303 305
31792_at	anxa3	annexin A3	4q13-q22	306
37374_at	anxa4	annexin A4	2p13	307
37747_at	ANXA5	annexin A5	4q26-q28 4q26-q28|4q28-q32	308
39082_at	ANXA6	annexin A6	5q32-q34	309
37670_at	Anxa7	annexin A7	10q21.1-q21.2	310
37954_at	ANXA8L2	annexin A8-like 2	10q11.22	244
36161_at	AP2B1	adaptor-related protein complex 2, beta 1 subunit	17q11.2-q12	163		hsa04144:Endocytosis,hsa05016:Huntington's disease,
39795_at	AP2M1	adaptor-related protein complex 2, mu 1 subunit	3q28	1173		hsa04144:Endocytosis,hsa05016:Huntington's disease,
38074_at	ap3s1	adaptor-related protein complex 3, sigma 1 subunit	5q22	1176		hsa04142:Lysosome,
2025_s_at	Apex1	APEX nuclease (multifunctional DNA repair enzyme) 1	14q11.2-q12	328		hsa03410:Base excision repair,
33420_g_at	API5 API5L1	API5-like 1; apoptosis inhibitor 5	11p11.2 Xq24	642812 8539
36015_at	Apitd1 CORT	cortistatin; apoptosis-inducing, TAF9-like domain 1	1p36 1p36.22 1p36|1p36.22	1325 378708
33944_at	aplp2	amyloid beta (A4) precursor-like protein 2	11q23-q25 11q23-q25|11q24	334
39230_at	APOBEC3B	apolipoprotein B mRNA editing enzyme, catalytic polypeptide-like 3B	22q13.1-q13.2	9582
41136_s_at	APP	amyloid beta (A4) precursor protein	21q21.2 21q21.2|21q21.3	351	Alzheimer disease 1, familial,Alzheimer disease-1, APP-related,Amyloidosis, cerebroarterial, Dutch and Italian types,Amyloidosis, cerebroarterial, Dutch type,Amyloidosis, cerebroarterial, Iowa type,Cerebral amyloid angiopathy, Dutch, Italian, Iowa, Flemish, Arctic variants,Dementia, early-onset progressive, autosomal recessive,	hsa05010:Alzheimer's disease,
34898_at	AREG AREGB	amphiregulin; amphiregulin B	4q13-q21 4q13.3	374 727738		hsa04012:ErbB signaling pathway,
39905_i_at	arfgap3	ADP-ribosylation factor GTPase activating protein 3	22q13.2-q13.3	26286		hsa04144:Endocytosis,
36849_at	ARHGAP29	Rho GTPase activating protein 29	1p22.1	9411
40164_at	ARHGDIA	Rho GDP dissociation inhibitor (GDI) alpha	17q25.3	396		hsa04722:Neurotrophin signaling pathway,
1984_s_at	arhgdib	Rho GDP dissociation inhibitor (GDI) beta	12p12.3	397		hsa04722:Neurotrophin signaling pathway,
810_at	Arhgef1	Rho guanine nucleotide exchange factor (GEF) 1	19q13.13	9138		hsa04270:Vascular smooth muscle contraction,hsa04810:Regulation of actin cytoskeleton,
34180_at	arhgef10	Rho guanine nucleotide exchange factor (GEF) 10	8p23	9639	Slowed nerve conduction velocity, AD,
40099_at	Arhgef2	Rho/Rac guanine nucleotide exchange factor (GEF) 2	1q21-q22	9181		hsa05130:Pathogenic Escherichia coli infection,
33198_at	ARL2BP	ADP-ribosylation factor-like 2 binding protein	16q13	23568
39829_at	Arl4c	ADP-ribosylation factor-like 4C	2q37.1	10123
39091_at	ARL6IP5	ADP-ribosylation-like factor 6 interacting protein 5	3p14	10550
36057_at	ARMCX2	armadillo repeat containing, X-linked 2	Xq21.33-q22.2	9823
39043_at	ARPC1B LOC653888	actin related protein 2/3 complex, subunit 1B, 41kDa; similar to Actin-related protein 2/3 complex subunit 1B (ARP2/3 complex 41 kDa subunit) (p41-ARC)	7 7q22.1	10095 653888		hsa04666:Fc gamma R-mediated phagocytosis,hsa04810:Regulation of actin cytoskeleton,hsa05130:Pathogenic Escherichia coli infection,
1718_at	arpc2	actin related protein 2/3 complex, subunit 2, 34kDa	2q36.1	10109		hsa04666:Fc gamma R-mediated phagocytosis,hsa04810:Regulation of actin cytoskeleton,hsa05130:Pathogenic Escherichia coli infection,
38392_at	ARPC5	actin related protein 2/3 complex, subunit 5, 16kDa	1q25.3	10092		hsa04666:Fc gamma R-mediated phagocytosis,hsa04810:Regulation of actin cytoskeleton,hsa05130:Pathogenic Escherichia coli infection,
35899_at	Artn	artemin	1p33-p32	9048
39410_at	Asap2	ArfGAP with SH3 domain, ankyrin repeat and PH domain 2	2p25 2p25|2p24	8853	Genome-wide association analysis of susceptibility and clinical phenotype in multiple sclerosis,	hsa04144:Endocytosis,hsa04666:Fc gamma R-mediated phagocytosis,
36671_at	asnS	asparagine synthetase	7q21.3	440		hsa00250:Alanine, aspartate and glutamate metabolism,hsa00910:Nitrogen metabolism,
37528_at	asph	aspartate beta-hydroxylase	8q12.1	444
34396_at	Asxl1	additional sex combs like 1 (Drosophila)	20q11.1	171023
37575_at, 1994_at	Atf2	activating transcription factor 2	2q32	1386		hsa04010:MAPK signaling pathway,
32720_at	Atg12	ATG12 autophagy related 12 homolog (S. cerevisiae)	5q21-q22	9140		hsa04140:Regulation of autophagy,hsa04622:RIG-I-like receptor signaling pathway,
38811_at	ATIC	5-aminoimidazole-4-carboxamide ribonucleotide formyltransferase/IMP cyclohydrolase	2q35	471	AICA-ribosiduria due to ATIC deficiency,	hsa00230:Purine metabolism,hsa00670:One carbon pool by folate,
32563_at	Atp1b3	ATPase, Na+/K+ transporting, beta 3 polypeptide	3q23	483		hsa04260:Cardiac muscle contraction,hsa04960:Aldosterone-regulated sodium reabsorption,
39790_at	ATP2A2	ATPase, Ca++ transporting, cardiac muscle, slow twitch 2	12q23-q24.1	488	A Genome-Wide Association Study Identifies Protein Quantitative Trait Loci (pQTLs),Acrokeratosis verruciformis,Darier disease,	hsa04020:Calcium signaling pathway,hsa04260:Cardiac muscle contraction,hsa05010:Alzheimer's disease,hsa05410:Hypertrophic cardiomyopathy (HCM),hsa05412:Arrhythmogenic right ventricular cardiomyopathy (ARVC),hsa05414:Dilated cardiomyopathy,
40096_at	Atp5a1	ATP synthase, H+ transporting, mitochondrial F1 complex, alpha subunit 1, cardiac muscle	18q12-q21	498		hsa00190:Oxidative phosphorylation,hsa05010:Alzheimer's disease,hsa05012:Parkinson's disease,hsa05016:Huntington's disease,
40115_at	Atp5c1	ATP synthase, H+ transporting, mitochondrial F1 complex, gamma polypeptide 1	10p15.1	509		hsa00190:Oxidative phosphorylation,hsa05010:Alzheimer's disease,hsa05012:Parkinson's disease,hsa05016:Huntington's disease,
38076_at	ATP5G1	ATP synthase, H+ transporting, mitochondrial F0 complex, subunit C1 (subunit 9)	17q21.32	516		hsa00190:Oxidative phosphorylation,hsa05010:Alzheimer's disease,hsa05012:Parkinson's disease,hsa05016:Huntington's disease,
34811_at	ATP5G3	ATP synthase, H+ transporting, mitochondrial F0 complex, subunit C3 (subunit 9)	2q31.1	518		hsa00190:Oxidative phosphorylation,hsa05010:Alzheimer's disease,hsa05012:Parkinson's disease,hsa05016:Huntington's disease,
38751_i_at	Atp5i	ATP synthase, H+ transporting, mitochondrial F0 complex, subunit E	4p16.3	521		hsa00190:Oxidative phosphorylation,
40134_at	ATP5J2	ATP synthase, H+ transporting, mitochondrial F0 complex, subunit F2	7q22.1	9551		hsa00190:Oxidative phosphorylation,
38693_at	atp5l	ATP synthase, H+ transporting, mitochondrial F0 complex, subunit G	11q23.3	10632		hsa00190:Oxidative phosphorylation,
37029_at	atp5o	ATP synthase, H+ transporting, mitochondrial F1 complex, O subunit	21q22.1-q22.2 21q22.1-q22.2|21q22.11	539		hsa00190:Oxidative phosphorylation,hsa05010:Alzheimer's disease,hsa05012:Parkinson's disease,hsa05016:Huntington's disease,
37229_at	ATR LOC648152 LOC651921	ataxia telangiectasia and Rad3 related; similar to ataxia telangiectasia and Rad3 related protein	3 3q22-q24	545 648152 651921	Seckel syndrome 1,	hsa04110:Cell cycle,hsa04115:p53 signaling pathway,
39686_g_at, 39685_at	atxn10	ataxin 10	22q13.31	25814	Spinocerebellar ataxia-10,
34852_g_at	AURKA AURKAPS1	aurora kinase A; aurora kinase A pseudogene 1	1q41 20q13.2-q13.3	6790 6791	Colon cancer, susceptibility to,	hsa04114:Oocyte meiosis,
33266_at	AURKB	aurora kinase B	17p13.1	9212
1278_at, 38433_at	AXL	AXL receptor tyrosine kinase	19q13.1	558
33368_at	AZIN1	antizyme inhibitor 1	8q22.3	51582
34644_at, 428_s_at, 201_s_at	B2M	beta-2-microglobulin	15q21-q22.2	567	Hypoproteinemia, hypercatabolic,	hsa04612:Antigen processing and presentation,
34177_at	b4galt2	UDP-Gal:betaGlcNAc beta 1,4- galactosyltransferase, polypeptide 2	1p34-p33	8704		hsa00052:Galactose metabolism,hsa00510:N-Glycan biosynthesis,hsa00533:Keratan sulfate biosynthesis,hsa00601:Glycosphingolipid biosynthesis,
38663_at	BANF1 LOC645870	similar to barrier-to-autointegration factor; barrier to autointegration factor 1	11q13.1 2q37.1	645870 8815
1801_at	BARD1	BRCA1 associated RING domain 1	2q34-q35	580	Breast cancer, susceptibility to,
32607_at	Basp1	brain abundant, membrane attached signal protein 1	5p15.1-p14	10409
35292_at	BAT1	HLA-B associated transcript 1	6p21.3	7919	Genomewide Association Study of an AIDS-Nonprogression Cohort Emphasizes the Role Played by HLA Genes (ANRS Genomewide Association Study 02).,	hsa03040:Spliceosome,
1997_s_at, 2065_s_at	BAX	BCL2-associated X protein	19q13.3-q13.4	581	Colorectal cancer,T-cell acute lymphoblastic leukemia,	hsa04115:p53 signaling pathway,hsa04210:Apoptosis,hsa04722:Neurotrophin signaling pathway,hsa05014:Amyotrophic lateral sclerosis (ALS),hsa05016:Huntington's disease,hsa05020:Prion diseases,hsa05200:Pathways in cancer,hsa05210:Colorectal cancer,
37971_at	BAZ1A	bromodomain adjacent to zinc finger domain, 1A	14q12-q13	11177
31867_at	Bbx	bobby sox homolog (Drosophila)	3q13.1	56987
38552_f_at	BCAP29	B-cell receptor-associated protein 29	7q22-q31	55973
41724_at	BCAP31	B-cell receptor-associated protein 31	Xq28	10134
36812_at	bcar3	breast cancer anti-estrogen resistance 3	1p22.1	8412
41111_at	BCAT2	branched chain aminotransferase 2, mitochondrial	19q13	587		hsa00280:Valine, leucine and isoleucine degradation,hsa00290:Valine, leucine and isoleucine biosynthesis,hsa00770:Pantothenate and CoA biosynthesis,
41682_s_at	BCKDHB	branched chain keto acid dehydrogenase E1, beta polypeptide	6q13-q15	594	Maple syrup urine disease, type Ib,	hsa00280:Valine, leucine and isoleucine degradation,
38050_at	BCLAF1 LOC731605	similar to Bcl-2-associated transcription factor 1 (Btf); BCL2-associated transcription factor 1	6q22-q23	731605 9774
31842_at	BCS1L	BCS1-like (yeast)	2q33	617	Bjornstad syndrome,Bjornstad syndrome (pili torti and deafness),GRACILE syndrome,Leigh syndrome,Mitochondrial complex III deficiency,
33434_at	Bet1 LOC100128542	hypothetical protein LOC100128542; blocked early in transport 1 homolog (S. cerevisiae)	7q21.1-q22 7q36.1	100128542 10282		hsa04130:SNARE interactions in vesicular transport,
35266_at, 35267_g_at	BLCAP	bladder cancer associated protein	20q11.2-q12	10904
32618_at	BLVRA	biliverdin reductase A	7p14-cen	644		hsa00860:Porphyrin and chlorophyll metabolism,
41562_at	BMI1	BMI1 polycomb ring finger oncogene	10p11.23	648
38709_at	bms1 LOC642311 LOC653557 LOC728611	BMS1 homolog, ribosome assembly protein (yeast) pseudogene; BMS1 homolog, ribosome assembly protein (yeast)	10q11.21 15q11.2 16p11.2 9q12	642311 653557 728611 9790
35615_at	BOP1	block of proliferation 1	8q24.3	23246
33759_at	BPGM	2,3-bisphosphoglycerate mutase	7q31-q34	669	Hemolytic anemia due to bisphosphoglycerate mutase deficiency,	hsa00010:Glycolysis / Gluconeogenesis,
604_at	BRCA1	breast cancer 1, early onset	17q21	672	Breast cancer-1,Breast-ovarian cancer,Breast-ovarian cancer, familial, 1,Ovarian cancer,Papillary serous carcinoma of the peritoneum,	hsa04120:Ubiquitin mediated proteolysis,
37000_at	BRP44	brain protein 44	1q24	25874
36162_at	bsg	basigin (Ok blood group)	19p13.3	682	Blood group, OK,
37755_at	Btbd3	BTB (POZ) domain containing 3	20p12.2	22903
35055_at	btf3 BTF3L1	basic transcription factor 3; basic transcription factor 3, like 1 pseudogene	13q22 5q13.2	689 690	Multiple Genetic Loci for Bone Mineral Density and Fractures,
37218_at	BTG3	BTG family, member 3	21q21.1-q21.2	10950
41081_at	BUB1	budding uninhibited by benzimidazoles 1 homolog (yeast)	2q14	699	Colorectal cancer with chromosomal instability,	hsa04110:Cell cycle,hsa04114:Oocyte meiosis,hsa04914:Progesterone-mediated oocyte maturation,
35699_at	BUB1B	budding uninhibited by benzimidazoles 1 homolog beta (yeast)	15q15	701	Colorectal cancer,Mosaic variegated aneuploidy syndrome,Premature chromatid separation trait,	hsa04110:Cell cycle,
41547_at, 34783_s_at	Bub3	budding uninhibited by benzimidazoles 3 homolog (yeast)	10q26	9184		hsa04110:Cell cycle,
39773_at	c14orf1	chromosome 14 open reading frame 1	14q24.3	11161
38011_at	C19orf2	chromosome 19 open reading frame 2	19q12	8725
35444_at	C19orf21	chromosome 19 open reading frame 21	19p13.3	126353
39811_at	c19orf50	chromosome 19 open reading frame 50	19p13.11	79036
39782_at	C1D C1DP2 C1DP3	C1D nuclear receptor co-repressor; similar to nuclear DNA-binding protein; similar to hCG1791993	10q22.3 2p13-p12	10438 642521 642538		hsa03018:RNA degradation,
37668_at	c1qbp	complement component 1, q subcomponent binding protein	17p13.3	708
33315_at	C2orf3	chromosome 2 open reading frame 3	2p11.2-p11.1	6936
39517_at	C5orf15	chromosome 5 open reading frame 15	5q31.1	56951	Conduct disorder and ADHD: Evaluation of conduct problems as a categorical and quantitative trait in the international multicentre ADHD genetics study,
33466_at	c5orf30	chromosome 5 open reading frame 30	5q21.1	90355
33297_at	C6orf130	chromosome 6 open reading frame 130	6p21.1	221443
34246_at	C6orf145	chromosome 6 open reading frame 145	6p25.2	221749
41809_at	c7orf23	chromosome 7 open reading frame 23	7q21.1-q21.2	79161
40132_g_at	C7orf28A C7orf28B LOC100133775	chromosome 7 open reading frame 28A; similar to Chromosome 7 open reading frame 28B; chromosome 7 open reading frame 28B	7p22.1	100133775 221960 51622
37610_at	C7orf44	chromosome 7 open reading frame 44	7p13	55744
749_at	cad	carbamoyl-phosphate synthetase 2, aspartate transcarbamylase, and dihydroorotase	2p22-p21	790		hsa00240:Pyrimidine metabolism,hsa00250:Alanine, aspartate and glutamate metabolism,
41739_s_at, 41738_at	CALD1	caldesmon 1	7q33	800		hsa04270:Vascular smooth muscle contraction,
911_s_at, 33458_r_at	CALM1 CALM2 CALM3	calmodulin 3 (phosphorylase kinase, delta); calmodulin 2 (phosphorylase kinase, delta); calmodulin 1 (phosphorylase kinase, delta)	14q24-q31 19q13.2-q13.3 2p21	801 805 808		hsa04020:Calcium signaling pathway,hsa04070:Phosphatidylinositol signaling system,hsa04114:Oocyte meiosis,hsa04270:Vascular smooth muscle contraction,hsa04720:Long-term potentiation,hsa04722:Neurotrophin signaling pathway,hsa04740:Olfactory transduction,hsa04910:Insulin signaling pathway,hsa04912:GnRH signaling pathway,hsa04916:Melanogenesis,hsa05010:Alzheimer's disease,hsa05214:Glioma,
1752_at	CALR	calreticulin	19p13.3-p13.2	811		hsa04612:Antigen processing and presentation,
37345_at	CALU	calumenin	7q32.1	813
41421_at	Camta2	calmodulin binding transcription activator 2	17p13.2	23125
40125_at	Canx	calnexin	5q35	821		hsa04612:Antigen processing and presentation,
935_at	CAP1	CAP, adenylate cyclase-associated protein 1 (yeast)	1p34.2	10487
38391_at	capG	capping protein (actin filament), gelsolin-like	2p11.2	822
37001_at	CAPN2	calpain 2, (m/II) large subunit	1q41-q42	824		hsa04210:Apoptosis,hsa04510:Focal adhesion,hsa05010:Alzheimer's disease,
36138_at	capns1	calpain, small subunit 1	19q13.12	826
39471_at	Caprin1	cell cycle associated protein 1	11p13	4076
40910_at	CAPZA1	capping protein (actin filament) muscle Z-line, alpha 1	1p13.2	829
37012_at	CAPZB	capping protein (actin filament) muscle Z-line, beta	1p36.1	832
41816_at	CARD10	caspase recruitment domain family, member 10	22q13.1	29775
574_s_at	CASP1	caspase 1, apoptosis-related cysteine peptidase (interleukin 1, beta, convertase)	11q23	834		hsa04621:NOD-like receptor signaling pathway,hsa04623:Cytosolic DNA-sensing pathway,hsa05014:Amyotrophic lateral sclerosis (ALS),
36143_at	Casp3	caspase 3, apoptosis-related cysteine peptidase	4q34	836		hsa04010:MAPK signaling pathway,hsa04115:p53 signaling pathway,hsa04210:Apoptosis,hsa04650:Natural killer cell mediated cytotoxicity,hsa05010:Alzheimer's disease,hsa05012:Parkinson's disease,hsa05014:Amyotrophic lateral sclerosis (ALS),hsa05016:Huntington's disease,hsa05120:Epithelial cell signaling in Helicobacter pylori infection,hsa05200:Pathways in cancer,hsa05210:Colorectal cancer,hsa05416:V…
35662_at	CASP6	caspase 6, apoptosis-related cysteine peptidase	4q25	839		hsa04210:Apoptosis,
38281_at	casp7	caspase 7, apoptosis-related cysteine peptidase	10q25	840		hsa04210:Apoptosis,hsa05010:Alzheimer's disease,
41257_at	cast	calpastatin	5q15	831
36119_at	cav1	caveolin 1, caveolae protein, 22kDa	7q31.1	857	Lipodystrophy, congenital generalized, type 3,	hsa04510:Focal adhesion,hsa05416:Viral myocarditis,
339_at	CAV2	caveolin 2	7q31.1	858		hsa04510:Focal adhesion,
38773_at	Cbr1	carbonyl reductase 1	21q22.13	873		hsa00590:Arachidonic acid metabolism,
40349_at	cbr4	carbonyl reductase 4	4q32.3	84869
38474_at	Cbs	cystathionine-beta-synthase	21q22.3	875	Homocystinuria, B6-responsive and nonresponsive types,Thrombosis, hyperhomocysteinemic,	hsa00260:Glycine, serine and threonine metabolism,hsa00270:Cysteine and methionine metabolism,hsa00450:Selenoamino acid metabolism,
37304_at	CBX1	chromobox homolog 1 (HP1 beta homolog Drosophila )	17q21.32	10951
38084_at, 38085_at	CBX3 LOC644101	similar to chromobox homolog 3; chromobox homolog 3 (HP1 gamma homolog, Drosophila)	15q15.1 6q22.1 7p15.2	11335 644101
39715_at	CBX5	chromobox homolog 5 (HP1 alpha homolog, Drosophila)	12q13.13	23468
39561_at	cbx6	chromobox homolog 6	22q13.1	23466
40697_at, 1943_at	CCNA2	cyclin A2	4q25-q31	890		hsa04110:Cell cycle,hsa04914:Progesterone-mediated oocyte maturation,
1945_at, 34736_at	CCNB1	cyclin B1	5q12	891		hsa04110:Cell cycle,hsa04114:Oocyte meiosis,hsa04115:p53 signaling pathway,hsa04914:Progesterone-mediated oocyte maturation,
32263_at	CCNB2	cyclin B2	15q22.2	9133		hsa04110:Cell cycle,hsa04114:Oocyte meiosis,hsa04115:p53 signaling pathway,hsa04914:Progesterone-mediated oocyte maturation,
2020_at, 38418_at, 2017_s_at	CCND1	cyclin D1	11q13	595	Centrocytic lymphoma,Colorectal cancer, susceptibility to,Leukemia/lymphoma, chronic B-cell,Multiple myeloma,Parathyroid adenomatosis 1,von Hippel-Lindau disease, modification of,	hsa04110:Cell cycle,hsa04115:p53 signaling pathway,hsa04310:Wnt signaling pathway,hsa04510:Focal adhesion,hsa04630:Jak-STAT signaling pathway,hsa05200:Pathways in cancer,hsa05210:Colorectal cancer,hsa05212:Pancreatic cancer,hsa05213:Endometrial cancer,hsa05214:Glioma,hsa05215:Prostate cancer,hsa05216:Thyroid cancer,hsa05218:Melanoma,hsa05219:Bladder cancer,hsa05220:Chronic myeloid leukemia,hsa052…
36650_at, 1983_at	CCND2	cyclin D2	12p13	894		hsa04110:Cell cycle,hsa04115:p53 signaling pathway,hsa04310:Wnt signaling pathway,hsa04510:Focal adhesion,hsa04630:Jak-STAT signaling pathway,
1795_g_at, 1794_at	CCND3	cyclin D3	6p21	896		hsa04110:Cell cycle,hsa04115:p53 signaling pathway,hsa04310:Wnt signaling pathway,hsa04510:Focal adhesion,hsa04630:Jak-STAT signaling pathway,
1920_s_at	ccng1	cyclin G1	5q32-q34	900		hsa04115:p53 signaling pathway,
1913_at	CCNG2	cyclin G2	4q21.1	901		hsa04115:p53 signaling pathway,
35759_at	CCT2	chaperonin containing TCP1, subunit 2 (beta)	12q15	10576	Many sequence variants affecting diversity of adult human height,
40774_at	Cct3	chaperonin containing TCP1, subunit 3 (gamma)	1q23	7203
40417_at	cct5	chaperonin containing TCP1, subunit 5 (epsilon)	5p15.2	22948	Neuropathy, hereditary sensory, with spastic paraplegia,
38416_at	cct6a	chaperonin containing TCP1, subunit 6A (zeta 1)	7p11.2	908
38720_at	Cct7	chaperonin containing TCP1, subunit 7 (eta)	2p13.2	10574
39767_at	CCT8 CCT8P1	similar to chaperonin containing TCP1, subunit 8 (theta); chaperonin containing TCP1, subunit 8 (theta)	1q21.1 21q22.11	10694 644131
36644_at	cd151	CD151 molecule (Raph blood group)	11p15.5	977	Blood group, Raph,Nephropathy with pretibial epidermolysis bullosa and deafness,
34819_at	CD164	CD164 molecule, sialomucin	6q21	8763	Many sequence variants affecting diversity of adult human height,	hsa04142:Lysosome,
31472_s_at, 1126_s_at, 1125_s_at, 2036_s_at, 40493_at	CD44	CD44 molecule (Indian blood group)	11p13	960	Blood group, Indian system,	hsa04512:ECM-receptor interaction,hsa04640:Hematopoietic cell lineage,
38441_s_at	Cd46	CD46 molecule, complement regulatory protein	1q32	4179	Hemolytic-uremic syndrome,Measles, susceptibility to,	hsa04610:Complement and coagulation cascades,
37890_at	CD47	CD47 molecule	3q13.1-q13.2	961		hsa04512:ECM-receptor interaction,
39389_at	CD9	CD9 molecule	12p13.3	928		hsa04640:Hematopoietic cell lineage,
41138_at	CD99	CD99 molecule	Xp22.32; Yp11.3	4267		hsa04514:Cell adhesion molecules (CAMs),hsa04670:Leukocyte transendothelial migration,
38123_at	Cdc123	cell division cycle 123 homolog (S. cerevisiae)	10p13	8872	Meta-analysis of genome-wide association data and large-scale replication identifies additional susceptibility loci for type 2 diabetes,
40404_s_at	CDC16	cell division cycle 16 homolog (S. cerevisiae)	13q34	8881		hsa04110:Cell cycle,hsa04114:Oocyte meiosis,hsa04120:Ubiquitin mediated proteolysis,hsa04914:Progesterone-mediated oocyte maturation,
38414_at	cdc20	cell division cycle 20 homolog (S. cerevisiae)	1p34.1	991		hsa04110:Cell cycle,hsa04114:Oocyte meiosis,hsa04120:Ubiquitin mediated proteolysis,
1347_at	Cdc25b	cell division cycle 25 homolog B (S. pombe)	20p13	994		hsa04010:MAPK signaling pathway,hsa04110:Cell cycle,hsa04914:Progesterone-mediated oocyte maturation,
40591_at	cdc27	cell division cycle 27 homolog (S. cerevisiae)	17q12-q23.2	996		hsa04110:Cell cycle,hsa04114:Oocyte meiosis,hsa04120:Ubiquitin mediated proteolysis,hsa04914:Progesterone-mediated oocyte maturation,
1536_at	cdc6	cell division cycle 6 homolog (S. cerevisiae)	17q21.3	990		hsa04110:Cell cycle,
482_at, 2073_s_at, 483_g_at	CDH13	cadherin 13, H-cadherin (heart)	16q24.2-q24.3	1012	Framingham Heart Study 100K Project: genome-wide associations for blood pressure and arterial stiffness,
160031_at	CDH3	cadherin 3, type 1, P-cadherin (placental)	16q22.1	1001	Ectodermal dysplasia, ectrodactyly, and macular dystrophy,Hypotrichosis, congenital, with juvenile macular dystrophy,Hypotrichosis, congential, with juvenile macular dystrophy,	hsa04514:Cell adhesion molecules (CAMs),
33324_s_at, 40915_r_at, 1803_at	Cdk1	cell division cycle 2, G1 to S and G2 to M	10q21.1	983		hsa04110:Cell cycle,hsa04114:Oocyte meiosis,hsa04115:p53 signaling pathway,hsa04540:Gap junction,hsa04914:Progesterone-mediated oocyte maturation,
36502_at	cdk14	PFTAIRE protein kinase 1	7q21-q22	5218
41535_at	Cdk2ap1	cyclin-dependent kinase 2 associated protein 1	12q24.31	8099
35151_at	CDK2AP2	cyclin-dependent kinase 2 associated protein 2	11q13	10263
1942_s_at	Cdk4	cyclin-dependent kinase 4	12q14	1019	Melanoma,	hsa04110:Cell cycle,hsa04115:p53 signaling pathway,hsa04530:Tight junction,hsa04660:T cell receptor signaling pathway,hsa05200:Pathways in cancer,hsa05212:Pancreatic cancer,hsa05214:Glioma,hsa05218:Melanoma,hsa05219:Bladder cancer,hsa05220:Chronic myeloid leukemia,hsa05222:Small cell lung cancer,hsa05223:Non-small cell lung cancer,
1599_at	CDKN3	cyclin-dependent kinase inhibitor 3	14q22	1033
36190_at	CDR2	cerebellar degeneration-related protein 2, 62kDa	16p12.3	1039
41343_at	Cds2	CDP-diacylglycerol synthase (phosphatidate cytidylyltransferase) 2	20p13	8760		hsa00564:Glycerophospholipid metabolism,hsa04070:Phosphatidylinositol signaling system,
32194_at, 229_at	Cebpz	CCAAT/enhancer binding protein (C/EBP), zeta	2p22.2	10153
34683_at, 33207_at	Celf1	CUG triplet repeat, RNA binding protein 1	11p11	10658
527_at	CENPA	centromere protein A	2p24-p21	1058
37302_at	CENPF	centromere protein F, 350/400ka (mitosin)	1q32-q41	1063
33893_r_at	CEP170	centrosomal protein 170kDa	1q44	9859
35232_f_at	CETN3	centrin, EF-hand protein, 3 (CDC31 homolog, yeast)	5q14.3	1070
33659_at	CFL1	cofilin 1 (non-muscle)	11q13	1072		hsa04360:Axon guidance,hsa04666:Fc gamma R-mediated phagocytosis,hsa04810:Regulation of actin cytoskeleton,
36514_at, 449_at	cgrrf1	cell growth regulator with ring finger domain 1	14q22.2	10668
41447_at	CHSY1	chondroitin sulfate synthase 1	15q26.3	22856		hsa00532:Chondroitin sulfate biosynthesis,
1020_s_at	CIB1	calcium and integrin binding 1 (calmyrin)	15q25.3-q26	10519
37293_at	ckap5	cytoskeleton associated protein 5	11p11.2	9793
31887_at	CKMT1A CKMT1B	creatine kinase, mitochondrial 1A; creatine kinase, mitochondrial 1B	15q15	1159 548596		hsa00330:Arginine and proline metabolism,
37347_at	cks1b	CDC28 protein kinase regulatory subunit 1B	1q21.2	1163		hsa05200:Pathways in cancer,hsa05222:Small cell lung cancer,
40690_at	CKS2	CDC28 protein kinase regulatory subunit 2	9q22	1164
36131_at	CLIC1	chloride intracellular channel 1	6p22.1-p21.2	1192
33891_at	CLIC4	chloride intracellular channel 4	1p36.11	25932
34324_at	Cln5	ceroid-lipofuscinosis, neuronal 5	13q21.1-q32	1203	Ceroid-lipofuscinosis, neuronal-5, variant late infantile,	hsa04142:Lysosome,
38732_at	CLNS1A	chloride channel, nucleotide-sensitive, 1A	11q13.5-q14	1207
41498_at	CLSTN1	calsyntenin 1	1p36.22	22883
32803_at	CNIH	cornichon homolog (Drosophila)	14q22.2	10175
40953_at	cnn3	calponin 3, acidic	1p22-p21	1266
37955_at	Cnpy2	canopy 2 homolog (zebrafish)	12q15	10330
31810_g_at, 31809_at	Cntn1	contactin 1	12q11-q12	1272	A Genome-Wide Association Study Identifies Protein Quantitative Trait Loci (pQTLs),Myopathy, congenital, Compton-North,	hsa04514:Cell adhesion molecules (CAMs),
34737_at	COG5	component of oligomeric golgi complex 5	7q22-q31	10466
35168_f_at	Col16a1	collagen, type XVI, alpha 1	1p35-p34	1307
41618_at	Col17a1	collagen, type XVII, alpha 1	10q24.3	1308	Epidermolysis bullosa inversa, junctional,Epidermolysis bullosa, generalized atrophic benign,epidermolysis bullosa, junctional, localisata,Epidermolysis bullosa, junctional, non-Herlitz type,
39333_at	Col4a1	collagen, type IV, alpha 1	13q34	1282	Angiopathy, hereditary, with nephropathy, aneurysms, and muscle cramps,Brain small vessel disease with Axenfeld-Rieger anomaly,Brain small vessel disease with hemorrhage,Porencephaly,	hsa04510:Focal adhesion,hsa04512:ECM-receptor interaction,hsa05200:Pathways in cancer,hsa05222:Small cell lung cancer,
36659_at	col4a2	collagen, type IV, alpha 2	13q34	1284		hsa04510:Focal adhesion,hsa04512:ECM-receptor interaction,hsa05200:Pathways in cancer,hsa05222:Small cell lung cancer,
39939_at	Col4a6	collagen, type IV, alpha 6	Xq22	1288	Leiomyomatosis, diffuse, with Alport syndrome,	hsa04510:Focal adhesion,hsa04512:ECM-receptor interaction,hsa05200:Pathways in cancer,hsa05222:Small cell lung cancer,
32123_at	COL7A1	collagen, type VII, alpha 1	3p21.1	1294	EBD inversa,EBD, Bart type,EBD, localisata variant,Epidermolysis bullosa dystrophica, AD,Epidermolysis bullosa dystrophica, AR,Epidermolysis bullosa pruriginosa,Epidermolysis bullosa, pretibial,Toenail dystrophy, isolated,Transient bullous of the newborn,
37459_at	COL8A1	collagen, type VIII, alpha 1	3q12.3	1295
36455_at	Col9a3	collagen, type IX, alpha 3	20q13.3	1299	Epiphyseal dysplasia, multiple, 3,Epiphyseal dysplasia, multiple, with myopathy,Intervertebral disc disease, susceptibility to,
32198_at	COMMD4	COMM domain containing 4	15q24.2	54939
34651_at	COMT	catechol-O-methyltransferase	22q11.21-q11.23 22q11.21-q11.23|22q11.21	1312	Panic disorder, susceptibility to,Schizophrenia, susceptibility to,	hsa00140:Steroid hormone biosynthesis,hsa00350:Tyrosine metabolism,
1789_at	Cops5	COP9 constitutive photomorphogenic homolog subunit 5 (Arabidopsis)	8q13.2	10987
34404_at	COPS7A	COP9 constitutive photomorphogenic homolog subunit 7A (Arabidopsis)	12p13.31	50813
32539_at	Cops8	COP9 constitutive photomorphogenic homolog subunit 8 (Arabidopsis)	2q37.3	10920
39443_s_at	COX5B	cytochrome c oxidase subunit Vb	2cen-q13	1329		hsa00190:Oxidative phosphorylation,hsa04260:Cardiac muscle contraction,hsa05010:Alzheimer's disease,hsa05012:Parkinson's disease,hsa05016:Huntington's disease,
41206_r_at	Cox6a1	cytochrome c oxidase subunit VIa polypeptide 1	12q24.2 12q24.2|12q24.2	1337		hsa00190:Oxidative phosphorylation,hsa04260:Cardiac muscle contraction,hsa05010:Alzheimer's disease,hsa05012:Parkinson's disease,hsa05016:Huntington's disease,
41760_at	COX7A2	cytochrome c oxidase subunit VIIa polypeptide 2 (liver)	6q12	1347		hsa00190:Oxidative phosphorylation,hsa04260:Cardiac muscle contraction,hsa05010:Alzheimer's disease,hsa05012:Parkinson's disease,hsa05016:Huntington's disease,
34330_at	Cox7a2l	cytochrome c oxidase subunit VIIa polypeptide 2 like	2p21	9167		hsa00190:Oxidative phosphorylation,hsa04260:Cardiac muscle contraction,hsa05010:Alzheimer's disease,hsa05012:Parkinson's disease,hsa05016:Huntington's disease,
34876_at	cpd	carboxypeptidase D	17q11.2	1362
39706_at	CPNE3	copine III	8q21.3	8895
1211_s_at	CRADD	CASP2 and RIPK1 domain containing adaptor with death domain	12q21.33-q23.1	8738	Many sequence variants affecting diversity of adult human height,
37535_at	CREB1	cAMP responsive element binding protein 1	2q34	1385	Histiocytoma, angiomatoid fibrous, somatic,	hsa04612:Antigen processing and presentation,hsa04916:Melanogenesis,hsa05016:Huntington's disease,hsa05215:Prostate cancer,
40849_s_at	creb3	cAMP responsive element binding protein 3	9pter-p22.1	10488		hsa04916:Melanogenesis,hsa05016:Huntington's disease,hsa05215:Prostate cancer,
39438_at	CREBL2	cAMP responsive element binding protein-like 2	12p13	1389
40119_at	CRTAP	cartilage associated protein	3p22.3	10491	Osteogenesis imperfecta, type IIB,Osteogenesis imperfecta, type VII,
37902_at	cryz	crystallin, zeta (quinone reductase)	1p31-p22	1429
38804_at	CSE1L	CSE1 chromosome segregation 1-like (yeast)	20q13	1434
38004_at	cspg4	chondroitin sulfate proteoglycan 4	15q24.2	1464
38700_at	CSRP1	cysteine and glycine-rich protein 1	1q32	1465
41401_at	CSRP2	cysteine and glycine-rich protein 2	12q21.1	1466
40334_at	cstf2	cleavage stimulation factor, 3' pre-RNA, subunit 2, 64kDa	Xq22.1	1478
41308_at, 41309_g_at	Ctbp1	C-terminal binding protein 1	4p16	1487		hsa04310:Wnt signaling pathway,hsa04330:Notch signaling pathway,hsa05200:Pathways in cancer,hsa05220:Chronic myeloid leukemia,
40780_at	CTBP2	C-terminal binding protein 2	10q26.13	1488	Multiple loci identified in a genome-wide association study of prostate cancer,	hsa04310:Wnt signaling pathway,hsa04330:Notch signaling pathway,hsa05200:Pathways in cancer,hsa05220:Chronic myeloid leukemia,
40196_at	Ctdspl	CTD (carboxy-terminal domain, RNA polymerase II, polypeptide A) small phosphatase-like	3p21.3	10217	A genome-wide association study of breast and prostate cancer in the NHLBI's Framingham Heart Study,
36638_at	CTGF	connective tissue growth factor	6q23.1	1490
41156_g_at, 2085_s_at, 41153_f_at, 41155_at	Ctnna1	catenin (cadherin-associated protein), alpha 1, 102kDa	5q31	1495		hsa04520:Adherens junction,hsa04530:Tight junction,hsa04670:Leukocyte transendothelial migration,hsa05200:Pathways in cancer,hsa05213:Endometrial cancer,hsa05412:Arrhythmogenic right ventricular cardiomyopathy (ARVC),
35331_at	CTNNAL1	catenin (cadherin-associated protein), alpha-like 1	9q31.2	8727
40777_at	CTNNB1	catenin (cadherin-associated protein), beta 1, 88kDa	3p21	1499	Colorectal cancer,Hepatoblastoma,Hepatocellular carcinoma,Medulloblastoma,Ovarian cancer,Ovarian carcinoma, endometrioid type,Pilomatricoma,	hsa04310:Wnt signaling pathway,hsa04510:Focal adhesion,hsa04520:Adherens junction,hsa04530:Tight junction,hsa04670:Leukocyte transendothelial migration,hsa04916:Melanogenesis,hsa05130:Pathogenic Escherichia coli infection,hsa05200:Pathways in cancer,hsa05210:Colorectal cancer,hsa05213:Endometrial cancer,hsa05215:Prostate cancer,hsa05216:Thyroid cancer,hsa05217:Basal cell carcinoma,hsa05412:Arrhyt…
32441_at	CTPS	CTP synthase	1p34.1	1503		hsa00240:Pyrimidine metabolism,
408_at	CXCL1	chemokine (C-X-C motif) ligand 1 (melanoma growth stimulating activity, alpha)	4q21	2919		hsa04060:Cytokine-cytokine receptor interaction,hsa04062:Chemokine signaling pathway,hsa04621:NOD-like receptor signaling pathway,hsa05120:Epithelial cell signaling in Helicobacter pylori infection,
37187_at	CXCL2	chemokine (C-X-C motif) ligand 2	4q21	2920		hsa04060:Cytokine-cytokine receptor interaction,hsa04062:Chemokine signaling pathway,hsa04621:NOD-like receptor signaling pathway,
34340_at, 34339_at	CYB5B	cytochrome b5 type B (outer mitochondrial membrane)	16q22.1	80777
36668_at	cyb5r3	cytochrome b5 reductase 3	22q13.31-qter 22q13.31-qter|22q13.2-q13.31	1727	Methemoglobinemia, type I,Methemoglobinemia, type II,	hsa00520:Amino sugar and nucleotide sugar metabolism,
35819_at	cyc1	cytochrome c-1	8q24.3	1537		hsa00190:Oxidative phosphorylation,hsa04260:Cardiac muscle contraction,hsa05010:Alzheimer's disease,hsa05012:Parkinson's disease,hsa05016:Huntington's disease,
35818_at	CYCS	cytochrome c, somatic	7p15.2	54205	Thrombocytopenia 4,	hsa04115:p53 signaling pathway,hsa04210:Apoptosis,hsa05010:Alzheimer's disease,hsa05012:Parkinson's disease,hsa05014:Amyotrophic lateral sclerosis (ALS),hsa05016:Huntington's disease,hsa05200:Pathways in cancer,hsa05210:Colorectal cancer,hsa05222:Small cell lung cancer,hsa05416:Viral myocarditis,
38909_at	CYP27B1	cytochrome P450, family 27, subfamily B, polypeptide 1	12q13.1-q13.3	1594	vitamin D-dependent rickets type I,Vitamin D-dependent rickets, type I,	hsa00100:Steroid biosynthesis,
38772_at	cyr61	cysteine-rich, angiogenic inducer, 61	1p31-p22	3491
38413_at	DAD1	defender against cell death 1	14q11-q12	1603	Temperature-sensitive apoptosis, cellular,	hsa00510:N-Glycan biosynthesis,
36199_at	DAP	death-associated protein	5p15.2	1611
32615_at	Dars	aspartyl-tRNA synthetase	2q21.3	1615		hsa00970:Aminoacyl-tRNA biosynthesis,
31865_at	Dbf4	DBF4 homolog (S. cerevisiae)	7q21.3	10926		hsa04110:Cell cycle,
37981_at	DBN1	drebrin 1	5q35.3	1627
40227_at	dcbld2	discoidin, CUB and LCCL domain containing 2	3q12.1 3q12.1|3	131566
886_at	DCK	deoxycytidine kinase	4q13.3-q21.1	1633		hsa00230:Purine metabolism,hsa00240:Pyrimidine metabolism,
631_g_at, 630_at	dctD	dCMP deaminase	4q35.1	1635		hsa00240:Pyrimidine metabolism,
36158_at	DCTN1	dynactin 1 (p150, glued homolog, Drosophila)	2p13	1639	Amyotrophic lateral sclerosis, susceptibility to,Neuropathy, distal hereditary motor, type VIIB,Perry syndrome,	hsa05016:Huntington's disease,
35039_at	dcun1d4	DCN1, defective in cullin neddylation 1, domain containing 4 (S. cerevisiae)	4q12	23142
1243_at	DDB2	damage-specific DNA binding protein 2, 48kDa	11p12-p11	1643	Xeroderma pigmentosum, group E, DDB-negative subtype,	hsa03420:Nucleotide excision repair,hsa04115:p53 signaling pathway,hsa04120:Ubiquitin mediated proteolysis,
35177_at	DDHD2	DDHD domain containing 2	8p12	23259
38791_at	DDOST	dolichyl-diphosphooligosaccharide-protein glycosyltransferase	1p36.1	1650		hsa00510:N-Glycan biosynthesis,
1007_s_at, 36643_at	DDR1	discoidin domain receptor tyrosine kinase 1	6p21.3	780
37663_at	DDX1	DEAD (Asp-Glu-Ala-Asp) box polypeptide 1	2p24	1653
831_at	ddx10	DEAD (Asp-Glu-Ala-Asp) box polypeptide 10	11q22-q23	1662
40490_at	DDX21	DEAD (Asp-Glu-Ala-Asp) box polypeptide 21	10q21	9188
38355_at	DDX3Y	DEAD (Asp-Glu-Ala-Asp) box polypeptide 3, Y-linked	Yq11	8653		hsa04622:RIG-I-like receptor signaling pathway,
38992_at	Dek	DEK oncogene	6p22.3	7913	Leukemia, acute nonlymphocytic,
33924_at	DENND5A	DENN/MADD domain containing 5A	11p15.4	23258
41872_at	Dfna5	deafness, autosomal dominant 5	7p15	1687	Deafness, autosomal dominant 5,
32716_at	dgkA	diacylglycerol kinase, alpha 80kDa	12q13.3	1606		hsa00561:Glycerolipid metabolism,hsa00564:Glycerophospholipid metabolism,hsa04070:Phosphatidylinositol signaling system,
38003_s_at	DGKZ	diacylglycerol kinase, zeta 104kDa	11p11.2	8525		hsa00561:Glycerolipid metabolism,hsa00564:Glycerophospholipid metabolism,hsa04070:Phosphatidylinositol signaling system,
1178_at	Dhfr	dihydrofolate reductase	5q11.2-q13.2	1719		hsa00670:One carbon pool by folate,hsa00790:Folate biosynthesis,
39814_s_at	DHRS7	dehydrogenase/reductase (SDR family) member 7	14q23.1	51635
35306_at	DHX15	DEAH (Asp-Glu-Ala-His) box polypeptide 15	4p15.3	1665		hsa03040:Spliceosome,
662_at, 36153_at	dhx9	DEAH (Asp-Glu-Ala-His) box polypeptide 9	1q25	1660
38764_at, 38765_at	DICER1	dicer 1, ribonuclease type III	14q32.13	23405
39883_at, 39884_g_at	Dimt1l	DIM1 dimethyladenosine transferase 1-like (S. cerevisiae)	5q11-q14	27292
34829_at	DKC1	dyskeratosis congenita 1, dyskerin	Xq28	1736	Dyskeratosis congenita-1,Hoyeraal-Hreidarsson syndrome,
35977_at	DKK1	dickkopf homolog 1 (Xenopus laevis)	10q11.2	22943		hsa04310:Wnt signaling pathway,
36163_at	dld	dihydrolipoamide dehydrogenase	7q31-q32	1738	Leigh syndrome,Maple syrup urine disease, type III,	hsa00010:Glycolysis / Gluconeogenesis,hsa00020:Citrate cycle (TCA cycle),hsa00260:Glycine, serine and threonine metabolism,hsa00280:Valine, leucine and isoleucine degradation,hsa00620:Pyruvate metabolism,
33791_at	DLEU1	deleted in lymphocytic leukemia 1 (non-protein coding)	13q14.3	10301
37231_at	DLGAP5	discs, large (Drosophila) homolog-associated protein 5	14q22.3	9787
33258_g_at	DLST DLSTP1	dihydrolipoamide S-succinyltransferase (E2 component of 2-oxo-glutarate complex); dihydrolipoamide S-succinyltransferase pseudogene (E2 component of 2-oxo-glutarate complex)	14q24.3 1p31	1743 1744		hsa00020:Citrate cycle (TCA cycle),hsa00310:Lysine degradation,
40488_at	dmd	dystrophin	Xp21.2	1756	Becker muscular dystrophy,Cardiomyopathy, dilated, 3B,Duchenne muscular dystrophy,	hsa05410:Hypertrophic cardiomyopathy (HCM),hsa05412:Arrhythmogenic right ventricular cardiomyopathy (ARVC),hsa05414:Dilated cardiomyopathy,hsa05416:Viral myocarditis,
41808_at	Dmtf1	cyclin D binding myb-like transcription factor 1	7q21	9988
37735_at	DNAJC25 DNAJC25-GNG10 GNG10	DnaJ (Hsp40) homolog, subfamily C , member 25; guanine nucleotide binding protein (G protein), gamma 10; DNAJC25-GNG10 readthrough transcript	9q31.3	2790 548645 552891		hsa04062:Chemokine signaling pathway,
41569_at	dnajc9	DnaJ (Hsp40) homolog, subfamily C, member 9	10q22.2	23234
37213_at, 37214_g_at	Dnase1l1	deoxyribonuclease I-like 1	Xq28	1774
357_at, 41201_at	DNM1L	dynamin 1-like	12p11.21	10059	Encephalopahty, lethal, due to defective mitochondrial peroxisomal fission,	hsa04144:Endocytosis,hsa04666:Fc gamma R-mediated phagocytosis,
37333_at	dnmt1	DNA (cytosine-5-)-methyltransferase 1	19p13.2	1786		hsa00270:Cysteine and methionine metabolism,
41620_at	DOCK4	dedicator of cytokinesis 4	7q31.1	9732
33938_g_at, 39021_at	DPY19L1 LOC100133317	dpy-19-like 1 (C. elegans); similar to hCG1645499	7p14.3	100133317 23333
40353_at	DPY19L4	dpy-19-like 4 (C. elegans)	8q22.1	286148
40607_at	Dpysl2	dihydropyrimidinase-like 2	8p22-p21	1808		hsa04360:Axon guidance,
36149_at	Dpysl3	dihydropyrimidinase-like 3	5q32	1809
35166_at	DSCR3	Down syndrome critical region gene 3	21q22.2	10311
33468_at	DSG2	desmoglein 2	18q12.1	1829	Arrhythmogenic right ventricular dysplasia, familial, 10,	hsa05412:Arrhythmogenic right ventricular cardiomyopathy (ARVC),
40304_at	DST	dystonin	6p12.1	667
1136_at	dtymk	deoxythymidylate kinase (thymidylate kinase); similar to Deoxythymidylate kinase (thymidylate kinase)	2 2q37.3	1841 727761		hsa00240:Pyrimidine metabolism,
1788_s_at	DUSP4	dual specificity phosphatase 4	8p12-p11	1846		hsa04010:MAPK signaling pathway,
41193_at	dusp6	dual specificity phosphatase 6	12q22-q23	1848		hsa04010:MAPK signaling pathway,
38368_at	dut	deoxyuridine triphosphatase	15q15-q21.1	1854	A Genome-Wide Association Study Identifies Protein Quantitative Trait Loci (pQTLs),	hsa00240:Pyrimidine metabolism,
35788_at, 35787_at	DYNC1I2 LOC728532	similar to dynein cytoplasmic 1 intermediate chain 2; dynein, cytoplasmic 1, intermediate chain 2	10q11.23 2q31.1	1781 728532
946_at	dynlt1	dynein, light chain, Tctex-type 1	6q25.2-q25.3	6993
36921_at	DYNLT3	dynein, light chain, Tctex-type 3	Xp21	6990
39931_at	dyrk3	dual-specificity tyrosine-(Y)-phosphorylation regulated kinase 3	1q32.1	8444
41632_at	E2F3	E2F transcription factor 3	6p22	1871		hsa04110:Cell cycle,hsa05200:Pathways in cancer,hsa05212:Pancreatic cancer,hsa05214:Glioma,hsa05215:Prostate cancer,hsa05218:Melanoma,hsa05219:Bladder cancer,hsa05220:Chronic myeloid leukemia,hsa05222:Small cell lung cancer,hsa05223:Non-small cell lung cancer,
38283_at	ebag9	estrogen receptor binding site associated, antigen, 9	8q23	9166
36135_at	EBNA1BP2	EBNA1 binding protein 2	1p35-p33	10969
32756_at	ech1	enoyl Coenzyme A hydratase 1, peroxisomal	19q13.1	1891
31853_at	eed	embryonic ectoderm development	11q14.2-q22.3	8726
35748_at	Eef1b2 LOC647030	eukaryotic translation elongation factor 1 beta 2; eukaryotic translation elongation factor 1 beta 2-like	2q33-q34 7q32.3	1933 647030
40587_s_at	EEF1E1	eukaryotic translation elongation factor 1 epsilon 1	6p24.3-p25.1	9521
32551_at	EFEMP1	EGF-containing fibulin-like extracellular matrix protein 1	2p16	2202	Doyne honeycomb degeneration of retina,Genome-wide association analysis identifies 20 loci that influence adult height,Many sequence variants affecting diversity of adult human height,
34335_at	EFNB2	ephrin-B2	13q33	1948		hsa04360:Axon guidance,
38472_at	EFR3A	EFR3 homolog A (S. cerevisiae)	8q24.22	23167
1537_at	egfr	epidermal growth factor receptor (erythroblastic leukemia viral (v-erb-b) oncogene homolog, avian)	7p12	1956	Adenocarcinoma of lung, response to tyrosine kinase inhibitor in,Nonsmall cell lung cancer, response to tyrosine kinase inhibitor in,Nonsmall cell lung cancer, susceptibility to,	hsa04010:MAPK signaling pathway,hsa04012:ErbB signaling pathway,hsa04020:Calcium signaling pathway,hsa04060:Cytokine-cytokine receptor interaction,hsa04144:Endocytosis,hsa04320:Dorso-ventral axis formation,hsa04510:Focal adhesion,hsa04520:Adherens junction,hsa04540:Gap junction,hsa04810:Regulation of actin cytoskeleton,hsa04912:GnRH signaling pathway,hsa05120:Epithelial cell signaling in Helicoba…
38097_at	EI24	etoposide induced 2.4 mRNA	11q24	9538		hsa04115:p53 signaling pathway,
36948_at	EID1	EP300 interacting inhibitor of differentiation 1	15q21.1-q21.2	23741
31665_s_at	Eif2a	eukaryotic translation initiation factor 2A, 65kDa	3q25.1	83939
38662_at	EIF2AK2	eukaryotic translation initiation factor 2-alpha kinase 2	2p22-p21	5610
35934_at, 1272_at	eif2s3	eukaryotic translation initiation factor 2, subunit 3 gamma, 52kDa	Xp22.2-p22.1	1968
34841_at	EIF3CL	eukaryotic translation initiation factor 3, subunit C-like	16p11.2	728689
35298_at	eif3d	eukaryotic translation initiation factor 3, subunit D	22q13.1	8664
38681_at	Eif3e	eukaryotic translation initiation factor 3, subunit E	8q22-q23	3646
35814_at	EIF3M	eukaryotic translation initiation factor 3, subunit M	11p13	10480
31845_at	Elf4	E74-like factor 4 (ets domain transcription factor)	Xq26	2000
33821_at	Elovl5	ELOVL family member 5, elongation of long chain fatty acids (FEN1/Elo2, SUR4/Elo3-like, yeast)	6p21.1-p12.1	60481		hsa01040:Biosynthesis of unsaturated fatty acids,
39357_at	EMG1	EMG1 nucleolar protein homolog (S. cerevisiae)	12p13	10436
41328_s_at	Eml2	echinoderm microtubule associated protein like 2	19q13.32	24139
37762_at	emp1	epithelial membrane protein 1	12p12.3	2012
39182_at	emp3	epithelial membrane protein 3	19q13.3	2014
2035_s_at	eno1	enolase 1, (alpha)	1p36.3-p36.2	2023	Enolase deficiency,	hsa00010:Glycolysis / Gluconeogenesis,hsa03018:RNA degradation,
39876_at	entpd6	ectonucleoside triphosphate diphosphohydrolase 6 (putative function)	20p11.2-p11.22	955		hsa00230:Purine metabolism,hsa00240:Pyrimidine metabolism,
32585_at	EPB41L2	erythrocyte membrane protein band 4.1-like 2	6q23	2037		hsa04530:Tight junction,
575_s_at	epcam	epithelial cell adhesion molecule	2p21	4072
35300_at	eprs	glutamyl-prolyl-tRNA synthetase	1q41-q42	2058		hsa00860:Porphyrin and chlorophyll metabolism,hsa00970:Aminoacyl-tRNA biosynthesis,
2063_at	ERCC5	excision repair cross-complementing rodent repair deficiency, complementation group 5	13q33	2073	Cerebrooculofacioskeletal syndrome,Cerebrooculofacioskeletal syndrome 3,Xeroderma pigmentosum, group G,	hsa03420:Nucleotide excision repair,
1242_at, 38996_at	erF	Ets2 repressor factor	19q13	2077
39079_at	ERH	enhancer of rudimentary homolog (Drosophila)	14q24.1	2079
36945_at	ERP29	endoplasmic reticulum protein 29	12q24.13	10961
38375_at	esd	esterase D/formylglutathione hydrolase	13q14.1-q14.2	2098
38424_at	Esyt1	family with sequence similarity 62 (C2 domain containing), member A	12q13.2	23344
40509_at	etfA	electron-transfer-flavoprotein, alpha polypeptide	15q23-q25	2108	Glutaricaciduria, type IIA,
36170_at	Ethe1	ethylmalonic encephalopathy 1	19q13.31	23474	Ethylmalonic encephalopathy,
34818_at	ETV5	ets variant 5	3q28	2119	Genome-wide association yields new sequence variants at seven loci that associate with measures of obesity,
33294_at	EXOSC7	exosome component 7	3p21.31	23016		hsa03018:RNA degradation,
36968_s_at	EXOSC8	exosome component 8	13q13.1	11340		hsa03018:RNA degradation,
222_at, 32164_at	ext1	exostoses (multiple) 1	8q24.11-q24.13	2131	Chondrosarcoma,Exostoses, multiple, type 1,trichorhinophalangeal syndrome, type II,	hsa00534:Heparan sulfate biosynthesis,
36593_at, 36594_s_at	EXT2	exostoses (multiple) 2	11p12-p11	2132	Exostoses, multiple, type 2,	hsa00534:Heparan sulfate biosynthesis,
36526_at	Extl2	exostoses (multiple)-like 2	1p21	2135		hsa00534:Heparan sulfate biosynthesis,
41700_at	F2R	coagulation factor II (thrombin) receptor	5q13	2149		hsa04020:Calcium signaling pathway,hsa04080:Neuroactive ligand-receptor interaction,hsa04144:Endocytosis,hsa04610:Complement and coagulation cascades,hsa04810:Regulation of actin cytoskeleton,
38247_at, 36345_g_at	f2rl1	coagulation factor II (thrombin) receptor-like 1	5q13	2150		hsa04080:Neuroactive ligand-receptor interaction,
36543_at	F3	coagulation factor III (thromboplastin, tissue factor)	1p22-p21	2152		hsa04610:Complement and coagulation cascades,
37907_at	f8a1 F8A2 F8A3	coagulation factor VIII-associated (intronic transcript) 2; coagulation factor VIII-associated (intronic transcript) 3; coagulation factor VIII-associated (intronic transcript) 1	Xq28	474383 474384 8263
38755_at	Fadd	Fas (TNFRSF6)-associated via death domain	11q13.3	8772		hsa04210:Apoptosis,hsa04620:Toll-like receptor signaling pathway,hsa04622:RIG-I-like receptor signaling pathway,hsa05010:Alzheimer's disease,hsa05200:Pathways in cancer,
41719_i_at, 41717_at, 39373_at, 39372_at, 41718_g_at	Fads1	fatty acid desaturase 1	11q12.2-q13.1	3992	Common variants at 30 loci contribute to polygenic dyslipidemia,Genetics Meets Metabolomics: A Genome-Wide Association Study of Metabolite Profiles in Human Serum,Genome-wide association analysis of metabolic traits in a birth cohort from a founder population,	hsa01040:Biosynthesis of unsaturated fatty acids,
32190_at	FADS2	fatty acid desaturase 2	11q12-q13.1	9415	Common variants at 30 loci contribute to polygenic dyslipidemia,Genome-wide association analysis of metabolic traits in a birth cohort from a founder population,Loci influencing lipid levels and coronary heart disease risk in 16 European population cohorts,	hsa00592:alpha-Linolenic acid metabolism,hsa01040:Biosynthesis of unsaturated fatty acids,hsa03320:PPAR signaling pathway,
38643_at	FAM114A1	family with sequence similarity 114, member A1	4p14	92689
38694_at	FAM115A FAM115B	family with sequence similarity 115, member A; family with sequence similarity 115, member B (pseudogene)	7q35	653199 9747
37031_at	FAM120A	family with sequence similarity 120A	9q22.31	23196
33856_at	FAM127A	family with sequence similarity 127, member A	Xq26	8933
41008_at	FAM169A	family with sequence similarity 169, member A	5q13.3	26049
34321_i_at	FAM3C	family with sequence similarity 3, member C	7q31	10447
33433_at	Fam98a	family with sequence similarity 98, member A	2p22.3	25940
39945_at	Fap	fibroblast activation protein, alpha	2q23	2191
1441_s_at	Fas	Fas (TNF receptor superfamily, member 6)	10q24.1	355	Autoimmune lymphoproliferative syndrome,Autoimmune lymphoproliferative syndrome, type IA,Squamous cell carcinoma, burn scar-related, somatic,	hsa04010:MAPK signaling pathway,hsa04060:Cytokine-cytokine receptor interaction,hsa04115:p53 signaling pathway,hsa04210:Apoptosis,hsa04650:Natural killer cell mediated cytotoxicity,hsa04940:Type I diabetes mellitus,hsa05010:Alzheimer's disease,hsa05200:Pathways in cancer,hsa05320:Autoimmune thyroid disease,hsa05330:Allograft rejection,hsa05332:Graft-versus-host disease,
38429_at	FASN	fatty acid synthase	17q25	2194		hsa00061:Fatty acid biosynthesis,hsa04910:Insulin signaling pathway,
40454_at	Fat1	FAT tumor suppressor homolog 1 (Drosophila)	4q35	2195
32843_s_at, 39173_at	FBL	fibrillarin	19q13.1	2091
35337_at	Fbxo7	F-box protein 7	22q12-q13	25793	Parkinson disease 15, autosomal recessive,Parkinsonian-pyramidal syndrome,
34848_at	FDFT1	farnesyl-diphosphate farnesyltransferase 1	8p23.1-p22	2222		hsa00100:Steroid biosynthesis,
1515_at, 1516_g_at, 41583_at	FEN1	flap structure-specific endonuclease 1	11q12	2237		hsa03030:DNA replication,hsa03410:Base excision repair,hsa03450:Non-homologous end-joining,
36577_at	Fermt2	fermitin family homolog 2 (Drosophila)	14q22.2	10979
37743_at	fez1	fasciculation and elongation protein zeta 1 (zygin I)	11q24.2	9638
38651_at	fez2	fasciculation and elongation protein zeta 2 (zygin II)	2p21	9637
38489_at	FGFBP1	fibroblast growth factor binding protein 1	4p16-p15	9982
32546_at	FH	fumarate hydratase	1q42.1	2271	Fumarase deficiency,Leiomyomatosis and renal cell cancer,Multiple cutaneous and uterine leiomyomata,	hsa00020:Citrate cycle (TCA cycle),hsa05200:Pathways in cancer,hsa05211:Renal cell carcinoma,
32542_at	fhl1	four and a half LIM domains 1	Xq26	2273	Myopathy, reducing body, X-linked, childhood-onset,Myopathy, reducing body, X-linked, severe early-onset,Myopathy, reducing body, X-linked, severe early-onset, 300717, Myopathy, reducing body, X-linked, ch,Myopathy, X-linked, with postural muscle atrophy,Scapuloperoneal myopathy, X-linked dominant,
38422_s_at	FHL2	four and a half LIM domains 2	2q12-q14	2274
37361_at	FIBP	fibroblast growth factor (acidic) intracellular binding protein	11q13.1	9158
880_at, 953_g_at	FKBP1A	FK506 binding protein 1A, 12kDa	20p13	2280
34721_at	FKBP5	FK506 binding protein 5	6p21.3-p21.2	2289	Major depressive disorder and accelerated response to antidepressant drug treatment,
33133_at	fliI	flightless I homolog (Drosophila)	17p11.2	2314
32749_s_at, 32750_r_at	FLNA	filamin A, alpha (actin binding protein 280)	Xq28	2316	Frontometaphyseal dysplasia,Heterotopia, periventricular,Heterotopia, periventricular nodular, with frontometaphyseal dysplasia,Heterotopia, periventricular, ED variant,Melnick-Needles syndrome,Otopalatodigital syndrome, type I,Otopalatodigital syndrome, type II,	hsa04010:MAPK signaling pathway,hsa04510:Focal adhesion,
38078_at	FLNB	filamin B, beta (actin binding protein 278)	3p14.3	2317	Atelosteogenesis, type III,Atelostogenesis, type I,Boomerang dysplasia,Larsen syndrome,Larsen syndrome, autosomal dominant,Larson syndrome,Spondylocarpotarsal synostosis syndrome,	hsa04010:MAPK signaling pathway,hsa04510:Focal adhesion,
34853_at	FLRT2	fibronectin leucine rich transmembrane protein 2	14q24-q32	23768
31720_s_at, 31719_at, 311_s_at	fn1	fibronectin 1	2q34	2335	Glomerulopathy with fibronectin deposits 2,Glomerulopathy, fibronectin,	hsa04510:Focal adhesion,hsa04512:ECM-receptor interaction,hsa04810:Regulation of actin cytoskeleton,hsa05200:Pathways in cancer,hsa05222:Small cell lung cancer,
34739_at	fnbp1l	formin binding protein 1-like	1p22.1	54874
38649_at	FNDC3A	fibronectin type III domain containing 3A	13q14.2	22862
821_s_at	FOLR1	folate receptor 1 (adult)	11q13.3-q14.1	2348	?Congenital anomalies, susceptibility to,
522_s_at	FOLR3	folate receptor 3 (gamma)	11q13	2352
33203_s_at	foxd1	forkhead box D1	5q12-q13	2297
34715_at	FOXM1	forkhead box M1	12p13	2305
38139_at	FPGT TNNI3K	TNNI3 interacting kinase; fucose-1-phosphate guanylyltransferase	1p31.1	51086 8790		hsa00051:Fructose and mannose metabolism,hsa00520:Amino sugar and nucleotide sugar metabolism,
39070_at	fscn1	fascin homolog 1, actin-bundling protein (Strongylocentrotus purpuratus)	7p22	6624
38356_at	Fst	follistatin	5q11.2	10468	Polycystic ovary syndrome,	hsa04350:TGF-beta signaling pathway,
33900_at	FSTL3	follistatin-like 3 (secreted glycoprotein)	19p13	10272
33943_at	FTH1 FTHL16 FTHL20 FTHL3	ferritin, heavy polypeptide 1; ferritin, heavy polypeptide-like 16; similar to ferritin, heavy polypeptide 1; ferritin, heavy polypeptide-like 3 pseudogene	11q13 2p23.3 2q31.3	2495 2498 2508 729009	Iron overload, autosomal dominant,	hsa00860:Porphyrin and chlorophyll metabolism,
35083_at	FTL FTLP2	similar to ferritin, light polypeptide; ferritin, light polypeptide	19q13.3 19q13.3-q13.4|19q13.3 Xp21.2	2512 392437	Basal ganglia disease, adult-onset,Hyperferritinemia-cataract syndrome,
37242_at	FTO	fat mass and obesity associated	16q12.2	79068	A common variant in the FTO gene is associated with body mass index and predisposes to childhood and adult obesity,Adiposity-related heterogeneity in patterns of type 2 diabetes susceptibility observed in genome wide association data,Common variants near MC4R are associated with fat mass, weight and risk of obesity,Genome Wide Association (GWA) Study for Early Onset Extreme Obesity Supports the R…
33437_at	ftsj1	FtsJ homolog 1 (E. coli)	Xp11.23	24140	Mental retardation, X-linked-44,Mental retardation, X-linked-9,
39860_at	FUBP1	far upstream element (FUSE) binding protein 1	1p31.1	8880
38405_at	FXR1	fragile X mental retardation, autosomal homolog 1	3q28	8087
34472_at	FZD6	frizzled homolog 6 (Drosophila)	8q22.3-q23.1	8323		hsa04310:Wnt signaling pathway,hsa04916:Melanogenesis,hsa05200:Pathways in cancer,hsa05210:Colorectal cancer,hsa05217:Basal cell carcinoma,
38326_at	G0s2	G0/G1switch 2	1q32.2	50486
41133_at	G3BP1	GTPase activating protein (SH3 domain) binding protein 1	5q33.1	10146
35793_at	G3BP2	GTPase activating protein (SH3 domain) binding protein 2	4q21.1	9908
33936_at	GALC	galactosylceramidase	14q31	2581	Krabbe disease,	hsa00600:Sphingolipid metabolism,hsa04142:Lysosome,
31598_s_at	galE	UDP-galactose-4-epimerase	1p36-p35	2582	Galactose epimerase deficiency,	hsa00052:Galactose metabolism,hsa00520:Amino sugar and nucleotide sugar metabolism,
37825_at	Galk2	galactokinase 2	15q21.1	2585		hsa00052:Galactose metabolism,hsa00520:Amino sugar and nucleotide sugar metabolism,
37040_at	GANAB	glucosidase, alpha; neutral AB	11q12.3	23193		hsa00510:N-Glycan biosynthesis,
AFFX-HUMGAPDH/M33197_M_at, 35905_s_at, AFFX-HUMGAPDH/M33197_5_at, AFFX-HUMGAPDH/M33197_3_at	GAPDH GAPDHL6 LOC100133042	glyceraldehyde-3-phosphate dehydrogenase-like 6; hypothetical protein LOC100133042; glyceraldehyde-3-phosphate dehydrogenase	12p13 12p13.31 15q22.31	100133042 2597 729403		hsa00010:Glycolysis / Gluconeogenesis,hsa05010:Alzheimer's disease,
38384_at	GART	phosphoribosylglycinamide formyltransferase, phosphoribosylglycinamide synthetase, phosphoribosylaminoimidazole synthetase	21q22.1 21q22.1|21q22.11	2618		hsa00230:Purine metabolism,hsa00670:One carbon pool by folate,
31874_at	GAS2L1	growth arrest-specific 2 like 1	22q12.2	10634
1598_g_at, 37658_at, 1597_at	gas6 LOC732446	similar to growth arrest-specific 6; growth arrest-specific 6	13q34	2621 732446
39793_at	Gbas	glioblastoma amplified sequence	7p12	2631
37357_at	GCSH LOC654085 LOC729080 LOC730107	similar to Glycine cleavage system H protein, mitochondrial precursor; glycine cleavage system protein H (aminomethyl carrier); similar to Glycine cleavage system H protein, mitochondrial	16q23.2 19 1q24.2 5q31.3	2653 654085 729080 730107	Glycine encephalopathy,
777_at, 35307_at	GDI2	GDP dissociation inhibitor 2	10p15	2665
32626_at	GFPT1	glutamine-fructose-6-phosphate transaminase 1	2p13	2673		hsa00250:Alanine, aspartate and glutamate metabolism,hsa00520:Amino sugar and nucleotide sugar metabolism,
39677_at	Gins1	GINS complex subunit 1 (Psf1 homolog)	20p11.21	9837
38903_at	Gjb5	gap junction protein, beta 5, 31.1kDa	1p35.1	2709
37742_at	Glb1	galactosidase, beta 1	3p21.33	2720	GM1-gangliosidosis,GM1-gangliosidosis, type I,GM1-gangliosidosis, type II,GM1-gangliosidosis, type III,Morquio syndrome B,Mucopolysaccharidosis IVB,	hsa00052:Galactose metabolism,hsa00511:Other glycan degradation,hsa00531:Glycosaminoglycan degradation,hsa00600:Sphingolipid metabolism,hsa00604:Glycosphingolipid biosynthesis,hsa04142:Lysosome,
38667_at	GLOD4	glyoxalase domain containing 4	17p13.3	51031
33126_at	glt8d1	glycosyltransferase 8 domain containing 1	3p21.1	55830
31691_g_at	glud1	glutamate dehydrogenase 1	10p11.2 10q23.3	2746	Hyperinsulinism-hyperammonemia syndrome,	hsa00250:Alanine, aspartate and glutamate metabolism,hsa00330:Arginine and proline metabolism,hsa00471:D-Glutamine and D-glutamate metabolism,hsa00910:Nitrogen metabolism,
31690_at	GLUD2	glutamate dehydrogenase 2	Xq24-q25	2747		hsa00250:Alanine, aspartate and glutamate metabolism,hsa00330:Arginine and proline metabolism,hsa00471:D-Glutamine and D-glutamate metabolism,hsa00910:Nitrogen metabolism,
40522_at	GLUL	glutamate-ammonia ligase (glutamine synthetase)	1q31	2752	Glutamine deficiency, congenital,	hsa00250:Alanine, aspartate and glutamate metabolism,hsa00330:Arginine and proline metabolism,hsa00910:Nitrogen metabolism,
763_at	gmfb	glia maturation factor, beta	14q22.2	2764
36457_at	GMPS	guanine monphosphate synthetase	3q24	8833	Leukemia, acute myelogenous,	hsa00230:Purine metabolism,hsa00983:Drug metabolism,
41476_at	GNA11	guanine nucleotide binding protein (G protein), alpha 11 (Gq class)	14q12 19p13.3	2767		hsa04020:Calcium signaling pathway,hsa04270:Vascular smooth muscle contraction,hsa04540:Gap junction,hsa04730:Long-term depression,hsa04912:GnRH signaling pathway,
34106_at	Gna12	guanine nucleotide binding protein (G protein) alpha 12	7p22.2	2768	Many sequence variants affecting diversity of adult human height,	hsa04010:MAPK signaling pathway,hsa04270:Vascular smooth muscle contraction,hsa04730:Long-term depression,hsa04810:Regulation of actin cytoskeleton,
37307_at	gnai2	guanine nucleotide binding protein (G protein), alpha inhibiting activity polypeptide 2	3p21	2771	Pituitary ACTH-secreting adenoma,Ventricular tachycardia, idiopathic,	hsa04062:Chemokine signaling pathway,hsa04360:Axon guidance,hsa04530:Tight junction,hsa04540:Gap junction,hsa04670:Leukocyte transendothelial migration,hsa04730:Long-term depression,hsa04914:Progesterone-mediated oocyte maturation,hsa04916:Melanogenesis,
38581_at	GNAQ	guanine nucleotide binding protein (G protein), q polypeptide	9q21	2776	Bleeding diathesis due to GNAQ deficiency,	hsa04020:Calcium signaling pathway,hsa04270:Vascular smooth muscle contraction,hsa04540:Gap junction,hsa04720:Long-term potentiation,hsa04730:Long-term depression,hsa04912:GnRH signaling pathway,hsa04916:Melanogenesis,hsa05010:Alzheimer's disease,hsa05016:Huntington's disease,
33341_at	GNB1	guanine nucleotide binding protein (G protein), beta polypeptide 1	1p36.33	2782		hsa04062:Chemokine signaling pathway,hsa04742:Taste transduction,
38176_at	GNB5	guanine nucleotide binding protein (G protein), beta 5	15q21.2	10681		hsa04062:Chemokine signaling pathway,
35272_at	gng5	guanine nucleotide binding protein (G protein), gamma 5	1p22	2787		hsa04062:Chemokine signaling pathway,
39392_at	GNPAT	glyceronephosphate O-acyltransferase	1q42	8443	Chondrodysplasia punctata, rhizomelic, type 2,	hsa00564:Glycerophospholipid metabolism,
40764_at	Got2	glutamic-oxaloacetic transaminase 2, mitochondrial (aspartate aminotransferase 2)	16q21	2806		hsa00250:Alanine, aspartate and glutamate metabolism,hsa00270:Cysteine and methionine metabolism,hsa00330:Arginine and proline metabolism,hsa00350:Tyrosine metabolism,hsa00360:Phenylalanine metabolism,hsa00400:Phenylalanine, tyrosine and tryptophan biosynthesis,
33929_at	GPC1	glypican 1	2q35-q37	2817	A Genome-Wide Association Study of Schizophrenia Using Brain Activation as a Quantitative Phenotype,
39122_at	GPI	glucose phosphate isomerase	19q13.1	2821	Hemolytic anemia due to glucosephosphate isomerase deficiency,Hydrops fetalis, one form,	hsa00010:Glycolysis / Gluconeogenesis,hsa00030:Pentose phosphate pathway,hsa00500:Starch and sucrose metabolism,hsa00520:Amino sugar and nucleotide sugar metabolism,
41756_at	GPN1	GPN-loop GTPase 1	2p23.3	11321
33299_at	GPR125	G protein-coupled receptor 125	4p15.31	166647
36014_at	GPR126	G protein-coupled receptor 126	6q24.1	57211	Identification of ten loci associated with height highlights new biological pathways in human growth,Many sequence variants affecting diversity of adult human height,
1834_at	GPR176	G protein-coupled receptor 176	15q14-q15.1	11245
37033_s_at	GPX1	glutathione peroxidase 1	3p21.3	2876	Hemolytic anemia due to glutathione peroxidase deficiency,	hsa00480:Glutathione metabolism,hsa00590:Arachidonic acid metabolism,hsa05014:Amyotrophic lateral sclerosis (ALS),hsa05016:Huntington's disease,
36629_at	GRAMD4 TSC22D3	TSC22 domain family, member 3; GRAM domain containing 4	22q13.31 Xq22.3	1831 23151
40133_s_at	grhpr	glyoxylate reductase/hydroxypyruvate reductase	9q12	9380	Hyperoxaluria, primary, type II,	hsa00620:Pyruvate metabolism,hsa00630:Glyoxylate and dicarboxylate metabolism,
32595_at	Grsf1	G-rich RNA sequence binding factor 1	4q13	2926
824_at	GSTO1	glutathione S-transferase omega 1	10q25.1	9446		hsa00480:Glutathione metabolism,hsa00980:Metabolism of xenobiotics by cytochrome P450,hsa00982:Drug metabolism,
41371_at	GTF2H4	general transcription factor IIH, polypeptide 4, 52kDa	6p21.3	2968		hsa03022:Basal transcription factors,hsa03420:Nucleotide excision repair,
39162_at	GTF2H5	general transcription factor IIH, polypeptide 5	6q25.3	404672	Trichothiodystrophy, complementation group A,	hsa03420:Nucleotide excision repair,
36188_at	GTF3A	general transcription factor IIIA	13q12.3-q13.1	2971
39092_at, 39046_at	H2AFV	H2A histone family, member V	7p13	94239		hsa05322:Systemic lupus erythematosus,
39337_at	H2AFZ	H2A histone family, member Z	4q24	3015		hsa05322:Systemic lupus erythematosus,
38768_at	hadh	hydroxyacyl-Coenzyme A dehydrogenase	4q22-q26	3033	3-hydroxyacyl-CoA dehydrogenase deficiency,Hyperinsulinemic hypoglycemia, familial, 4,	hsa00062:Fatty acid elongation in mitochondria,hsa00071:Fatty acid metabolism,hsa00280:Valine, leucine and isoleucine degradation,hsa00310:Lysine degradation,hsa00380:Tryptophan metabolism,hsa00650:Butanoate metabolism,
41855_at	HAT1	histone acetyltransferase 1	2q31.2-q33.1	8520
37483_at	hdac9	histone deacetylase 9	7p21.1	9734
34359_at	hddc2	HD domain containing 2	6q13-q24.3	51020
33328_at	HEG1	HEG homolog 1 (zebrafish)	3q21.2	57493
35618_at	helz	helicase with zinc finger	17q24.2	9931
39733_at	HERPUD1	homocysteine-inducible, endoplasmic reticulum stress-inducible, ubiquitin-like domain member 1	16q12.2-q13	9709
39340_at	hexA	hexosaminidase A (alpha polypeptide)	15q23-q24	3073	GM2-gangliosidosis, several forms,Hex A pseudodeficiency,Tay-Sachs disease,	hsa00511:Other glycan degradation,hsa00520:Amino sugar and nucleotide sugar metabolism,hsa00531:Glycosaminoglycan degradation,hsa00603:Glycosphingolipid biosynthesis,hsa00604:Glycosphingolipid biosynthesis,hsa04142:Lysosome,
38913_at	HFE	hemochromatosis	6p21.3	3077	Alzheimer disease, susceptibility to,Hemochromatosis,Microvascular complications of diabetes 7,Porphyria cutanea tarda, susceptibility to,Porphyria variegata,Porphyria variegata, susceptibility to,Transferrin serum level QTL,Variants in TF and HFE explain approximately 40% of genetic variation in serum-transferrin levels,
34696_at	HIBCH	3-hydroxyisobutyryl-Coenzyme A hydrolase	2q32.2	26275	3-hydroxyisobutryl-CoA hydrolase deficiency,	hsa00280:Valine, leucine and isoleucine degradation,hsa00410:beta-Alanine metabolism,hsa00640:Propanoate metabolism,
1009_at	HINT1	histidine triad nucleotide binding protein 1	5q31.2	3094
32706_at	HIRA	HIR histone cell cycle regulation defective homolog A (S. cerevisiae)	22q11.2	7290
39969_at	Hist1h4a Hist1h4b Hist1h4c Hist1h4d HIST1H4E Hist1h4f Hist1h4h Hist1h4i Hist1h4j Hist1h4k hist1h4l HIST2H4A HIST2H4B Hist4h4	histone cluster 1, H4l; histone cluster 1, H4k; histone cluster 4, H4; histone cluster 1, H4h; histone cluster 1, H4j; histone cluster 1, H4i; histone cluster 1, H4d; histone cluster 1, H4c; histone cluster 1, H4f; histone cluster 1, H4e; histone cluster 1, H4b; histone cluster 1, H4a; histone cluster 2, H4a; histone cluster 2, H4b	12p12.3 1q21 6p21.3 6p21.33 6p22-p21.3	121504 554313 8294 8359 8360 8361 8362 8363 8364 8365 8366 8367 8368 8370		hsa05322:Systemic lupus erythematosus,
41237_at	HLA-A	major histocompatibility complex, class I, A	6p21.3	3105	Abacavir hypersensitivity, susceptibility to,Ankylosing spondylitis, susceptibility to, 1,Stevens-Johnson syndrome, susceptibility to,	hsa04144:Endocytosis,hsa04514:Cell adhesion molecules (CAMs),hsa04612:Antigen processing and presentation,hsa04650:Natural killer cell mediated cytotoxicity,hsa04940:Type I diabetes mellitus,hsa05320:Autoimmune thyroid disease,hsa05330:Allograft rejection,hsa05332:Graft-versus-host disease,hsa05416:Viral myocarditis,
37383_f_at	HLA-B HLA-C	major histocompatibility complex, class I, C; major histocompatibility complex, class I, B	6p21.3 6p21.33	3106 3107	A Genome-Wide Association Study Identifies Protein Quantitative Trait Loci (pQTLs),A genome-wide association study of psoriasis and psoriatic arthritis identifies new disease Loci,Abacavir hypersensitivity, susceptibility to,ankylosing spondylitis,Genome-wide association study targeting hIV1 viral setpoint.,Genomewide Association Study of an AIDS-Nonprogression Cohort Emphasizes the Role Played b…	hsa04144:Endocytosis,hsa04514:Cell adhesion molecules (CAMs),hsa04612:Antigen processing and presentation,hsa04650:Natural killer cell mediated cytotoxicity,hsa04940:Type I diabetes mellitus,hsa05320:Autoimmune thyroid disease,hsa05330:Allograft rejection,hsa05332:Graft-versus-host disease,hsa05416:Viral myocarditis,
37420_i_at	HLA-F	major histocompatibility complex, class I, F	6p21.3	3134		hsa04144:Endocytosis,hsa04514:Cell adhesion molecules (CAMs),hsa04612:Antigen processing and presentation,hsa04940:Type I diabetes mellitus,hsa05320:Autoimmune thyroid disease,hsa05330:Allograft rejection,hsa05332:Graft-versus-host disease,hsa05416:Viral myocarditis,
34327_at	hltf	helicase-like transcription factor	3q25.1-q26.1	6596
37649_at	HMBS	hydroxymethylbilane synthase	11q23.3	3145	Porphyria, acute intermittent,Porphyria, acute intermittent, nonerythroid variant,	hsa00860:Porphyrin and chlorophyll metabolism,
35200_at	HMGA2	high mobility group AT-hook 2	12q15	8091	A common variant of HMGA2 is associated with adult and childhood height in the general population,Genome-wide association analysis identifies 20 loci that influence adult height,Identification of ten loci associated with height highlights new biological pathways in human growth,Lipoma,Lipomatosis, multiple,Many sequence variants affecting diversity of adult human height,Salivary adenoma,Stature Q…
38065_at	HMGB2	high-mobility group box 2	4q31	3148
33714_at	HMGB3 LOC646993 LOC729595 LOC729952	similar to high mobility group box 3; high-mobility group box 3	1q23.3 5q35.3 9p13.3 Xq28	3149 646993 729595 729952
34517_at	HMGCS1	3-hydroxy-3-methylglutaryl-Coenzyme A synthase 1 (soluble)	5p14-p13	3157		hsa00072:Synthesis and degradation of ketone bodies,hsa00280:Valine, leucine and isoleucine degradation,hsa00650:Butanoate metabolism,hsa00900:Terpenoid backbone biosynthesis,
306_s_at	HMGN1	high-mobility group nucleosome binding domain 1	21q22.3 21q22.3|21q22.2	3150
41231_f_at	HMGN2 LOC648822 LOC729505 LOC729687	hypothetical LOC729505; similar to hCG2040565; high-mobility group nucleosomal binding domain 2; similar to high-mobility group nucleosomal binding domain 2	1p36.1 1q22 3p22.1 3q23	3151 648822 729505 729687
35737_at, 35738_at	HMGN4	high mobility group nucleosomal binding domain 4	6p21.3	10473
36863_at	HMMR	hyaluronan-mediated motility receptor (RHAMM)	5q33.2-qter	3161	Breast cancer, susceptibility to,	hsa04512:ECM-receptor interaction,
37334_at	HNRNPA0	heterogeneous nuclear ribonucleoprotein A0	5q31	10949
40211_at	HNRNPA1 HNRNPA1P2 HNRPA1L-2 HNRPA1L3 LOC644037 LOC645691 LOC728643	heterogeneous nuclear ribonucleoprotein A1-like 3; similar to heterogeneous nuclear ribonucleoprotein A1; heterogeneous nuclear ribonucleoprotein A1 pseudogene 2; heterogeneous nuclear ribonucleoprotein A1; heterogeneous nuclear ribonucleoprotein A1 pseudogene	10q11.22 12q13.1 18q12.1 19p13.2 2q33.1 5q14.1 6p21.32	100131609 3178 388275 644037 645691 664709 728643		hsa03040:Spliceosome,
36654_s_at	HNRNPA2B1	heterogeneous nuclear ribonucleoprotein A2/B1	7p15	3181
35916_s_at	Hnrnpa3	heterogeneous nuclear ribonucleoprotein A3	2q31.2	220988		hsa03040:Spliceosome,
38094_at	Hnrnpab	heterogeneous nuclear ribonucleoprotein A/B	5q35.3	3182
723_s_at, 32408_s_at, 33666_at	Hnrnpc	heterogeneous nuclear ribonucleoprotein C (C1/C2)	14q11.2	3183		hsa03040:Spliceosome,
33845_at	Hnrnph1	heterogeneous nuclear ribonucleoprotein H1 (H)	5q35.3	3187
39415_at	Hnrnpk LOC644063	heterogeneous nuclear ribonucleoprotein K; similar to heterogeneous nuclear ribonucleoprotein K	3q11.2 9q21.32-q21.33	3190 644063		hsa03040:Spliceosome,
37717_at	hnrnpm	heterogeneous nuclear ribonucleoprotein M	19p13.3-p13.2	4670		hsa03040:Spliceosome,
39792_at	HNRNPR	heterogeneous nuclear ribonucleoprotein R	1p36.12	10236
38654_at	Hnrnpu	heterogeneous nuclear ribonucleoprotein U (scaffold attachment factor A)	1q44	3192		hsa03040:Spliceosome,
40576_f_at	HNRPDL	heterogeneous nuclear ribonucleoprotein D-like	4q13-q21	9987
37809_at	HOXA9	homeobox A9	7p15-p14	3205
37640_at	HPRT1	hypoxanthine phosphoribosyltransferase 1	Xq26.1	3251	HPRT-related gout,Lesch-Nyhan syndrome,	hsa00230:Purine metabolism,hsa00983:Drug metabolism,
35701_at, 1590_s_at	hras	v-Ha-ras Harvey rat sarcoma viral oncogene homolog	11p15.5	3265	Bladder cancer, somatic,Costello syndrome,Thyroid carcinoma, follicular, somatic,	hsa04010:MAPK signaling pathway,hsa04012:ErbB signaling pathway,hsa04062:Chemokine signaling pathway,hsa04144:Endocytosis,hsa04360:Axon guidance,hsa04370:VEGF signaling pathway,hsa04510:Focal adhesion,hsa04530:Tight junction,hsa04540:Gap junction,hsa04650:Natural killer cell mediated cytotoxicity,hsa04660:T cell receptor signaling pathway,hsa04662:B cell receptor signaling pathway,hsa04664:Fc eps…
32173_at	Hrsp12	heat-responsive protein 12	8q22	10247
41556_s_at	Hs3st1	heparan sulfate (glucosamine) 3-O-sulfotransferase 1	4p16	9957		hsa00534:Heparan sulfate biosynthesis,
31906_at	hsbp1	heat shock factor binding protein 1	16q23.3	3281
34044_at	HSF2BP	heat shock transcription factor 2 binding protein	21q22.3	11077
32316_s_at	HSP90AA1 HSP90AA2	heat shock protein 90kDa alpha (cytosolic), class A member 2; heat shock protein 90kDa alpha (cytosolic), class A member 1	11p14.1 14q32.33	3320 3324		hsa04612:Antigen processing and presentation,hsa04621:NOD-like receptor signaling pathway,hsa04914:Progesterone-mediated oocyte maturation,hsa05200:Pathways in cancer,hsa05215:Prostate cancer,
1161_at, 33984_at	HSP90AB1	heat shock protein 90kDa alpha (cytosolic), class B member 1	6p12	3326		hsa04612:Antigen processing and presentation,hsa04621:NOD-like receptor signaling pathway,hsa04914:Progesterone-mediated oocyte maturation,hsa05200:Pathways in cancer,hsa05215:Prostate cancer,
442_at	Hsp90b1	heat shock protein 90kDa beta (Grp94), member 1	12q24.2-q24.3	7184		hsa04621:NOD-like receptor signaling pathway,hsa05200:Pathways in cancer,hsa05215:Prostate cancer,
38807_at	HSPA4	heat shock 70kDa protein 4	5q31.1-q31.2	3308		hsa04612:Antigen processing and presentation,
36614_at	HSPA5 LOC400750	hypothetical gene supported by AF216292; NM_005347; heat shock 70kDa protein 5 (glucose-regulated protein, 78kDa)	1p34.3 9q33-q34.1	3309 400750		hsa04612:Antigen processing and presentation,hsa05020:Prion diseases,
1180_g_at, 1179_at, 33820_g_at, 40637_at	HSPA8	heat shock 70kDa protein 8	11q24.1	3312		hsa03040:Spliceosome,hsa04010:MAPK signaling pathway,hsa04144:Endocytosis,hsa04612:Antigen processing and presentation,
36032_at	hspb11	heat shock protein family B (small), member 11	1p32.1-p33	51668
37720_at	HSPD1 HSPD1P1 HSPD1P4 HSPD1P5 HSPD1P6	heat shock 60kDa protein 1 (chaperonin) pseudogene 5; heat shock 60kDa protein 1 (chaperonin) pseudogene 6; heat shock 60kDa protein 1 (chaperonin) pseudogene 1; heat shock 60kDa protein 1 (chaperonin) pseudogene 4; heat shock 60kDa protein 1 (chaperonin)	12q13.2 2q33.1 3p22.2 4q31.22 5p14.3	3329 345041 643300 644745 645548	Leukodystrophy, hypomyelinating, 4,Leukodystrophy, hypomyelinating, autosomal recessive,Spastic paraplegia-13,	hsa03018:RNA degradation,hsa04940:Type I diabetes mellitus,
39353_at	HSPE1	heat shock 10kDa protein 1 (chaperonin 10)	2q33.1	3336
718_at, 719_g_at	HTRA1	HtrA serine peptidase 1	10q26.3	5654	HTRA1 promoter polymorphism in wet age-related macular degeneration,Macular degeneration, age-related, 7,Macular degeneration, age-related, neovascular type,
33863_at	hyou1	hypoxia up-regulated 1	11q23.1-q23.3	10525
40827_at	iars	isoleucyl-tRNA synthetase	9q21	3376		hsa00290:Valine, leucine and isoleucine biosynthesis,hsa00970:Aminoacyl-tRNA biosynthesis,
36647_at	iars2	isoleucyl-tRNA synthetase 2, mitochondrial	1q41	55699		hsa00290:Valine, leucine and isoleucine biosynthesis,hsa00970:Aminoacyl-tRNA biosynthesis,
36875_at	Ibtk	inhibitor of Bruton agammaglobulinemia tyrosine kinase	6q14.1	25998
40758_at	ICT1	immature colon carcinoma transcript 1	17q25.1	3396
39023_at	IDH1	isocitrate dehydrogenase 1 (NADP+), soluble	2q33.3	3417		hsa00020:Citrate cycle (TCA cycle),hsa00480:Glutathione metabolism,
1456_s_at	IFI16	interferon, gamma-inducible protein 16	1q22	3428
675_at	Ifitm1	interferon induced transmembrane protein 1 (9-27)	11p15.5	8519		hsa04662:B cell receptor signaling pathway,
41745_at, 676_g_at	ifitm3	interferon induced transmembrane protein 3 (1-8U)	11p15.5	10410
1568_s_at	IFNAR2	interferon (alpha, beta and omega) receptor 2	21q22.1 21q22.1|21q22.11	3455	Hepatitis B virus, susceptibility to,	hsa04060:Cytokine-cytokine receptor interaction,hsa04620:Toll-like receptor signaling pathway,hsa04630:Jak-STAT signaling pathway,hsa04650:Natural killer cell mediated cytotoxicity,
1038_s_at	IFNGR1	interferon gamma receptor 1	6q23.3	3459	BCG infection, generalized familial,H. pylori infection, susceptibility to,Mycobacterial infection, atypical, familial disseminated,Mycobacterium tuberculosis infection, protection against,Tuberculosis, susceptibility to,	hsa04060:Cytokine-cytokine receptor interaction,hsa04630:Jak-STAT signaling pathway,hsa04650:Natural killer cell mediated cytotoxicity,
41140_at	IFNGR2	interferon gamma receptor 2 (interferon gamma transducer 1)	21q22.11	3460	Mycobacterial infection, atypical, familial disseminated,	hsa04060:Cytokine-cytokine receptor interaction,hsa04630:Jak-STAT signaling pathway,hsa04650:Natural killer cell mediated cytotoxicity,
36613_at	Ifrd2	interferon-related developmental regulator 2	3p21.3	7866
34718_at	IGF1R	insulin-like growth factor 1 receptor	15q26.3	3480	Insulin-like growth factor I, resistance to,Intrauterine and postnatal growth retardation,	hsa04114:Oocyte meiosis,hsa04144:Endocytosis,hsa04510:Focal adhesion,hsa04520:Adherens junction,hsa04730:Long-term depression,hsa04914:Progesterone-mediated oocyte maturation,hsa05200:Pathways in cancer,hsa05210:Colorectal cancer,hsa05214:Glioma,hsa05215:Prostate cancer,hsa05218:Melanoma,
37558_at	igf2bp3	insulin-like growth factor 2 mRNA binding protein 3	7p11	10643
40422_at	igfbp2	insulin-like growth factor binding protein 2, 36kDa	2q33-q34	3485	Genome-wide association study targeting type 2 diabetes.,
39781_at	igfbp4	insulin-like growth factor binding protein 4	17q12-q21.1	3487
2062_at	igfbp7	insulin-like growth factor binding protein 7	4q12	3490
38046_at	Ik LOC644456	similar to CG18005; IK cytokine, down-regulator of HLA II	2p15-p14 2p15-p14|5q31.3 2p16.1	3550 644456
34344_at	IKBKAP	inhibitor of kappa light polypeptide gene enhancer in B-cells, kinase complex-associated protein	9q31	8518	Dysautonomia, familial,hereditary sensory autonomic neuropathy type III,
33227_at, 33228_g_at	Il10rb	interleukin 10 receptor, beta	21q22.1-q22.2 21q22.1-q22.2|21q22.11	3588	Hepatitis B virus, susceptibility to,	hsa04060:Cytokine-cytokine receptor interaction,hsa04630:Jak-STAT signaling pathway,
37844_at	IL27RA	interleukin 27 receptor, alpha	19p13.11	9466
35842_at	IL6ST	interleukin 6 signal transducer (gp130, oncostatin M receptor)	5q11	3572		hsa04060:Cytokine-cytokine receptor interaction,hsa04630:Jak-STAT signaling pathway,
36189_at	ilf2	interleukin enhancer binding factor 2, 45kDa	1q21.3	3608
40846_g_at, 40845_at, 32751_at	ilf3	interleukin enhancer binding factor 3, 90kDa	19p13.2	3609
35365_at	ILK	integrin-linked kinase	11p15.5-p15.4	3611		hsa03320:PPAR signaling pathway,hsa04510:Focal adhesion,hsa05213:Endometrial cancer,
37659_at	IMMT	inner membrane protein, mitochondrial (mitofilin)	2p11.2 2p11.2|2	10989
38275_at	IMP4	IMP4, U3 small nucleolar ribonucleoprotein, homolog (yeast)	2q21.1	92856
32697_at	IMPA1	inositol(myo)-1(or 4)-monophosphatase 1	8q21.13-q21.3	3612		hsa00562:Inositol phosphate metabolism,hsa04070:Phosphatidylinositol signaling system,
40695_at	IMPDH1	IMP (inosine monophosphate) dehydrogenase 1	7q31.3-q32	3614	Leber congenital amaurosis 11,Leber congenital amaurosis XI,Retinitis pigmentosa-10,Retinitis pigmentosa-10 (autosomal dominant),	hsa00230:Purine metabolism,hsa00983:Drug metabolism,
36624_at	Impdh2	IMP (inosine monophosphate) dehydrogenase 2	3p21.2	3615	IMPDH2 enzyme activity, variation in,	hsa00230:Purine metabolism,hsa00983:Drug metabolism,
40357_at	INHBA	inhibin, beta A	7p15-p13	3624		hsa04060:Cytokine-cytokine receptor interaction,hsa04350:TGF-beta signaling pathway,
38168_at	INPP4B	inositol polyphosphate-4-phosphatase, type II, 105kDa	4q31.21	8821		hsa00562:Inositol phosphate metabolism,hsa04070:Phosphatidylinositol signaling system,
36089_at	INPP5F	inositol polyphosphate-5-phosphatase F	10q26.11	22876
39028_at	IPO5	importin 5	13q32.2	3843
35255_at	IPO7	importin 7	11p15.4	10527
1825_at	IQGAP1	IQ motif containing GTPase activating protein 1	15q26.1	8826		hsa04520:Adherens junction,hsa04810:Regulation of actin cytoskeleton,
851_s_at, 872_i_at, 41049_at	IRS1	insulin receptor substrate 1	2q36	3667	Coronary artery disease, susceptibility to,Diabetes mellitus, noninsulin-dependent,	hsa04722:Neurotrophin signaling pathway,hsa04910:Insulin signaling pathway,hsa04920:Adipocytokine signaling pathway,hsa04930:Type II diabetes mellitus,hsa04960:Aldosterone-regulated sodium reabsorption,
1107_s_at	ISG15	ISG15 ubiquitin-like modifier	1p36.33	9636		hsa04622:RIG-I-like receptor signaling pathway,
1978_at, 41481_at	ITGA2	integrin, alpha 2 (CD49B, alpha 2 subunit of VLA-2 receptor)	5q23-q31	3673	?Glycoprotein Ia deficiency,Neonatal alloimmune thrombocytopenia,	hsa04510:Focal adhesion,hsa04512:ECM-receptor interaction,hsa04640:Hematopoietic cell lineage,hsa04810:Regulation of actin cytoskeleton,hsa05200:Pathways in cancer,hsa05222:Small cell lung cancer,hsa05410:Hypertrophic cardiomyopathy (HCM),hsa05412:Arrhythmogenic right ventricular cardiomyopathy (ARVC),hsa05414:Dilated cardiomyopathy,
885_g_at, 884_at	ITGA3	integrin, alpha 3 (antigen CD49C, alpha 3 subunit of VLA-3 receptor)	17q21.33	3675		hsa04510:Focal adhesion,hsa04512:ECM-receptor interaction,hsa04640:Hematopoietic cell lineage,hsa04810:Regulation of actin cytoskeleton,hsa05200:Pathways in cancer,hsa05222:Small cell lung cancer,hsa05410:Hypertrophic cardiomyopathy (HCM),hsa05412:Arrhythmogenic right ventricular cardiomyopathy (ARVC),hsa05414:Dilated cardiomyopathy,
39753_at	ITGA5	integrin, alpha 5 (fibronectin receptor, alpha polypeptide)	12q11-q13	3678		hsa04510:Focal adhesion,hsa04512:ECM-receptor interaction,hsa04640:Hematopoietic cell lineage,hsa04810:Regulation of actin cytoskeleton,hsa05410:Hypertrophic cardiomyopathy (HCM),hsa05412:Arrhythmogenic right ventricular cardiomyopathy (ARVC),hsa05414:Dilated cardiomyopathy,
41266_at, 33410_at, 33411_g_at	itga6	integrin, alpha 6	2q31.1	3655	Epidermolysis bullosa, junctional, with pyloric stenosis,	hsa04510:Focal adhesion,hsa04512:ECM-receptor interaction,hsa04514:Cell adhesion molecules (CAMs),hsa04640:Hematopoietic cell lineage,hsa04810:Regulation of actin cytoskeleton,hsa05200:Pathways in cancer,hsa05222:Small cell lung cancer,hsa05410:Hypertrophic cardiomyopathy (HCM),hsa05412:Arrhythmogenic right ventricular cardiomyopathy (ARVC),hsa05414:Dilated cardiomyopathy,
1140_at	ITGAE	integrin, alpha E (antigen CD103, human mucosal lymphocyte antigen 1; alpha polypeptide)	17p13	3682		hsa04810:Regulation of actin cytoskeleton,
39071_at	Itgav	integrin, alpha V (vitronectin receptor, alpha polypeptide, antigen CD51)	2q31-q32	3685		hsa04510:Focal adhesion,hsa04512:ECM-receptor interaction,hsa04514:Cell adhesion molecules (CAMs),hsa04810:Regulation of actin cytoskeleton,hsa05200:Pathways in cancer,hsa05222:Small cell lung cancer,hsa05410:Hypertrophic cardiomyopathy (HCM),hsa05412:Arrhythmogenic right ventricular cardiomyopathy (ARVC),hsa05414:Dilated cardiomyopathy,
32808_at	Itgb1	integrin, beta 1 (fibronectin receptor, beta polypeptide, antigen CD29 includes MDF2, MSK12)	10p11.2	3688		hsa04360:Axon guidance,hsa04510:Focal adhesion,hsa04512:ECM-receptor interaction,hsa04514:Cell adhesion molecules (CAMs),hsa04670:Leukocyte transendothelial migration,hsa04810:Regulation of actin cytoskeleton,hsa05130:Pathogenic Escherichia coli infection,hsa05200:Pathways in cancer,hsa05222:Small cell lung cancer,hsa05410:Hypertrophic cardiomyopathy (HCM),hsa05412:Arrhythmogenic right ventricula…
40843_at	itgb1bp1	integrin beta 1 binding protein 1	2p25.2	9270
38501_s_at	ITGB3BP	integrin beta 3 binding protein (beta3-endonexin)	1p31.3	23421
406_at, 38746_at	ITGB4	integrin, beta 4	17q25	3691	Epidermolysis bullosa of hands and feet,Epidermolysis bullosa, generalized atrophic benign,Epidermolysis bullosa, junctional, non-Herlitz type,Epidermolysis bullosa, junctional, with pyloric atresia,	hsa04510:Focal adhesion,hsa04512:ECM-receptor interaction,hsa04810:Regulation of actin cytoskeleton,hsa05410:Hypertrophic cardiomyopathy (HCM),hsa05412:Arrhythmogenic right ventricular cardiomyopathy (ARVC),hsa05414:Dilated cardiomyopathy,
2058_s_at, 39754_at	Itgb5	integrin, beta 5	3q21.2	3693		hsa04510:Focal adhesion,hsa04512:ECM-receptor interaction,hsa04810:Regulation of actin cytoskeleton,hsa05410:Hypertrophic cardiomyopathy (HCM),hsa05412:Arrhythmogenic right ventricular cardiomyopathy (ARVC),hsa05414:Dilated cardiomyopathy,
881_at	ITGB6	integrin, beta 6	2q24.2	3694		hsa04510:Focal adhesion,hsa04512:ECM-receptor interaction,hsa04810:Regulation of actin cytoskeleton,hsa05410:Hypertrophic cardiomyopathy (HCM),hsa05412:Arrhythmogenic right ventricular cardiomyopathy (ARVC),hsa05414:Dilated cardiomyopathy,
35801_at	itpa	inosine triphosphatase (nucleoside triphosphate pyrophosphatase)	20p	3704	Inosine triphosphatase deficiency,	hsa00230:Purine metabolism,hsa00240:Pyrimidine metabolism,hsa00983:Drug metabolism,
182_at, 37343_at	ITPR3	inositol 1,4,5-triphosphate receptor, type 3	6p21	3710	Diabetes, type 1, susceptibility to,	hsa04020:Calcium signaling pathway,hsa04070:Phosphatidylinositol signaling system,hsa04114:Oocyte meiosis,hsa04270:Vascular smooth muscle contraction,hsa04540:Gap junction,hsa04720:Long-term potentiation,hsa04730:Long-term depression,hsa04742:Taste transduction,hsa04912:GnRH signaling pathway,hsa05010:Alzheimer's disease,
33752_at	IVNS1ABP	influenza virus NS1A binding protein	1q25.1-q31.1	10625
35414_s_at	JAG1	jagged 1 (Alagille syndrome)	20p12.1-p11.23	182	Alagille syndrome,Deafness, congenital heart defects, and posterior embryotoxon,Tetralogy of Fallot,	hsa04330:Notch signaling pathway,
32137_at	JAG2	jagged 2	14q32	3714		hsa04330:Notch signaling pathway,
40899_at	JUP	junction plakoglobin	17q21	3728	Arrhythmogenic right ventricular dysplasia, familial, 12,Naxos disease,	hsa05200:Pathways in cancer,hsa05221:Acute myeloid leukemia,hsa05412:Arrhythmogenic right ventricular cardiomyopathy (ARVC),
34336_at	KARS	lysyl-tRNA synthetase	16q23-q24	3735		hsa00970:Aminoacyl-tRNA biosynthesis,
32807_at	KBTBD2	kelch repeat and BTB (POZ) domain containing 2	7p14.3	25948
35472_at	KCNJ15	potassium inwardly-rectifying channel, subfamily J, member 15	21q22.2	3772
38972_at	kctd12	potassium channel tetramerisation domain containing 12	13q22.3	115207
33402_at	KDELR3	KDEL (Lys-Asp-Glu-Leu) endoplasmic reticulum protein retention receptor 3	22q13.1	11015		hsa05110:Vibrio cholerae infection,
41122_at	KDM1A	lysine (K)-specific demethylase 1	1p36.12	23028
36120_at	kdsr	3-ketodihydrosphingosine reductase	18q21.3	2531	Lymphoma/leukemia, B-cell, variant,	hsa00600:Sphingolipid metabolism,
39346_at	Khdrbs1	KH domain containing, RNA binding, signal transduction associated 1	1p32	10657
38828_s_at	khsrp	KH-type splicing regulatory protein	19p13.3	8570
34765_at	KIAA0020	KIAA0020	9p24.2	9933
38116_at	kiaa0101	KIAA0101	15q22.31	9768
36474_at	KIAA0776	KIAA0776	6q16.1	23376
39614_at	KIAA0802	KIAA0802	18p11.22	23255
41595_at	KIAA0947	KIAA0947	5p15.32	23379
40831_at	KIAA1279	KIAA1279	10q21.3	26128	Goldberg-Shprintzen megacolon syndrome,
40726_at	KIF11	kinesin family member 11	10q24.1	3832
34563_at	KIF14	kinesin family member 14	1q32.1	9928
37171_at	KIF23	kinesin family member 23	15q23	9493
41474_at	KIF2A	kinesin heavy chain member 2A	5q12-q13	3796
34713_at	kif3b	kinesin family member 3B	20q11.21	9371
349_g_at	KIFC1	kinesin family member C1	6p21.3	3833
39057_at	KLC1	kinesin light chain 1	14q32.3	3831
38674_at	KLHL9	kelch-like 9 (Drosophila)	9p22	55958		hsa04120:Ubiquitin mediated proteolysis,
34031_i_at	KRIT1	KRIT1, ankyrin repeat containing	7q21-q22	889	Cavernous malformations of CNS and retina,Cerebral cavernous malformations-1,Hyperkeratotic cutaneous capillary-venous malformations associated with cerebral capillary malformations,
40250_at	KRR1	KRR1, small subunit (SSU) processome component, homolog (yeast)	12q21.2	11103
39052_at	Krt14	keratin 14	17q12-q21	3861	Dermatopathia pigmentosa reticularis,Epidermolysis bullosa simplex, Dowling-Meara type,Epidermolysis bullosa simplex, Koebner type,Epidermolysis bullosa simplex, Koebner, Dowling-Meara, and Weber-Cockayne types, 131900, 131760,Epidermolysis bullosa simplex, recessive,Epidermolysis bullosa simplex, Weber-Cockayne type,Naegeli-Franceschetti-Jadassohn syndrome,
37582_at	Krt15	keratin 15	17q21.2	3866
35766_at	KRT18 KRT18P19 KRT18P26	keratin 18; keratin 18 pseudogene 26; keratin 18 pseudogene 19	12q13 2p13.1 2q32.2	339781 3875 729634	Cirrhosis, cryptogenic,Cirrhosis, noncryptogenic, susceptibility to,	hsa05130:Pathogenic Escherichia coli infection,
613_at	KRT5	keratin 5	12q12-q13	3852	Dowling-Degos disease,Epidermolysis bullosa simplex with migratory circinate erythema,Epidermolysis bullosa simplex with mottled pigmentation,Epidermolysis bullosa simplex, Dowling-Meara type,Epidermolysis bullosa simplex, Koebner type,Epidermolysis bullosa simplex, Koebner, Dowling-Meara, and Weber-Cockayne types, 131900, 131760,Epidermolysis bullosa simplex, Weber-Cockayne type,
41294_at	Krt7	keratin 7	12q12-q13	3855
38551_at	L1cam	L1 cell adhesion molecule	Xq28	3897	Corpus callosum, partial agenesis of,CRASH syndrome,Hydrocephalus due to aqueductal stenosis,Hydrocephalus with congenital idiopathic intestinal pseudoobstruction,Hydrocephalus with Hirschsprung disease and cleft palate,MASA syndrome,	hsa04360:Axon guidance,hsa04514:Cell adhesion molecules (CAMs),
37909_at	LAMA3	laminin, alpha 3	18q11.2	3909	Epidermolysis bullosa, generalized atrophic benign,Epidermolysis bullosa, junctional, Herlitz type,Laryngoonychocutaneous syndrome,	hsa04510:Focal adhesion,hsa04512:ECM-receptor interaction,hsa05200:Pathways in cancer,hsa05222:Small cell lung cancer,
41610_at	LAMA5	laminin, alpha 5	20q13.2-q13.3	3911		hsa04510:Focal adhesion,hsa04512:ECM-receptor interaction,hsa05200:Pathways in cancer,hsa05222:Small cell lung cancer,
581_at	LAMB1	laminin, beta 1	7q22	3912		hsa04510:Focal adhesion,hsa04512:ECM-receptor interaction,hsa05200:Pathways in cancer,hsa05222:Small cell lung cancer,
36929_at	Lamb3	laminin, beta 3	1q32	3914	Epidermolysis bullosa, generalized atrophic benign,Epidermolysis bullosa, Herlitz junctional type,Epidermolysis bullosa, junctional, Herlitz type,Epidermolysis bullosa, junctional, non-Herlitz type,	hsa04510:Focal adhesion,hsa04512:ECM-receptor interaction,hsa05200:Pathways in cancer,hsa05222:Small cell lung cancer,
232_at	LAMC1	laminin, gamma 1 (formerly LAMB2)	1q31	3915	?Pelvic organ prolapse, susceptibility to,	hsa04510:Focal adhesion,hsa04512:ECM-receptor interaction,hsa05020:Prion diseases,hsa05200:Pathways in cancer,hsa05222:Small cell lung cancer,
35280_at, 35281_at	LAMC2	laminin, gamma 2	1q25-q31	3918	Epidermolysis bullosa, generalized atrophic benign,Epidermolysis bullosa, Herlitz junctional type,Epidermolysis bullosa, junctional, Herlitz type,Epidermolysis bullosa, junctional, non-Herlitz type,	hsa04510:Focal adhesion,hsa04512:ECM-receptor interaction,hsa05200:Pathways in cancer,hsa05222:Small cell lung cancer,
39441_at	lancl1	LanC lantibiotic synthetase component C-like 1 (bacterial)	2q33-q35	10314
41188_at	Laptm4b	lysosomal protein transmembrane 4 beta	8q22.1	55353		hsa04142:Lysosome,
34764_at	Lars2	leucyl-tRNA synthetase 2, mitochondrial	3p21.3	23395		hsa00290:Valine, leucine and isoleucine biosynthesis,hsa00970:Aminoacyl-tRNA biosynthesis,
38260_at	LAS1L	LAS1-like (S. cerevisiae)	Xq12-q13	81887
36181_at	LASP1	LIM and SH3 protein 1	17q11-q21.3	3927
288_s_at	LBR	lamin B receptor	1q42.1	3930	Greenberg dysplasia,Pelger-Huet anomaly,
41485_at	LdhA	lactate dehydrogenase A	11p15.4	3939	Exertional myoglobinuria due to deficiency of LDH-A,	hsa00010:Glycolysis / Gluconeogenesis,hsa00270:Cysteine and methionine metabolism,hsa00620:Pyruvate metabolism,hsa00640:Propanoate metabolism,
33819_at	ldhb	lactate dehydrogenase B	12p12.2-p12.1	3945	Lactate dehydrogenase-B deficiency,	hsa00010:Glycolysis / Gluconeogenesis,hsa00270:Cysteine and methionine metabolism,hsa00620:Pyruvate metabolism,hsa00640:Propanoate metabolism,
33412_at	LGALS1	lectin, galactoside-binding, soluble, 1	22q13.1	3956
35367_at	LGALS3	lectin, galactoside-binding, soluble, 3	14q21-q22	3958
37754_at	LGALS3BP	lectin, galactoside-binding, soluble, 3 binding protein	17q25	3959
37542_at	LHFPL2	lipoma HMGIC fusion partner-like 2	5q14.1	10184
38618_at	LIMK2	LIM domain kinase 2	22q12.2	3985		hsa04360:Axon guidance,hsa04666:Fc gamma R-mediated phagocytosis,hsa04810:Regulation of actin cytoskeleton,
39232_at	LIMS1	LIM and senescent cell antigen-like domains 1	2q12.3-q13	3987
38745_at	lipA	lipase A, lysosomal acid, cholesterol esterase	10q23.2-q23.3	3988	Cholesteryl ester storage disease,Wolman disease,	hsa00100:Steroid biosynthesis,hsa04142:Lysosome,
36955_at	Lman2	lectin, mannose-binding 2	5q35.3	10960
37985_at	LMNB1	lamin B1	5q23.3-q31.1	4001	Leukodystrophy, adult-onset, autosomal dominant,
36987_at	Lmnb2	lamin B2	19p13.3	84823	Lipodystrophy, partial, acquired,
1695_at	LOC100128775 nedd8	neural precursor cell expressed, developmentally down-regulated 8; similar to neural precursor cell expressed, developmentally down-regulated gene 8	14q12 1p31.1	100128775 4738
31463_s_at	LOC100128836	similar to heterogeneous nuclear ribonucleoprotein A1	8q21.13	100128836
36198_at	LOC100129272 LOC100131463 TOMM20	similar to translocase of outer mitochondrial membrane 20 homolog; similar to mitochondrial outer membrane protein 19; translocase of outer mitochondrial membrane 20 homolog (yeast)	1q42 X Xq13.2	100129272 100131463 9804
36023_at	LOC100129361	similar to mCG115122	12p13.2	100129361
39731_at	LOC100129585 LOC100131735 RBMX	similar to RNA binding motif protein, X-linked; similar to hCG2011544; RNA binding motif protein, X-linked	9 Xq11.2 Xq26.3	100129585 100131735 27316		hsa03040:Spliceosome,
37337_at	LOC100130003 LOC100130289 LOC100130932 LOC100132425 Snrpg	hypothetical protein LOC100132425; similar to small nuclear ribonucleoprotein polypeptide G; small nuclear ribonucleoprotein polypeptide G; small nuclear ribonucleoprotein G-like protein	10p13 18q21.2 19p13.12 1q32.1 2p14	100130003 100130289 100130932 100132425 6637		hsa03040:Spliceosome,
38679_g_at	LOC100130109 SNRPE SNRPEL1	small nuclear ribonucleoprotein polypeptide E-like 1; small nuclear ribonucleoprotein polypeptide E; similar to hCG23490	19p13.3 1q32 9p24.1	100130109 414153 6635		hsa03040:Spliceosome,
38060_at	LOC100130794 Ndufs5	similar to NADH dehydrogenase (ubiquinone) Fe-S protein 5, 15kDa (NADH-coenzyme Q reductase); NADH dehydrogenase (ubiquinone) Fe-S protein 5, 15kDa (NADH-coenzyme Q reductase)	17q11.2 1p34.2-p33	100130794 4725		hsa00190:Oxidative phosphorylation,hsa05010:Alzheimer's disease,hsa05012:Parkinson's disease,hsa05016:Huntington's disease,
38542_at	LOC100131044 LOC399804 LOC440577 LOC729342 LOC729686 Npm1 NPM1P21	nucleophosmin 1 (nucleolar phosphoprotein B23, numatrin) pseudogene 21; hypothetical LOC100131044; similar to nucleophosmin 1; nucleophosmin (nucleolar phosphoprotein B23, numatrin)	10q22.1 10q23.33 15q24.1 1p36.11 2q33.1 5q35 8q12.1	100129237 100131044 399804 440577 4869 729342 729686	Leukemia, acute myeloid,Leukemia, acute promyelocytic, NPM/RARA type,
38106_at	LOC100132658 LOC400061 NSA2	hypothetical gene supported by NM_014886; TGF beta-inducible nuclear protein 1; similar to TGF beta-inducible nuclear protein 1	12q22 5q13.3 Xq22.1	100132658 10412 400061
32827_at, 1837_at	LOC100133211 RRAS2	related RAS viral (r-ras) oncogene homolog 2; similar to related RAS viral (r-ras) oncogene homolog 2	11p15.2 1p32.3	100133211 22800	Ovarian carcinoma,	hsa04010:MAPK signaling pathway,hsa04530:Tight junction,hsa04810:Regulation of actin cytoskeleton,
35270_at	LOC119358 snrpd2	small nuclear ribonucleoprotein D2 polypeptide 16.5kDa; similar to hCG2040270	10q23.31 19q13.2	119358 6633		hsa03040:Spliceosome,
40407_at	LOC146880	hypothetical LOC146880	17q24	146880
39129_at	LOC150776	sphingomyelin phosphodiesterase 4, neutral membrane pseudogene	2q21.1	150776
39252_at	LOC283398 suclg2	similar to sucb; succinate-CoA ligase, GDP-forming, beta subunit	12q22 3p14.1	283398 8801		hsa00020:Citrate cycle (TCA cycle),hsa00640:Propanoate metabolism,
895_at	LOC284889	hypothetical protein LOC284889	22q11.23	284889
41342_at	LOC389842 LOC727803 RanBP1	similar to RAN binding protein 1; RAN binding protein 1	12q21.2 22q11.21 Xp21.3	389842 5902 727803
32766_at	LOC389901 XRCC6	X-ray repair complementing defective repair in Chinese hamster cells 6; similar to ATP-dependent DNA helicase II, 70 kDa subunit	22q13.2-q13.31 Xq28	2547 389901		hsa03450:Non-homologous end-joining,
32272_at	LOC399942 TUBA1B	hypothetical gene supported by AF081484; NM_006082; tubulin, alpha 1b	11q14.3 12q13.12	10376 399942		hsa04540:Gap junction,hsa05130:Pathogenic Escherichia coli infection,
33667_at	LOC439953 ppiA PPIAL3	similar to TRIMCyp; peptidylprolyl isomerase A (cyclophilin A); peptidylprolyl isomerase A (cyclophilin A)-like 3	10p11.22 21q21.1 7p13	439953 5478 653214
41733_at	LOC440354 LOC595101	PI-3-kinase-related kinase SMG-1 pseudogene	16p11.2	440354 595101
38589_i_at, 38590_r_at	LOC441454 LOC728026 PTMA PTMAP4	hypothetical LOC728026; prothymosin, alpha; hypothetical gene supported by BC013859; prothymosin, alpha pseudogene 4 (gene sequence 112)	12p13.31 2q35-q36 9q22.32 9q22.33	441454 5757 5761 728026	Many sequence variants affecting diversity of adult human height,
151_s_at, 709_at	LOC442308 tubB TUBBP1 TUBBP2	tubulin, beta; similar to tubulin, beta 5; tubulin, beta pseudogene 2; tubulin, beta pseudogene 1	13q14.11 6p21.33 6p25 7p11.2 8p12	203068 442308 647000 92755		hsa04540:Gap junction,hsa05130:Pathogenic Escherichia coli infection,
36186_at	LOC643446 RnpS1	similar to ribonucleic acid binding protein S1; RNA binding protein S1, serine-rich domain	16p13.3 4p15.33	10921 643446
33866_at	LOC643634	similar to tropomyosin 4	3p24.1	643634
38978_at	LOC645139 Paip1	poly(A) binding protein interacting protein 1; similar to poly(A) binding protein interacting protein 1	17p11.2 5p12	10605 645139
40189_at	LOC646817 set	SET nuclear oncogene; similar to SET translocation	1p22.1 9q34	6418 646817
39009_at	LOC647302 LSM3	LSM3 homolog, U6 small nuclear RNA associated (S. cerevisiae); similar to Lsm3 protein	2p11.2 3p25.1	27258 647302		hsa03018:RNA degradation,hsa03040:Spliceosome,
36060_at	LOC650638 srp54	similar to signal recognition particle 54kDa; signal recognition particle 54kDa	14q13.2	650638 6729		hsa03060:Protein export,
41224_at	LOC652147 SNRNP200	similar to U5 snRNP-specific protein, 200 kDa; small nuclear ribonucleoprotein 200kDa (U5)	2q11.2	23020 652147		hsa03040:Spliceosome,
38022_s_at, 38021_at	LOC652460 PLEC	similar to Plectin 1 (PLTN) (PCN) (Hemidesmosomal protein 1) (HD1); plectin 1, intermediate filament binding protein 500kDa	8q24	5339 652460	Epidermolysis bullosa simplex with pyloric atresia,Epidermolysis bullosa simplex, Ogna type,Muscular dystrophy with epidermolysis bullosa simplex,
32378_at	LOC652797 PKM2	similar to Pyruvate kinase, isozymes M1/M2 (Pyruvate kinase muscle isozyme) (Cytosolic thyroid hormone-binding protein) (CTHBP) (THBP1); pyruvate kinase, muscle	15q22	5315 652797		hsa00010:Glycolysis / Gluconeogenesis,hsa00230:Purine metabolism,hsa00620:Pyruvate metabolism,hsa04930:Type II diabetes mellitus,
37359_at	LOC653566 spcs2	signal peptidase complex subunit 2 homolog (S. cerevisiae); signal peptidase complex subunit 2 homolog pseudogene	11q13.4 1p35.3	653566 9789
31722_at	LOC653881 RPL3	ribosomal protein L3; similar to 60S ribosomal protein L3 (L4)	22 22q13	6122 653881		hsa03010:Ribosome,
34717_s_at, 34716_at	LOC653884 SFRS13A	FUS interacting protein (serine/arginine-rich) 1; similar to FUS interacting protein (serine-arginine rich) 1	1 1p36.11	10772 653884		hsa03040:Spliceosome,
34830_at	LOC729086 vopp1	similar to EGFR-coamplified and overexpressed protein; EGFR-coamplified and overexpressed protein	1q21.1 7p11.2	729086 81552
1250_at, 2012_s_at, 40129_at	LOC731751 PRKDC	similar to protein kinase, DNA-activated, catalytic polypeptide; protein kinase, DNA-activated, catalytic polypeptide	8q11	5591 731751		hsa03450:Non-homologous end-joining,hsa04110:Cell cycle,
40387_at	lpar1	lysophosphatidic acid receptor 1	9q31.3	1902		hsa04080:Neuroactive ligand-receptor interaction,hsa04540:Gap junction,
41177_at	lpcat1	lysophosphatidylcholine acyltransferase 1	5p15.33	79888
33710_at	Lpcat3	lysophosphatidylcholine acyltransferase 3	12p13	10162
34387_at	lpgat1	lysophosphatidylglycerol acyltransferase 1	1q32	9926
38098_at	lpin1	lipin 1	2p25.1	23175	Myoglobinuria, acute recurrent, autosomal recessive,
36062_at	Lpxn	leupaxin	11q12.1	9404
34800_at	lrig1	leucine-rich repeats and immunoglobulin-like domains 1	3p14	26018
40012_at	LRP8	low density lipoprotein receptor-related protein 8, apolipoprotein e receptor	1p34	7804	Myocardial infarction, premature, susceptibility to,Myocardial infarction, susceptibility to,
41754_at	lrpprc	leucine-rich PPR-motif containing	2p21	10128	Leigh syndrome, French-Canadian type,
35732_at	LRRC42	leucine rich repeat containing 42	1p33-p32.1	115353
41320_s_at	Lrrfip1	leucine rich repeat (in FLII) interacting protein 1	2q37.3	9208
39017_at	LSM1	LSM1 homolog, U6 small nuclear RNA associated (S. cerevisiae)	8p11.2	27257		hsa03018:RNA degradation,
41375_at	LSM2	LSM2 homolog, U6 small nuclear RNA associated (S. cerevisiae)	6p21.3	57819		hsa03018:RNA degradation,hsa03040:Spliceosome,
32559_s_at	LSM4	LSM4 homolog, U6 small nuclear RNA associated (S. cerevisiae)	19p13.11	25804		hsa03018:RNA degradation,hsa03040:Spliceosome,
35991_at	lsm6	LSM6 homolog, U6 small nuclear RNA associated (S. cerevisiae)	4q31.22	11157		hsa03018:RNA degradation,hsa03040:Spliceosome,
36846_s_at	lsm7	LSM7 homolog, U6 small nuclear RNA associated (S. cerevisiae)	19p13.3	51690		hsa03018:RNA degradation,hsa03040:Spliceosome,
38324_at	lsr	lipolysis stimulated lipoprotein receptor	19q13.12	51599
39108_at	LSS	lanosterol synthase (2,3-oxidosqualene-lanosterol cyclase)	21q22.3	4047		hsa00100:Steroid biosynthesis,
38081_at	LTA4H	leukotriene A4 hydrolase	12q22	4048		hsa00590:Arachidonic acid metabolism,
37906_at	LTBP2	latent transforming growth factor beta binding protein 2	14q24	4053
37282_at, 1721_g_at	Mad2l1	MAD2 mitotic arrest deficient-like 1 (yeast)	4q27	4085		hsa04110:Cell cycle,hsa04114:Oocyte meiosis,hsa04914:Progesterone-mediated oocyte maturation,
40036_at	MAGOH	mago-nashi homolog, proliferation-associated (Drosophila)	1p34-p33	4116		hsa03040:Spliceosome,
37297_at	MAK16	MAK16 homolog (S. cerevisiae)	8p12	84549
1844_s_at	MAP2K1	mitogen-activated protein kinase kinase 1	15q22.1-q22.33	5604		hsa04010:MAPK signaling pathway,hsa04012:ErbB signaling pathway,hsa04062:Chemokine signaling pathway,hsa04114:Oocyte meiosis,hsa04270:Vascular smooth muscle contraction,hsa04320:Dorso-ventral axis formation,hsa04370:VEGF signaling pathway,hsa04510:Focal adhesion,hsa04540:Gap junction,hsa04620:Toll-like receptor signaling pathway,hsa04650:Natural killer cell mediated cytotoxicity,hsa04660:T cell r…
35694_at	MAP4K4	mitogen-activated protein kinase kinase kinase kinase 4	2q11.2-q12	9448		hsa04010:MAPK signaling pathway,
38093_at	MAPK1IP1L	mitogen-activated protein kinase 1 interacting protein 1-like	14q22.3	93487
33456_at	Mapre1	microtubule-associated protein, RP/EB family, member 1	20q11.1-q11.23	22919
33905_at	MBD2	methyl-CpG binding domain protein 2	18q21	8932
34386_at	MBD4	methyl-CpG binding domain protein 4	3q21-q22	8930		hsa03410:Base excision repair,
34306_at	Mbnl1	muscleblind-like (Drosophila)	3q25	4154
35312_at	mcm2	minichromosome maintenance complex component 2	3q21	4171		hsa03030:DNA replication,hsa04110:Cell cycle,
33252_at	MCM3	minichromosome maintenance complex component 3	6p12	4172		hsa03030:DNA replication,hsa04110:Cell cycle,
982_at	Mcm5	minichromosome maintenance complex component 5	22q13.1	4174		hsa03030:DNA replication,hsa04110:Cell cycle,
40117_at	MCM6	minichromosome maintenance complex component 6	2q21	4175	Hypolactasia, adult type,Lactase persistance/nonpersistance,Tall stature, susceptibility to,	hsa03030:DNA replication,hsa04110:Cell cycle,
947_at	MCM7	minichromosome maintenance complex component 7	7q21.3-q22.1	4176		hsa03030:DNA replication,hsa04110:Cell cycle,
32662_at, 32661_s_at	MDC1	mediator of DNA-damage checkpoint 1	6p21.3	9656
36608_at	Mdh1	malate dehydrogenase 1, NAD (soluble)	2p13.3	4190		hsa00020:Citrate cycle (TCA cycle),hsa00620:Pyruvate metabolism,hsa00630:Glyoxylate and dicarboxylate metabolism,
38847_at	Melk	maternal embryonic leucine zipper kinase	9p13.2	9833
35684_at, 1609_g_at, 1812_s_at	MET	met proto-oncogene (hepatocyte growth factor receptor)	7q31	4233	Autism, suseptibility to, 9,Genome-wide association analysis of susceptibility and clinical phenotype in multiple sclerosis,Hepatocellular carcinoma, childhood type,Renal cell carcinoma, papillary, familial and sporadic,	hsa04060:Cytokine-cytokine receptor interaction,hsa04144:Endocytosis,hsa04360:Axon guidance,hsa04510:Focal adhesion,hsa04520:Adherens junction,hsa05120:Epithelial cell signaling in Helicobacter pylori infection,hsa05200:Pathways in cancer,hsa05210:Colorectal cancer,hsa05211:Renal cell carcinoma,hsa05218:Melanoma,
37619_at	METAP1	methionyl aminopeptidase 1	4q23	23173
32245_at, 32246_g_at	METTL3	methyltransferase like 3	14q11.1	56339
36513_at	MFAP5	microfibrillar associated protein 5	12p13.1-p12.3	8076
34369_at	MFN2	mitofusin 2	1p36.22	9927	Charcot-Marie-Tooth disease, type 2A2,Hereditary motor and sensory neuropathy VI,
32080_at	MFSD10	major facilitator superfamily domain containing 10	4p16.3	10227
820_at	mgst2	microsomal glutathione S-transferase 2	4q28.3	4258		hsa00480:Glutathione metabolism,hsa00980:Metabolism of xenobiotics by cytochrome P450,hsa00982:Drug metabolism,
39018_at	Mgst3	microsomal glutathione S-transferase 3	1q23	4259		hsa00480:Glutathione metabolism,hsa00980:Metabolism of xenobiotics by cytochrome P450,hsa00982:Drug metabolism,
40755_at	micA	MHC class I polypeptide-related sequence A	6p21.3 6p21.33	4276		hsa04650:Natural killer cell mediated cytotoxicity,
40848_g_at	MICAL2	microtubule associated monoxygenase, calponin and LIM domain containing 2	11p15.3	9645
35937_at	micB	MHC class I polypeptide-related sequence B	6p21.3	4277	Genomewide Association Study of an AIDS-Nonprogression Cohort Emphasizes the Role Played by HLA Genes (ANRS Genomewide Association Study 02).,	hsa04650:Natural killer cell mediated cytotoxicity,
36830_at	MIPEP	mitochondrial intermediate peptidase	13q12	4285
35299_at	mknk1	MAP kinase interacting serine/threonine kinase 1	1p33	8569		hsa04010:MAPK signaling pathway,hsa04910:Insulin signaling pathway,
41728_at	Mlec	malectin	12q24.31	9761
38428_at	Mmp1	matrix metallopeptidase 1 (interstitial collagenase)	11q22.3	4312	COPD, rate of decline of lung function in,Epidermolysis bullosa dystrophica, autosomal recessive, modifier of,	hsa03320:PPAR signaling pathway,hsa05200:Pathways in cancer,hsa05219:Bladder cancer,
31859_at	Mmp9	matrix metallopeptidase 9 (gelatinase B, 92kDa gelatinase, 92kDa type IV collagenase)	20q11.2-q13.1	4318	Lumbar disc herniation, susceptibility to,	hsa04670:Leukocyte transendothelial migration,hsa05200:Pathways in cancer,hsa05219:Bladder cancer,
35273_at	MMS19	MMS19 nucleotide excision repair homolog (S. cerevisiae)	10q24-q25	64210
1688_s_at, 38387_at	Mnat1	menage a trois homolog 1, cyclin H assembly factor (Xenopus laevis)	14q23	4331		hsa03420:Nucleotide excision repair,
37181_at	MPV17	MpV17 mitochondrial inner membrane protein	2p23.3	4358	Mitochondrial DNA depletion syndrome, hepatocerebral form,
39812_at	mRpL12	mitochondrial ribosomal protein L12	17q25	6182
37174_at	MRPL19	mitochondrial ribosomal protein L19	2q11.1-q11.2	9801
34358_at	MRPL23	mitochondrial ribosomal protein L23	11p15.5-p15.4	6150
1550_at	mrpl28	mitochondrial ribosomal protein L28	16p13.3	10573
37726_at	Mrpl3	mitochondrial ribosomal protein L3	3q21-q23	11222
32745_at	mrpl40	mitochondrial ribosomal protein L40	22q11.21	64976
41514_s_at	mRpL9	mitochondrial ribosomal protein L9	1q21	65005
33214_at	mRpS12	mitochondrial ribosomal protein S12	19q13.1-q13.2	6183
32221_at	mRpS18B	mitochondrial ribosomal protein S18B	6p21.3	28973
39377_at	MRPS27	mitochondrial ribosomal protein S27	5q13.2	23107
861_g_at, 860_at	Msh2	mutS homolog 2, colon cancer, nonpolyposis type 1 (E. coli)	2p22-p21	4436	Cafe-au-lait spots, multiple, with leukemia,Colorectal cancer, hereditary nonpolyposis, type 1,Glioblastoma, early-onset,Lymphoma, T-cell,Lynch cancer family syndrome II,Mismatch repair cancer syndrome,Muir-Torre syndrome,Neurofibromatosis, type I, with leukemia,Ovarian cancer,	hsa03430:Mismatch repair,hsa05200:Pathways in cancer,hsa05210:Colorectal cancer,
2003_s_at	msh6	mutS homolog 6 (E. coli)	2p16	2956	Cancer susceptibility,Colorectal cancer, hereditary nonpolyposis, type 5,Endometrial cancer, familial,Endometrial carcinoma,Mismatch repair cancer syndrome,Ovarian cancer, endometrial type,Ovarian cancer, endometrial type. 608089,Ovarian cancer, endometrioid type,Ovarian cancer, endometrioid type. 604370,	hsa03430:Mismatch repair,hsa05200:Pathways in cancer,hsa05210:Colorectal cancer,
40771_at	msn	moesin	Xq11.2-q12	4478		hsa04670:Leukocyte transendothelial migration,hsa04810:Regulation of actin cytoskeleton,
1317_at	MST1R	macrophage stimulating 1 receptor (c-met-related tyrosine kinase)	3p21.3	4486
31623_f_at	MT1A	metallothionein 1A	16q13	4489
609_f_at	MT1B	metallothionein 1B	16q13	4490
36130_f_at, 41446_f_at	MT1E MT1JP MT1L MT1P3	metallothionein 1L (gene/pseudogene); metallothionein 1E; metallothionein 1 pseudogene 3; metallothionein 1J (pseudogene)	16q13 20q11.2	140851 4493 4498 4500
31622_f_at	MT1F	metallothionein 1F	16q13	4494	Many sequence variants affecting diversity of adult human height,
39594_f_at	MT1H	metallothionein 1H	16q13	4496
39120_at	MT1X	metallothionein 1X	16q13	4501
39081_at	MT2A	metallothionein 2A	16q13	4502
870_f_at	MT3	metallothionein 3	16q13	4504
38633_at, 1643_g_at	Mta1	metastasis associated 1	14q32.3	9112
38150_at	mtaP	methylthioadenosine phosphorylase	9p21	4507		hsa00270:Cysteine and methionine metabolism,
35688_g_at	MTCP1 MTCP1NB	mature T-cell proliferation 1 neighbor; mature T-cell proliferation 1	Xq28	100272147 4515
33877_s_at	MTDH	metadherin	8q22.1	92140
673_at, 674_g_at	mthfd1	methylenetetrahydrofolate dehydrogenase (NADP+ dependent) 1, methenyltetrahydrofolate cyclohydrolase, formyltetrahydrofolate synthetase	14q24	4522	Abruptio placentae, susceptibility to,Spina bifida, folate-sensitive, susceptibility to,	hsa00630:Glyoxylate and dicarboxylate metabolism,hsa00670:One carbon pool by folate,
40074_at	mthfd2	methylenetetrahydrofolate dehydrogenase (NADP+ dependent) 2, methenyltetrahydrofolate cyclohydrolase	2p13.1	10797		hsa00630:Glyoxylate and dicarboxylate metabolism,hsa00670:One carbon pool by folate,
31836_at	MTIF2	mitochondrial translational initiation factor 2	2p14-p16	4528
36692_at	Mtmr9	myotubularin related protein 9	8p23-p22	66036
31883_at	MTRR	5-methyltetrahydrofolate-homocysteine methyltransferase reductase	5p15.3-p15.2	4552	Homocystinuria-megaloblastic anemia, cbl E type,Neural tube defects, folate-sensitive, susceptibility to,
38013_at	MTUS1	mitochondrial tumor suppressor 1	8p22	57509
35642_at	MTX2	metaxin 2	2q31.1	10651
34410_at	MVD	mevalonate (diphospho) decarboxylase	16q24.3	4597		hsa00900:Terpenoid backbone biosynthesis,
38064_at	MVP	major vault protein	16p13.1-p11.2	9961
37014_at	mx1	myxovirus (influenza virus) resistance 1, interferon-inducible protein p78 (mouse)	21q22.3	4599
41273_at	mxra7	matrix-remodelling associated 7	17q25.1-q25.2	439921
1854_at	MYBL2	v-myb myeloblastosis viral oncogene homolog (avian)-like 2	20q13.1	4605
37724_at, 1973_s_at, 1936_s_at	MYC	v-myc myelocytomatosis viral oncogene homolog (avian)	8q24.21	4609	Burkitt lymphoma,Sequence variant on 8q24 confers susceptibility to urinary bladder cancer,	hsa04010:MAPK signaling pathway,hsa04012:ErbB signaling pathway,hsa04110:Cell cycle,hsa04310:Wnt signaling pathway,hsa04350:TGF-beta signaling pathway,hsa04630:Jak-STAT signaling pathway,hsa05200:Pathways in cancer,hsa05210:Colorectal cancer,hsa05213:Endometrial cancer,hsa05216:Thyroid cancer,hsa05219:Bladder cancer,hsa05220:Chronic myeloid leukemia,hsa05221:Acute myeloid leukemia,hsa05222:Small …
32838_at	myh10	myosin, heavy chain 10, non-muscle	17p13	4628		hsa04530:Tight junction,hsa04810:Regulation of actin cytoskeleton,hsa05416:Viral myocarditis,
39738_at	MYH9	myosin, heavy chain 9, non-muscle	22q13.1	4627	Deafness, autosomal dominant 17,Epstein syndrome,Fechtner syndrome,Macrothrombocytopenia and progressive sensorineural deafness,May-Hegglin anomaly,Sebastian syndrome,	hsa04530:Tight junction,hsa04810:Regulation of actin cytoskeleton,hsa05416:Viral myocarditis,
33447_at	MYL12A	myosin, light chain 12A, regulatory, non-sarcomeric	18p11.31	10627		hsa04510:Focal adhesion,hsa04530:Tight junction,hsa04670:Leukocyte transendothelial migration,hsa04810:Regulation of actin cytoskeleton,
41187_at	MYL12B	myosin, light chain 12B, regulatory	18p11.31	103910		hsa04510:Focal adhesion,hsa04530:Tight junction,hsa04670:Leukocyte transendothelial migration,hsa04810:Regulation of actin cytoskeleton,
35362_at	Myo10	myosin X	5p15.1-p14.3	4651		hsa04666:Fc gamma R-mediated phagocytosis,
41439_at	MYO1B	myosin IB	2q12-q34	4430
40571_at	MYO5A	myosin VA (heavy chain 12, myoxin)	15q21	4644	Griscelli syndrome, type 1,
34678_at	Myof	myoferlin	10q24	26509
31873_at	NAA10	ARD1 homolog A, N-acetyltransferase (S. cerevisiae)	Xq28	8260		hsa00350:Tyrosine metabolism,hsa00360:Phenylalanine metabolism,hsa00564:Glycerophospholipid metabolism,hsa00903:Limonene and pinene degradation,
38692_at	NAB1	NGFI-A binding protein 1 (EGR1 binding protein 1)	2q32.3-q33	4664
35364_at	Nae1	NEDD8 activating enzyme E1 subunit 1	16q22	8883		hsa05010:Alzheimer's disease,
34099_f_at, 40634_at, 571_at	NAP1L1	nucleosome assembly protein 1-like 1	12q21.2	4673
41241_at	Nars	asparaginyl-tRNA synthetase	18q21.2-q21.3	4677		hsa00970:Aminoacyl-tRNA biosynthesis,
33255_at	NASP	nuclear autoantigenic sperm protein (histone-binding)	1p34.1	4678
38187_at	NAT1	N-acetyltransferase 1 (arylamine N-acetyltransferase)	8p22 8p23.1-p21.3	9		hsa00232:Caffeine metabolism,hsa00983:Drug metabolism,
35153_at	NBN	nibrin	8q21	4683	Leukemia, acute lymphoblastic,Nijmegen breakage syndrome,	hsa03440:Homologous recombination,
35314_at	NCAPD2	non-SMC condensin I complex, subunit D2	12p13.3	9918
32790_at, 32789_at	NCBP2	nuclear cap binding protein subunit 2, 20kDa	3q29	22916		hsa03040:Spliceosome,
32590_at	ncl	nucleolin	2q12-qter	4691		hsa05130:Pathogenic Escherichia coli infection,
34171_at	ncln	nicalin homolog (zebrafish)	19p13.3	56926
39358_at	ncor2	nuclear receptor co-repressor 2	12q24	9612		hsa04330:Notch signaling pathway,
40041_at	NDC80	NDC80 homolog, kinetochore complex component (S. cerevisiae)	18p11.32	10403
36169_at	NDUFA1	NADH dehydrogenase (ubiquinone) 1 alpha subcomplex, 1, 7.5kDa	Xq24	4694	Mitochondrial complex I deficiency,	hsa00190:Oxidative phosphorylation,hsa05010:Alzheimer's disease,hsa05012:Parkinson's disease,hsa05016:Huntington's disease,
38462_at	NDUFA5	NADH dehydrogenase (ubiquinone) 1 alpha subcomplex, 5, 13kDa	7q32	4698		hsa00190:Oxidative phosphorylation,hsa05010:Alzheimer's disease,hsa05012:Parkinson's disease,hsa05016:Huntington's disease,
35297_at	NDUFAB1	NADH dehydrogenase (ubiquinone) 1, alpha/beta subcomplex, 1, 8kDa	16p12.1	4706	Genome-wide association study of 14,000 cases of seven common diseases and 3,000 shared controls,	hsa00190:Oxidative phosphorylation,hsa05010:Alzheimer's disease,hsa05012:Parkinson's disease,hsa05016:Huntington's disease,
34347_at	NDUFAF3	NADH dehydrogenase (ubiquinone) 1 alpha subcomplex, assembly factor 3	3p21.31	25915
38485_at	NDUFC1	NADH dehydrogenase (ubiquinone) 1, subcomplex unknown, 1, 6kDa	4q28.2-q31.1	4717		hsa00190:Oxidative phosphorylation,hsa05010:Alzheimer's disease,hsa05012:Parkinson's disease,hsa05016:Huntington's disease,
38395_at	NDUFS1	NADH dehydrogenase (ubiquinone) Fe-S protein 1, 75kDa (NADH-coenzyme Q reductase)	2q33-q34	4719	Mitochondrial complex I deficiency,	hsa00190:Oxidative phosphorylation,hsa05010:Alzheimer's disease,hsa05012:Parkinson's disease,hsa05016:Huntington's disease,
32738_at	ndufs2	NADH dehydrogenase (ubiquinone) Fe-S protein 2, 49kDa (NADH-coenzyme Q reductase)	1q23	4720	Mitochondrial complex I deficiency,	hsa00190:Oxidative phosphorylation,hsa05010:Alzheimer's disease,hsa05012:Parkinson's disease,hsa05016:Huntington's disease,
38695_at	NDUFS4	NADH dehydrogenase (ubiquinone) Fe-S protein 4, 18kDa (NADH-coenzyme Q reductase)	5q11.1	4724	Leigh syndrome,Mitochondrial complex I deficiency,	hsa00190:Oxidative phosphorylation,hsa05010:Alzheimer's disease,hsa05012:Parkinson's disease,hsa05016:Huntington's disease,
34865_at	NDUFS6	NADH dehydrogenase (ubiquinone) Fe-S protein 6, 13kDa (NADH-coenzyme Q reductase)	5p15.33	4726	Complex I, mitochondrial respiratory chain, deficiency of,	hsa00190:Oxidative phosphorylation,hsa05010:Alzheimer's disease,hsa05012:Parkinson's disease,hsa05016:Huntington's disease,
37329_at	Ndufv1	NADH dehydrogenase (ubiquinone) flavoprotein 1, 51kDa	11q13	4723	Alexander disease,Leigh syndrome,Mitochondrial complex I deficiency,	hsa00190:Oxidative phosphorylation,hsa05010:Alzheimer's disease,hsa05012:Parkinson's disease,hsa05016:Huntington's disease,
34893_at	Ndufv2	NADH dehydrogenase (ubiquinone) flavoprotein 2, 24kDa	18p11.31-p11.2	4729	Parkinson disease, susceptibility to,	hsa00190:Oxidative phosphorylation,hsa05010:Alzheimer's disease,hsa05012:Parkinson's disease,hsa05016:Huntington's disease,
32078_at	NEDD4	neural precursor cell expressed, developmentally down-regulated 4	15q	4734		hsa04120:Ubiquitin mediated proteolysis,hsa04144:Endocytosis,
38007_at	Nf2	neurofibromin 2 (merlin)	22q12.2	4771	Meningioma, NF2-related, somatic,Neurofibromatosis, type 2,Schwannomatosis,
38864_at	NFATC2IP	nuclear factor of activated T-cells, cytoplasmic, calcineurin-dependent 2 interacting protein	16p11.2	84901
38439_at	NFE2L1	nuclear factor (erythroid-derived 2)-like 1	17q21.3	4779
41229_at	NFIB	nuclear factor I/B	9p24.1	4781
1377_at	NFKB1	nuclear factor of kappa light polypeptide gene enhancer in B-cells 1	4q24	4790		hsa04010:MAPK signaling pathway,hsa04062:Chemokine signaling pathway,hsa04210:Apoptosis,hsa04620:Toll-like receptor signaling pathway,hsa04621:NOD-like receptor signaling pathway,hsa04622:RIG-I-like receptor signaling pathway,hsa04623:Cytosolic DNA-sensing pathway,hsa04660:T cell receptor signaling pathway,hsa04662:B cell receptor signaling pathway,hsa04722:Neurotrophin signaling pathway,hsa04920…
41322_s_at	NHP2	NHP2 ribonucleoprotein homolog (yeast)	5q35.3	55651
35366_at	nid1	nidogen 1	1q43	4811
40866_at	NIPSNAP1	nipsnap homolog 1 (C. elegans)	22q12.2	8508
1980_s_at, 1521_at, 33415_at, 1985_s_at, 39073_at	Nme1 NME1-NME2 NME2	non-metastatic cells 1, protein (NM23A) expressed in; NME1-NME2 readthrough transcript; non-metastatic cells 2, protein (NM23B) expressed in	17q21.3	4830 4831 654364	Neuroblastoma,	hsa00230:Purine metabolism,hsa00240:Pyrimidine metabolism,
39089_at	NME4	non-metastatic cells 4, protein expressed in	16p13.3	4833		hsa00230:Purine metabolism,hsa00240:Pyrimidine metabolism,
36472_at	nmi	N-myc (and STAT) interactor	2q23	9111
38999_s_at	NMT1	N-myristoyltransferase 1	17q21.31	4836
41722_at	Nnt	nicotinamide nucleotide transhydrogenase	5p13.1-cen	23530		hsa00760:Nicotinate and nicotinamide metabolism,
36597_at	NOLC1	nucleolar and coiled-body phosphoprotein 1	10q24.32	9221
38527_at	nonO	non-POU domain containing, octamer-binding	Xq13.1	4841
41259_at	NOP16	NOP16 nucleolar protein homolog (yeast)	5q35.2	51491
1979_s_at	nop2	NOP2 nucleolar protein homolog (yeast)	12p13	4839
34882_at	Nop56	NOP56 ribonucleoprotein homolog (yeast)	20p13	10528
39345_at	npc2	Niemann-Pick disease, type C2	14q24.3	10577	Niemann-pick disease, type C2,
40756_at	NPM3	nucleophosmin/nucleoplasmin, 3	10q24.31	10360
40497_at	NPRL2	tumor suppressor candidate 4	3p21.3	10641
35747_at	NPTN	neuroplastin	15q22	27020
38066_at	nqo1	NAD(P)H dehydrogenase, quinone 1	16q22.1	1728	Benzene toxicity, susceptibility to,Breast cancer, poor survival after chemotherapy for,Leukemia, post-chemotherapy, susceptibility to,
1539_at	NRAS	neuroblastoma RAS viral (v-ras) oncogene homolog	11p15.5 1p13.2	4893	Autoimmune lymphoproliferative syndrome type IV,Colorectal cancer,Thyroid carcinoma, follicular,	hsa04010:MAPK signaling pathway,hsa04012:ErbB signaling pathway,hsa04062:Chemokine signaling pathway,hsa04360:Axon guidance,hsa04370:VEGF signaling pathway,hsa04530:Tight junction,hsa04540:Gap junction,hsa04650:Natural killer cell mediated cytotoxicity,hsa04660:T cell receptor signaling pathway,hsa04662:B cell receptor signaling pathway,hsa04664:Fc epsilon RI signaling pathway,hsa04720:Long-term …
37286_at	nrcam	neuronal cell adhesion molecule	7q31.1-q31.2	4897		hsa04514:Cell adhesion molecules (CAMs),
32719_at, 1148_s_at	NRG1	neuregulin 1	8p12	3084	?Schizophrenia, susceptibility to,Genome-wide association with bone mass and geometry in the Framingham Heart Study,	hsa04012:ErbB signaling pathway,
41335_at	NSL1	NSL1, MIND kinetochore complex component, homolog (S. cerevisiae)	1q41	25936
37673_at	NSMAF	neutral sphingomyelinase (N-SMase) activation associated factor	8q12-q13	8439
41258_at	NSUN5P1	NOL1/NOP2/Sun domain family, member 5B	7q11.23	155400
31886_at	NT5E	5'-nucleotidase, ecto (CD73)	6q14-q21	4907		hsa00230:Purine metabolism,hsa00240:Pyrimidine metabolism,hsa00760:Nicotinate and nicotinamide metabolism,
35080_at	Ntsr1	neurotensin receptor 1 (high affinity)	20q13	4923		hsa04020:Calcium signaling pathway,hsa04080:Neuroactive ligand-receptor interaction,
35836_at	nudC	nuclear distribution gene C homolog (A. nidulans)	1p35-p34	10726
35723_at	Nudt1	nudix (nucleoside diphosphate linked moiety X)-type motif 1	7p22	4521
39142_at	NUDT21	nudix (nucleoside diphosphate linked moiety X)-type motif 21	16q13	11051
39390_at	NUP133	nucleoporin 133kDa	1q42.13	55746
34659_at	NUP155	nucleoporin 155kDa	5p13.1	9631
34253_at	NUP160	nucleoporin 160kDa	11p11.2	23279
38728_at	NUP205	nucleoporin 205kDa	7q33	23165
40584_at	Nup88	nucleoporin 88kDa	17p13.2	4927
40271_at	NUP93	nucleoporin 93kDa	16q13	9688
36636_at	OAT	ornithine aminotransferase (gyrate atrophy)	10q26	4942	Gyrate atrophy of choroid and retina with ornithinemia, B6 responsive or unresponsive,	hsa00330:Arginine and proline metabolism,
34169_s_at	OCRL	oculocerebrorenal syndrome of Lowe	Xq25-q26.1	4952	Dent disease 2,Dent syndrome,Lowe syndrome,	hsa00562:Inositol phosphate metabolism,hsa04070:Phosphatidylinositol signaling system,
36203_at, 1081_at	ODC1	ornithine decarboxylase 1	2p25	4953	Colonic adenoma recurrence, reduced risk of,	hsa00330:Arginine and proline metabolism,hsa00480:Glutathione metabolism,
37474_at	Oip5	Opa interacting protein 5	15q15.1	11339
41744_at, 41743_i_at, 41742_s_at	OPTN	optineurin	10p13	10133	Glaucoma 1, open angle, E,Glaucoma, normal tension, susceptibility to,
39943_at	ORC2L	origin recognition complex, subunit 2-like (yeast)	2q33	4999		hsa04110:Cell cycle,
36895_at	orc3l	origin recognition complex, subunit 3-like (yeast)	6q14.3-q16.1	23595		hsa04110:Cell cycle,
39774_at	Oxa1l	oxidase (cytochrome c) assembly 1-like	14q11.2	5018		hsa03060:Protein export,
41142_at	oxct1	3-oxoacid CoA transferase 1	5p13.1	5019	Succinyl CoA:3-oxoacid CoA transferase deficiency,	hsa00072:Synthesis and degradation of ketone bodies,hsa00280:Valine, leucine and isoleucine degradation,hsa00650:Butanoate metabolism,
37037_at	P4HA1	prolyl 4-hydroxylase, alpha polypeptide I	10q21.3-q23.1	5033		hsa00330:Arginine and proline metabolism,
34390_at	P4HA2	prolyl 4-hydroxylase, alpha polypeptide II	5q31	8974		hsa00330:Arginine and proline metabolism,
41600_at	PA2G4 PA2G4P4	proliferation-associated 2G4, 38kDa; proliferation-associated 2G4 pseudogene 4	12q13.2 3q25.31	5036 647033
40506_s_at	PABPC4	poly(A) binding protein, cytoplasmic 4 (inducible form)	1p32-p36	8761
35800_at	PAFAH1B3	platelet-activating factor acetylhydrolase, isoform Ib, subunit 3 (29kDa)	19q13.1	5050		hsa00565:Ether lipid metabolism,
39056_at	paics	phosphoribosylaminoimidazole carboxylase, phosphoribosylaminoimidazole succinocarboxamide synthetase	4q12	10606		hsa00230:Purine metabolism,
1560_g_at, 34329_at	Pak2	p21 protein (Cdc42/Rac)-activated kinase 2	3q29	5062		hsa04010:MAPK signaling pathway,hsa04012:ErbB signaling pathway,hsa04360:Axon guidance,hsa04510:Focal adhesion,hsa04660:T cell receptor signaling pathway,hsa04810:Regulation of actin cytoskeleton,hsa05211:Renal cell carcinoma,
41191_at	palld	palladin, cytoskeletal associated protein	4q32.3	23022	Pancreatic cancer, 1,Pancreatic cancer, susceptibility to, 1,Whole genome association study identifies polymorphisms associated with QT prolongation during iloperidone treatment of schizophrenia,
35623_at	PANX1	pannexin 1	11q21	24145
34411_at	papss1	3'-phosphoadenosine 5'-phosphosulfate synthase 1	4q24	9061		hsa00230:Purine metabolism,hsa00450:Selenoamino acid metabolism,hsa00920:Sulfur metabolism,
38974_at	PARK7	Parkinson disease (autosomal recessive, early onset) 7	1p36.23	11315	Amyotrophic lateral sclerosis-Parkinsonism/dementia complex 2,Parkinson disease 7, autosomal recessive early-onset,	hsa05012:Parkinson's disease,
41146_at, 1287_at	parp1	poly (ADP-ribose) polymerase 1	1q41-q42	142		hsa03410:Base excision repair,
34756_g_at, 34755_at	PARP2	poly (ADP-ribose) polymerase 2	14q11.2-q12	10038		hsa03410:Base excision repair,
37303_at	PARP4	poly (ADP-ribose) polymerase family, member 4	13q11	143		hsa03410:Base excision repair,
38000_at	Pc	pyruvate carboxylase	11q13.4-q13.5	5091	Pyruvate carboxylase deficiency,	hsa00020:Citrate cycle (TCA cycle),hsa00620:Pyruvate metabolism,
34352_at	Pcbd1	pterin-4 alpha-carbinolamine dehydratase/dimerization cofactor of hepatocyte nuclear factor 1 alpha	10q22	5092	Hyperphenylalaninemia due to pterin-4a-carbinolamine dehydratase deficiency,Hyperphenylalaninemia, BH4-deficient, D,
36561_at	PCCB	propionyl Coenzyme A carboxylase, beta polypeptide	3q21-q22	5096	Propionicacidemia,	hsa00280:Valine, leucine and isoleucine degradation,hsa00640:Propanoate metabolism,
41534_at	PCDH7	protocadherin 7	4p15	5099
37188_at	pck2	phosphoenolpyruvate carboxykinase 2 (mitochondrial)	14q12	5106	PEPCK deficiency, mitochondrial,	hsa00010:Glycolysis / Gluconeogenesis,hsa00020:Citrate cycle (TCA cycle),hsa00620:Pyruvate metabolism,hsa03320:PPAR signaling pathway,hsa04910:Insulin signaling pathway,hsa04920:Adipocytokine signaling pathway,
37737_at, 37738_g_at, 37736_at	pcmt1	protein-L-isoaspartate (D-aspartate) O-methyltransferase	6q24-q25	5110
1824_s_at, 1884_s_at	pcnA	proliferating cell nuclear antigen	20pter-p12	5111		hsa03030:DNA replication,hsa03410:Base excision repair,hsa03420:Nucleotide excision repair,hsa03430:Mismatch repair,hsa04110:Cell cycle,
37676_at	PDE8A	phosphodiesterase 8A	15q25.3	5151		hsa00230:Purine metabolism,
35703_at	PDGFA	platelet-derived growth factor alpha polypeptide	7p22	5154		hsa04010:MAPK signaling pathway,hsa04060:Cytokine-cytokine receptor interaction,hsa04510:Focal adhesion,hsa04540:Gap junction,hsa04810:Regulation of actin cytoskeleton,hsa05200:Pathways in cancer,hsa05214:Glioma,hsa05215:Prostate cancer,hsa05218:Melanoma,
38986_at	PDIA3	protein disulfide isomerase family A, member 3	15q15	2923		hsa04612:Antigen processing and presentation,
39113_at	Pdia4	protein disulfide isomerase family A, member 4	7q35	9601		hsa05110:Vibrio cholerae infection,
37044_at	PDIA5	protein disulfide isomerase family A, member 5	3q21.1	10954
41750_at	pdia6	protein disulfide isomerase family A, member 6	2p25.1	10130
36937_s_at	PDLIM1	PDZ and LIM domain 1	10q22-q26.3	9124
32610_at	PDLIM4	PDZ and LIM domain 4	5q31.1	8572	Osteoporosis, susceptibility to,
40060_r_at	PDLIM5	PDZ and LIM domain 5	4q22	10611
41871_at, 41870_at	PDPN	podoplanin	1p36.21	10630
34353_at	PDS5A	PDS5, regulator of cohesion maintenance, homolog A (S. cerevisiae)	4p14	23244
39696_at	PEG10	paternally expressed 10	7q21	23089
41869_at	PES1	pescadillo homolog 1, containing BRCT domain (zebrafish)	22q12.1	23481
37900_at	PEX11B	peroxisomal biogenesis factor 11 beta	1q21.1	8799
33265_at	PEX2	peroxisomal membrane protein 3, 35kDa	8q21.1	5828	Many sequence variants affecting diversity of adult human height,Refsum disease, infantile form,Zellweger syndrome-3,
36196_at	PFKM	phosphofructokinase, muscle	12q13.3	5213	Glycogen storage disease VII,	hsa00010:Glycolysis / Gluconeogenesis,hsa00030:Pentose phosphate pathway,hsa00051:Fructose and mannose metabolism,hsa00052:Galactose metabolism,
39175_at	pfkp	phosphofructokinase, platelet	10p15.3-p15.2	5214		hsa00010:Glycolysis / Gluconeogenesis,hsa00030:Pentose phosphate pathway,hsa00051:Fructose and mannose metabolism,hsa00052:Galactose metabolism,
36675_r_at	pfn1	profilin 1	17p13.3	5216		hsa04810:Regulation of actin cytoskeleton,
38840_s_at, 38839_at	pfn2	profilin 2	3q25.1 3q25.1-q25.2	5217		hsa04810:Regulation of actin cytoskeleton,
39324_at	PGAP1	post-GPI attachment to proteins 1	2q33.1	80055		hsa00563:Glycosylphosphatidylinositol(GPI)-anchor biosynthesis,
36963_at	PGD	phosphogluconate dehydrogenase	1p36.3-p36.13	5226		hsa00030:Pentose phosphate pathway,hsa00480:Glutathione metabolism,
31488_s_at, 37677_at	PGK1	phosphoglycerate kinase 1	Xq13	5230	Myoglobinuria/hemolysis due to PGK deficiency,Phosphoglycerate kinase 1 deficiency,	hsa00010:Glycolysis / Gluconeogenesis,
32210_at	pgm1	phosphoglucomutase 1	1p31	5236		hsa00010:Glycolysis / Gluconeogenesis,hsa00030:Pentose phosphate pathway,hsa00052:Galactose metabolism,hsa00500:Starch and sucrose metabolism,hsa00520:Amino sugar and nucleotide sugar metabolism,
39267_at	Pgm3	phosphoglucomutase 3	6q14.1-q15	5238		hsa00520:Amino sugar and nucleotide sugar metabolism,
37364_at	PHB2	prohibitin 2	12p13	11331
36960_at	PHC2	polyhomeotic homolog 2 (Drosophila)	1p34.3	1912
37694_at	PHF3	PHD finger protein 3	6q12	23469
37392_at	Phkb	phosphorylase kinase, beta	16q12-q13	5257	Phosphorylase kinase deficiency of liver and muscle, autosomal recessive,	hsa04020:Calcium signaling pathway,hsa04910:Insulin signaling pathway,
35909_at	phlda1	pleckstrin homology-like domain, family A, member 1	12q15	22822
36012_at	pibf1	progesterone immunomodulatory binding factor 1	13q22.1	10464
40629_at	PIGH	phosphatidylinositol glycan anchor biosynthesis, class H	14q11-q24	5283		hsa00563:Glycosylphosphatidylinositol(GPI)-anchor biosynthesis,
40421_at	PIN1	peptidylprolyl cis/trans isomerase, NIMA-interacting 1	19p13	5300		hsa04622:RIG-I-like receptor signaling pathway,
35741_at	PIP4K2B	phosphatidylinositol-5-phosphate 4-kinase, type II, beta	17q12	8396		hsa00562:Inositol phosphate metabolism,hsa04070:Phosphatidylinositol signaling system,hsa04144:Endocytosis,hsa04666:Fc gamma R-mediated phagocytosis,hsa04810:Regulation of actin cytoskeleton,
33340_at	pja2	praja ring finger 2	5q21.3	9867
38120_at	Pkd2	polycystic kidney disease 2 (autosomal dominant)	4q21-q23	5311	Polycystic kidney disease, adult, type II,
33892_at	Pkp2	plakophilin 2	12p11	5318	Arrhythmogenic right ventricular dysplasia, familial, 9,	hsa05412:Arrhythmogenic right ventricular cardiomyopathy (ARVC),
35938_at	pla2g4a	phospholipase A2, group IVA (cytosolic, calcium-dependent)	1q25	5321	Genome-wide Association Scan Identifies a Prostaglandin-Endoperoxide Synthase 2 Variant Involved in Risk of Knee Osteoarthritis,Phospholipase A2, group IV A, deficiency of,	hsa00564:Glycerophospholipid metabolism,hsa00565:Ether lipid metabolism,hsa00590:Arachidonic acid metabolism,hsa00591:Linoleic acid metabolism,hsa00592:alpha-Linolenic acid metabolism,hsa04010:MAPK signaling pathway,hsa04270:Vascular smooth muscle contraction,hsa04370:VEGF signaling pathway,hsa04664:Fc epsilon RI signaling pathway,hsa04666:Fc gamma R-mediated phagocytosis,hsa04730:Long-term depre…
37068_at	PLA2G7	phospholipase A2, group VII (platelet-activating factor acetylhydrolase, plasma)	6p21.2-p12	7941	Asthma, susceptibility to,Atopy, susceptibility to,Platelet-activating factor acetylhydrolase deficiency,	hsa00565:Ether lipid metabolism,
37310_at	PLAU	plasminogen activator, urokinase	10q24	5328	Alzheimer disease, late-onset, susceptibility to,	hsa04610:Complement and coagulation cascades,
364_s_at	plcb3	phospholipase C, beta 3 (phosphatidylinositol-specific)	11q13	5331		hsa00562:Inositol phosphate metabolism,hsa04020:Calcium signaling pathway,hsa04062:Chemokine signaling pathway,hsa04070:Phosphatidylinositol signaling system,hsa04270:Vascular smooth muscle contraction,hsa04310:Wnt signaling pathway,hsa04540:Gap junction,hsa04720:Long-term potentiation,hsa04730:Long-term depression,hsa04912:GnRH signaling pathway,hsa04916:Melanogenesis,hsa05010:Alzheimer's diseas…
35454_at	PLCH2	phospholipase C, eta 2	1p36.32	9651
975_at	PLK4	polo-like kinase 4 (Drosophila)	4q28	10733
34795_at	PLOD2	procollagen-lysine, 2-oxoglutarate 5-dioxygenase 2	3q23-q24	5352	Bruck syndrome 2,	hsa00310:Lysine degradation,
39801_at	Plod3	procollagen-lysine, 2-oxoglutarate 5-dioxygenase 3	7q22	8985	Lysyl hydroxylase 3 deficiency,	hsa00310:Lysine degradation,
37326_at	PLP2	proteolipid protein 2 (colonic epithelium-enriched)	Xp11.23	5355
39951_at	PLS1	plastin 1 (I isoform)	3q23	5357
32775_r_at	plscr1	phospholipid scramblase 1	3q23	5359
38653_at	pmp22	peripheral myelin protein 22	17p12-p11.2	5376	Charcot-Marie-Tooth disease, type 1A,Charcot-Marie-Tooth disease, type 1E,Dejerine-Sottas disease,Neuropathy, recurrent, with pressure palsies,Roussy-Levy syndrome,
41461_at, 525_g_at	Pms1	PMS1 postmeiotic segregation increased 1 (S. cerevisiae)	2q31-q33 2q31-q33|2q31.1	5378	Colorectal cancer, hereditary nonpolyposis, type 3,
33720_at	pno1	partner of NOB1 homolog (S. cerevisiae)	2p14	56902
40434_at	PODXL	podocalyxin-like	7q32-q33	5420
1470_at	Pold2	polymerase (DNA directed), delta 2, regulatory subunit 50kDa	7p13	5425		hsa00230:Purine metabolism,hsa00240:Pyrimidine metabolism,hsa03030:DNA replication,hsa03410:Base excision repair,hsa03420:Nucleotide excision repair,hsa03430:Mismatch repair,hsa03440:Homologous recombination,
38702_at	POLE3	polymerase (DNA directed), epsilon 3 (p17 subunit)	9q33	54107		hsa00230:Purine metabolism,hsa00240:Pyrimidine metabolism,hsa03030:DNA replication,hsa03410:Base excision repair,hsa03420:Nucleotide excision repair,
36460_at	Polr1c	polymerase (RNA) I polypeptide C, 30kDa	6p21.1	9533		hsa00230:Purine metabolism,hsa00240:Pyrimidine metabolism,hsa03020:RNA polymerase,hsa04623:Cytosolic DNA-sensing pathway,
33726_at	Polr2d	polymerase (RNA) II (DNA directed) polypeptide D	2q21	5433		hsa00230:Purine metabolism,hsa00240:Pyrimidine metabolism,hsa03020:RNA polymerase,hsa05016:Huntington's disease,
39747_at	POLR2G	polymerase (RNA) II (DNA directed) polypeptide G	11q13.1	5436		hsa00230:Purine metabolism,hsa00240:Pyrimidine metabolism,hsa03020:RNA polymerase,hsa05016:Huntington's disease,
1248_at, 35631_at	POLR2H	polymerase (RNA) II (DNA directed) polypeptide H	3q28	5437		hsa00230:Purine metabolism,hsa00240:Pyrimidine metabolism,hsa03020:RNA polymerase,hsa05016:Huntington's disease,
31571_at	POLR3G	polymerase (RNA) III (DNA directed) polypeptide G (32kD)	5q14.3	10622		hsa00230:Purine metabolism,hsa00240:Pyrimidine metabolism,hsa03020:RNA polymerase,hsa04623:Cytosolic DNA-sensing pathway,
40504_at	PON2	paraoxonase 2	7q21.3	5445	Coronary artery disease, susceptibility to,
39516_at	pop5	processing of precursor 5, ribonuclease P/MRP subunit (S. cerevisiae)	12q24.31	51367
1451_s_at	postn	periostin, osteoblast specific factor	13q13.3	10631
35823_at	ppiB	peptidylprolyl isomerase B (cyclophilin B)	15q21-q22	5479
948_s_at	ppiD	peptidylprolyl isomerase D	4q31.3	5481		hsa04020:Calcium signaling pathway,hsa05012:Parkinson's disease,hsa05016:Huntington's disease,
34366_g_at	ppie	peptidylprolyl isomerase E (cyclophilin E)	1p32	10450		hsa03040:Spliceosome,
38352_at	Ppih	peptidylprolyl isomerase H (cyclophilin H)	1p34.1	10465		hsa03040:Spliceosome,
35167_at	ppip5k2	histidine acid phosphatase domain containing 1	5q21.1	23262
41162_at	Ppm1g	protein phosphatase 1G (formerly 2C), magnesium-dependent, gamma isoform	2p23.3	5496
39127_f_at	ppp2r4	protein phosphatase 2A activator, regulatory subunit 4	9q34	5524
32734_at	PPP2R5E	protein phosphatase 2, regulatory subunit B', epsilon isoform	14q23.1	5529		hsa04114:Oocyte meiosis,hsa04310:Wnt signaling pathway,
39780_at	PPP3CB	protein phosphatase 3 (formerly 2B), catalytic subunit, beta isoform	10q21-q22	5532		hsa04010:MAPK signaling pathway,hsa04020:Calcium signaling pathway,hsa04114:Oocyte meiosis,hsa04210:Apoptosis,hsa04310:Wnt signaling pathway,hsa04360:Axon guidance,hsa04370:VEGF signaling pathway,hsa04650:Natural killer cell mediated cytotoxicity,hsa04660:T cell receptor signaling pathway,hsa04662:B cell receptor signaling pathway,hsa04720:Long-term potentiation,hsa05010:Alzheimer's disease,hsa05…
34774_at	PPT1	palmitoyl-protein thioesterase 1	1p32	5538	Ceroid lipofuscinosis, neuronal, variant juvenile type, with granular osmiophilic deposits,Ceroid lipofuscinosis, neuronal-1, infantile,	hsa00062:Fatty acid elongation in mitochondria,hsa04142:Lysosome,
34325_at	PQBP1	polyglutamine binding protein 1	Xp11.23	10084	Golabi-Ito-Hall syndrome,Renpenning syndrome,	hsa03040:Spliceosome,
36631_at	prdx3	peroxiredoxin 3	10q25-q26	10935
38435_at	Prdx4	peroxiredoxin 4	Xp22.11	10549
36898_r_at	PRIM2	primase, DNA, polypeptide 2 (58kDa)	6p12-p11.1	5558		hsa00230:Purine metabolism,hsa00240:Pyrimidine metabolism,hsa03030:DNA replication,
36215_at	PRKACB	protein kinase, cAMP-dependent, catalytic, beta	1p36.1	5567		hsa04010:MAPK signaling pathway,hsa04020:Calcium signaling pathway,hsa04062:Chemokine signaling pathway,hsa04114:Oocyte meiosis,hsa04210:Apoptosis,hsa04270:Vascular smooth muscle contraction,hsa04310:Wnt signaling pathway,hsa04340:Hedgehog signaling pathway,hsa04540:Gap junction,hsa04720:Long-term potentiation,hsa04740:Olfactory transduction,hsa04742:Taste transduction,hsa04910:Insulin signaling …
41768_at, 227_g_at, 226_at	PRKAR1A	protein kinase, cAMP-dependent, regulatory, type I, alpha (tissue specific extinguisher 1)	17q23-q24	5573	Adrenocortical tumor, somatic,Carney complex, type 1,Myxoma, intracardiac,Pigmented adrenocortical disease, primary, 1,Thyroid carcinoma, papillary,	hsa04210:Apoptosis,hsa04910:Insulin signaling pathway,
39711_at	prkcsh	protein kinase C substrate 80K-H	19p13.2	5589	Polycystic liver disease,
41141_at	PRKRIR	protein-kinase, interferon-inducible double stranded RNA dependent inhibitor, repressor of (P58 repressor)	11q13.5	5612
32825_at	PRMT1	protein arginine methyltransferase 1	19q13.3	3276
39348_at	PRMT2	protein arginine methyltransferase 2	21q22.3	3275
34998_at	PRMT3	protein arginine methyltransferase 3	11p15.1	10196
36159_s_at	PRNP	prion protein	20p13	5621	Creutzfeldt-Jakob disease,Gerstmann-Straussler disease,Huntington disease-like 1,Insomnia, fatal familial,Prion disease with protracted course,	hsa05020:Prion diseases,
647_at	Procr	protein C receptor, endothelial (EPCR)	20q11.2	10544
40424_at	PROSC	proline synthetase co-transcribed homolog (bacterial)	8p11.2	11212
33230_at	prpf19	PRP19/PSO4 pre-mRNA processing factor 19 homolog (S. cerevisiae)	11q12.2	27339		hsa03040:Spliceosome,hsa04120:Ubiquitin mediated proteolysis,
39053_at	PRPF3	PRP3 pre-mRNA processing factor 3 homolog (S. cerevisiae)	1q21.1	9129	Retinitis pigmentosa-18,	hsa03040:Spliceosome,
37935_at, 37936_at	PRPF4	PRP4 pre-mRNA processing factor 4 homolog (yeast)	9q31-q33	9128		hsa03040:Spliceosome,
37506_at	Prpf40a	PRP40 pre-mRNA processing factor 40 homolog A (S. cerevisiae)	2q23.3	55660		hsa03040:Spliceosome,
36489_at	PRPS1 Prps1l1	phosphoribosyl pyrophosphate synthetase 1; phosphoribosyl pyrophosphate synthetase 1-like 1	7p21.1 Xq21.32-q24	221823 5631	Arts syndrome,Charcot-Marie-Tooth disease, X-linked recessive, 5,Gout, PRPS-related,Phosphoribosylpyrophosphate synthetase superactivity,	hsa00030:Pentose phosphate pathway,hsa00230:Purine metabolism,
41490_at	prps2	phosphoribosyl pyrophosphate synthetase 2	Xp22.3-p22.2	5634		hsa00030:Pentose phosphate pathway,hsa00230:Purine metabolism,
37338_at	PRPSAP1	phosphoribosyl pyrophosphate synthetase-associated protein 1	17q24-q25	5635
40078_at	prss23	protease, serine, 23	11q14.1	11098
39243_s_at, 37622_r_at	PSIP1	PC4 and SFRS1 interacting protein 1	9p22.3	11168
1446_at	psmA2	proteasome (prosome, macropain) subunit, alpha type, 2	7p13	5683		hsa03050:Proteasome,
1448_at	Psma3	proteasome (prosome, macropain) subunit, alpha type, 3	14q23	5684		hsa03050:Proteasome,
1450_g_at, 1449_at	Psma4	proteasome (prosome, macropain) subunit, alpha type, 4	15q25.1	5685	A susceptibility locus for lung cancer maps to nicotinic acteylcholine receptor subunit genes on 15q25,Familial Aggregation of Common Sequence Variants on 15q24-25.1 in Lung Cancer,Genome-wide association scan of tag SNPs identifies a susceptibility locus for lung cancer at 15q25.1,	hsa03050:Proteasome,
1310_at	psmb2	proteasome (prosome, macropain) subunit, beta type, 2	1p34.2	5690		hsa03050:Proteasome,
1309_at	PSMB3	proteasome (prosome, macropain) subunit, beta type, 3	17q12	5691		hsa03050:Proteasome,
41184_s_at	psmb8	proteasome (prosome, macropain) subunit, beta type, 8 (large multifunctional peptidase 7)	6p21.3	5696		hsa03050:Proteasome,
38287_at	psmb9	proteasome (prosome, macropain) subunit, beta type, 9 (large multifunctional peptidase 2)	6p21.3	5698		hsa03050:Proteasome,
37350_at	PSMD10	proteasome (prosome, macropain) 26S subunit, non-ATPase, 10	Xq22.3	5716
1192_at	PSMD12	proteasome (prosome, macropain) 26S subunit, non-ATPase, 12	17q24.2	5718		hsa03050:Proteasome,
33247_at	PSMD14	proteasome (prosome, macropain) 26S subunit, non-ATPase, 14	2q24.2	10213		hsa03050:Proteasome,
36600_at	PSME1	proteasome (prosome, macropain) activator subunit 1 (PA28 alpha)	14q11.2	5720		hsa03050:Proteasome,hsa04612:Antigen processing and presentation,
41171_at, 1184_at	PSME2	proteasome (prosome, macropain) activator subunit 2 (PA28 beta)	14q11.2	5721		hsa03050:Proteasome,hsa04612:Antigen processing and presentation,
36978_at	Psme4	proteasome (prosome, macropain) activator subunit 4	2p16.2	23198		hsa03050:Proteasome,
36974_at	PSMF1	proteasome (prosome, macropain) inhibitor subunit 1 (PI31)	20p13	9491		hsa03050:Proteasome,
36088_at	PSMG1	proteasome (prosome, macropain) assembly chaperone 1	21q22.3	8624	Loci on 20q13 and 21q22 are associated with pediatric-onset inflammatory bowel disease,
36736_f_at	PSPH PSPHL	phosphoserine phosphatase-like; phosphoserine phosphatase	7p15.2-p15.1 7q11.2	5723 8781	Phosphoserine phosphatase deficiency,	hsa00260:Glycine, serine and threonine metabolism,
37320_at	Ptdss1	phosphatidylserine synthase 1	8q22	9791		hsa00564:Glycerophospholipid metabolism,
32548_at	Ptges3	prostaglandin E synthase 3 (cytosolic)	12q13.3 12q13.3|12	10728
1069_at	PTGS2	prostaglandin-endoperoxide synthase 2 (prostaglandin G/H synthase and cyclooxygenase)	1q25.2-q25.3	5743	Genome-wide Association Scan Identifies a Prostaglandin-Endoperoxide Synthase 2 Variant Involved in Risk of Knee Osteoarthritis,	hsa00590:Arachidonic acid metabolism,hsa04370:VEGF signaling pathway,hsa05200:Pathways in cancer,hsa05222:Small cell lung cancer,
615_s_at, 37989_at	PTHLH	parathyroid hormone-like hormone	12p12.1-p11.2	5744
36117_at	PTK2	PTK2 protein tyrosine kinase 2	8q24-qter	5747		hsa04012:ErbB signaling pathway,hsa04062:Chemokine signaling pathway,hsa04360:Axon guidance,hsa04370:VEGF signaling pathway,hsa04510:Focal adhesion,hsa04670:Leukocyte transendothelial migration,hsa04810:Regulation of actin cytoskeleton,hsa05200:Pathways in cancer,hsa05222:Small cell lung cancer,
38415_at, 1241_at	ptp4a2	protein tyrosine phosphatase type IVA, member 2	1p35	8073
35342_at	ptplb	protein tyrosine phosphatase-like (proline instead of catalytic arginine), member b	3q21.1	201562		hsa01040:Biosynthesis of unsaturated fatty acids,
36204_at	ptprf	protein tyrosine phosphatase, receptor type, F	1p34	5792		hsa04514:Cell adhesion molecules (CAMs),hsa04520:Adherens junction,hsa04910:Insulin signaling pathway,
491_at	PTPRG	protein tyrosine phosphatase, receptor type, G	3p21-p14	5793
1488_at	PTPRK	protein tyrosine phosphatase, receptor type, K	6q22.2-q22.3	5796
1364_at	ptprz1	protein tyrosine phosphatase, receptor-type, Z polypeptide 1	7q31.3	5803	H. pylori infection, susceptibility to,	hsa05120:Epithelial cell signaling in Helicobacter pylori infection,
36369_at, 34320_at	PTRF	polymerase I and transcript release factor	17q21.31	284119
35697_at	pts	6-pyruvoyltetrahydropterin synthase	11q22.3-q23.3	5805	Hyperphenylalaninemia due to PTS deficiency,Hyperphenylalaninemia, BH4-deficient, A,Phenylketonuria due to PTS deficiency,	hsa00790:Folate biosynthesis,
40412_at	PTTG1 Pttg2	pituitary tumor-transforming 1; pituitary tumor-transforming 2	4p12 5q35.1	10744 9232		hsa04110:Cell cycle,hsa04114:Oocyte meiosis,
39003_at	Pttg1ip	pituitary tumor-transforming 1 interacting protein	21q22.3	754
40816_at	PWP1	PWP1 homolog (S. cerevisiae)	12q23.3	11137
37555_at	PWP2	PWP2 periodic tryptophan protein homolog (yeast)	21q22.3	5822
39327_at	PXDN	peroxidasin homolog (Drosophila)	2p25	7837
36667_at	pygb	phosphorylase, glycogen; brain	20p11.2-p11.1	5834		hsa00500:Starch and sucrose metabolism,hsa04910:Insulin signaling pathway,
37215_at	PYGL	phosphorylase, glycogen, liver	14q21-q22	5836	Glycogen storage disease VI,	hsa00500:Starch and sucrose metabolism,hsa04910:Insulin signaling pathway,
34685_at	PYROXD1	pyridine nucleotide-disulphide oxidoreductase domain 1	12p12.1	79912
260_at	QDPR	quinoid dihydropteridine reductase	4p15.31	5860	Hyperphenylalaninemia due to dihydropteridine reductase deficiency,Hyperphenylalaninemia, BH4-deficient, C,Phenylketonuria due to dihydropteridine reductase deficiency,	hsa00790:Folate biosynthesis,
36610_at	R3hdm1	R3H domain containing 1	2q21.3	23518
41523_at	RAB32	RAB32, member RAS oncogene family	6q24.3	10981
37466_at	Rab7l1	RAB7, member RAS oncogene family-like 1	1q32	8934
32741_at	RABEP1	rabaptin, RAB GTPase binding effector protein 1	17p13.2	9135		hsa04144:Endocytosis,
781_at, 37703_at	RABGGTB	Rab geranylgeranyltransferase, beta subunit	1p31	5876
32737_at, 32736_at	rac2	ras-related C3 botulinum toxin substrate 2 (rho family, small GTP binding protein Rac2)	22q13.1	5880	Neutrophil immunodeficiency syndrome,	hsa04010:MAPK signaling pathway,hsa04062:Chemokine signaling pathway,hsa04310:Wnt signaling pathway,hsa04360:Axon guidance,hsa04370:VEGF signaling pathway,hsa04510:Focal adhesion,hsa04520:Adherens junction,hsa04650:Natural killer cell mediated cytotoxicity,hsa04662:B cell receptor signaling pathway,hsa04664:Fc epsilon RI signaling pathway,hsa04666:Fc gamma R-mediated phagocytosis,hsa04670:Leukocy…
41480_at	RAD51C	RAD51 homolog C (S. cerevisiae)	17q22-q23	5889		hsa03440:Homologous recombination,
1876_at, 1877_g_at, 39253_s_at	RALA	v-ral simian leukemia viral oncogene homolog A (ras related)	7p15-p13	5898		hsa05200:Pathways in cancer,hsa05212:Pancreatic cancer,
32776_at	RALB	v-ral simian leukemia viral oncogene homolog B (ras related; GTP binding protein)	2cen-q13	5899		hsa05200:Pathways in cancer,hsa05212:Pancreatic cancer,
36125_s_at	RALY	RNA binding protein, autoantigenic (hnRNP-associated with lethal yellow homolog (mouse))	20q11.21-q11.23	22913
1839_at, 38708_at, 1840_g_at	Ran	RAN, member RAS oncogene family	12q24.3	5901
40146_at, 1903_at	Rap1b	RAP1B, member of RAS oncogene family	12q14	5908		hsa04010:MAPK signaling pathway,hsa04062:Chemokine signaling pathway,hsa04510:Focal adhesion,hsa04670:Leukocyte transendothelial migration,hsa04720:Long-term potentiation,hsa04722:Neurotrophin signaling pathway,hsa05211:Renal cell carcinoma,
32602_at, 1624_at	Rap1gds1	RAP1, GTP-GDP dissociation stimulator 1	4q23-q25	5910	Lymphocytic leukemia, acute T-cell,
549_at	rars	arginyl-tRNA synthetase	5q35.1	5917		hsa00970:Aminoacyl-tRNA biosynthesis,
36935_at, 1675_at	Rasa1	RAS p21 protein activator (GTPase activating protein) 1	5q13.3	5921	Basal cell carcinoma, somatic,Capillary malformation-arteriovenous malformation,Parkes Weber syndrome,	hsa04010:MAPK signaling pathway,hsa04360:Axon guidance,
2044_s_at, 1571_f_at	RB1	retinoblastoma 1	13q14.2	5925	Bladder cancer,Osteosarcoma,Pinealoma with bilateral retinoblastoma,Retinoblastoma,	hsa04110:Cell cycle,hsa05200:Pathways in cancer,hsa05212:Pancreatic cancer,hsa05214:Glioma,hsa05215:Prostate cancer,hsa05218:Melanoma,hsa05219:Bladder cancer,hsa05220:Chronic myeloid leukemia,hsa05222:Small cell lung cancer,hsa05223:Non-small cell lung cancer,
35227_at	RBBP8	retinoblastoma binding protein 8	18q11.2	5932	Many sequence variants affecting diversity of adult human height,Pancreatic carcinoma, somatic,
32203_at, 32202_at	RBCK1	RanBP-type and C3HC4-type zinc finger containing 1	20p13	10616
41460_at	RBM14 RBM4	RNA binding motif protein 14; RNA binding motif protein 4	11q13 11q13.1	10432 5936
41741_at	RBM3	RNA binding motif (RNP1, RRM) protein 3	Xp11.2 Xp11.23	5935
33234_at	Rbm34	RNA binding motif protein 34	1q42.3	23029
40260_g_at	RBM9	RNA binding motif protein 9	22q13.1	23543
38047_at, 34163_g_at, 34162_at	Rbpms	RNA binding protein with multiple splicing	8p12-p11	11030
37927_at, 1196_at	rcc1 SNHG3-RCC1	regulator of chromosome condensation 1; SNHG3-RCC1 readthrough transcript	1p36.1	1104 751867
40556_at	RCN1	reticulocalbin 1, EF-hand calcium binding domain	11p13	5954
37727_i_at, 37728_r_at	RCN2	reticulocalbin 2, EF-hand calcium binding domain	15q23	5955
41407_at	RDBP	RD RNA binding protein	6p21.3	7936
34887_at, 34886_at	rdx	radixin	11q23	5962	Deafness, autosomal recessive, 24,	hsa04810:Regulation of actin cytoskeleton,
354_s_at, 34684_at	RECQL	RecQ protein-like (DNA helicase Q1-like)	12p12	5965
1252_at	REEP5	receptor accessory protein 5	5q22-q23	7905
39269_at	RFC3	replication factor C (activator 1) 3, 38kDa	13q12.3-q13	5983		hsa03030:DNA replication,hsa03420:Nucleotide excision repair,hsa03430:Mismatch repair,
1055_g_at	RfC4	replication factor C (activator 1) 4, 37kDa	3q27	5984		hsa03030:DNA replication,hsa03420:Nucleotide excision repair,hsa03430:Mismatch repair,
40166_at	RFC5	replication factor C (activator 1) 5, 36.5kDa	12q24.23	5985		hsa03030:DNA replication,hsa03420:Nucleotide excision repair,hsa03430:Mismatch repair,
32593_at	Rftn1	raftlin, lipid raft linker 1	3p24.3	23180
32144_at	RFX5	regulatory factor X, 5 (influences HLA class II expression)	1q21	5993	Bare lymphocyte syndrome, type II, complementation group C,Bare lymphocyte syndrome, type II, complementation group E,	hsa04612:Antigen processing and presentation,hsa05340:Primary immunodeficiency,
33121_g_at	Rgs10	regulator of G-protein signaling 10	10q25	6001
34268_at	rgs19	regulator of G-protein signaling 19	20q13.33	10287
1659_s_at	rheb	Ras homolog enriched in brain	7q36	6009		hsa04150:mTOR signaling pathway,hsa04910:Insulin signaling pathway,
1395_at	RHOC	ras homolog gene family, member C	1p13.1	389
40555_at	rhoq RHOQP2	ras homolog gene family, member Q; similar to small GTP binding protein TC10	2p21 2q21.1	23433 730041		hsa04910:Insulin signaling pathway,
1778_g_at, 39532_at	RIN1	Ras and Rab interactor 1	11q13.1	9610
36550_at	RIN2	Ras and Rab interactor 2	20p11.22	54453
31732_at	RLN2	relaxin 2	9p24.1	6019
38670_at	RNF114	ring finger protein 114	20q13.13	55905
32129_at	RNF115	ring finger protein 115	1q21.1	27246
33343_at	RNF14	ring finger protein 14	5q23.3-q31.1	9604
36959_at	Rnpep	arginyl aminopeptidase (aminopeptidase B)	1q32	6051
34735_at	ROCK1 ROCK1P1	similar to Rho-associated, coiled-coil containing protein kinase 1; Rho-associated, coiled-coil containing protein kinase 1	18p11.32 18q11.1	6093 727758		hsa04062:Chemokine signaling pathway,hsa04270:Vascular smooth muscle contraction,hsa04310:Wnt signaling pathway,hsa04350:TGF-beta signaling pathway,hsa04360:Axon guidance,hsa04510:Focal adhesion,hsa04670:Leukocyte transendothelial migration,hsa04810:Regulation of actin cytoskeleton,hsa05130:Pathogenic Escherichia coli infection,
39964_at	rp2	retinitis pigmentosa 2 (X-linked recessive)	Xp11.4-p11.21	6102	Retinitis pigmentosa-2,Xp11.3 deletion syndrome,
38481_at, 1382_at	RPA1	replication protein A1, 70kDa	17p13.3	6117		hsa03030:DNA replication,hsa03420:Nucleotide excision repair,hsa03430:Mismatch repair,hsa03440:Homologous recombination,
651_at, 652_g_at	Rpa3	replication protein A3, 14kDa	7p22	6119		hsa03030:DNA replication,hsa03420:Nucleotide excision repair,hsa03430:Mismatch repair,hsa03440:Homologous recombination,
36786_at	RPL10A RPL10AP6 RPL10AP9	ribosomal protein L10a pseudogene 6; ribosomal protein L10a; ribosomal protein L10a pseudogene 9	3p14.2 5q14.3 6p21.3-p21.2	100128936 4736 728979		hsa03010:Ribosome,
39856_at	RPL36AL	ribosomal protein L36a-like	14q21	6166		hsa03010:Ribosome,
33485_at	rpl4 RPL4P4 RPL4P5	ribosomal protein L4; ribosomal protein L4 pseudogene 5; ribosomal protein L4 pseudogene 4	15q22 3q27.2 9p24.1	158345 6124 647276		hsa03010:Ribosome,
33660_at	rpl5 RPL5P1 RPL5P34	ribosomal protein L5 pseudogene 34; ribosomal protein L5 pseudogene 1; ribosomal protein L5	15q11.2 1p22.1 22q13.2	388907 6125 647436	Diamond-Blackfan anemia 6,Risk alleles for multiple sclerosis identified by a genomewide study,	hsa03010:Ribosome,
41214_at	RPS4Y1	ribosomal protein S4, Y-linked 1	Yp11.3	6192		hsa03010:Ribosome,
1127_at	RPS6KA1	ribosomal protein S6 kinase, 90kDa, polypeptide 1	1p	6195		hsa04010:MAPK signaling pathway,hsa04114:Oocyte meiosis,hsa04150:mTOR signaling pathway,hsa04720:Long-term potentiation,hsa04722:Neurotrophin signaling pathway,hsa04914:Progesterone-mediated oocyte maturation,
35316_at	rraga	Ras-related GTP binding A	9p22.1	10670
1879_at, 38338_at	Rras	related RAS viral (r-ras) oncogene homolog	19q13.3-qter	6237		hsa04010:MAPK signaling pathway,hsa04530:Tight junction,hsa04810:Regulation of actin cytoskeleton,
33212_at	RRBP1	ribosome binding protein 1 homolog 180kDa (dog)	20p12	6238
34314_at	Rrm1	ribonucleotide reductase M1	11p15.5	6240		hsa00230:Purine metabolism,hsa00240:Pyrimidine metabolism,hsa00480:Glutathione metabolism,
31863_at	Rrp1b	ribosomal RNA processing 1 homolog B (S. cerevisiae)	21q22.3	23076
33307_at	RRP7A RRP7B	ribosomal RNA processing 7 homolog B (S. cerevisiae); ribosomal RNA processing 7 homolog A (S. cerevisiae)	22q13.2 22q13.2-q13.31	27341 91695
36858_at	rrs1	RRS1 ribosome biogenesis regulator homolog (S. cerevisiae)	8q13.1	23212
37161_at, 39418_at	Rsl1d1	ribosomal L1 domain containing 1	16p13.13	26156
32544_s_at	rsu1	Ras suppressor protein 1	10p13	6251
35195_at	rtcd1	RNA terminal phosphate cyclase domain 1	1p21.2	8634
31536_at	rtn4	reticulon 4	2p16.3	57142
39421_at, 943_at, 393_s_at	Runx1	runt-related transcription factor 1	21q22.3	861	Leukemia, acute myeloid,Platelet disorder, familial, with associated myeloid malignancy,Rheumatoid arthritis, susceptibility to,	hsa05200:Pathways in cancer,hsa05220:Chronic myeloid leukemia,hsa05221:Acute myeloid leukemia,
40124_at	Ruvbl1	RuvB-like 1 (E. coli)	3q21	8607		hsa04310:Wnt signaling pathway,
35758_at	RUVBL2	RuvB-like 2 (E. coli)	19q13.3	10856
39338_at	S100A10	S100 calcium binding protein A10	1q21	6281
39712_at	S100A13	S100 calcium binding protein A13	1q21	6284
2027_at, 35726_at	S100A2	S100 calcium binding protein A2	1q21	6273
36511_at	SACM1L	SAC1 suppressor of actin mutations 1-like (yeast)	3p21.3	22908
32102_at	SACS	spastic ataxia of Charlevoix-Saguenay (sacsin)	13q12	26278	A Genome-Wide Association Study Identifies Protein Quantitative Trait Loci (pQTLs),Spastic ataxia, Charlevoix-Saguenay type,
32099_at	SAFB2	scaffold attachment factor B2	19p13.3	9667
34714_at	SAMHD1	SAM domain and HD domain 1	20pter-q12	25939
34845_at	Samm50	sorting and assembly machinery component 50 homolog (S. cerevisiae)	22q13.31	25813	Population-based genome-wide association studies reveal six loci influencing plasma levels of liver enzymes,
1173_g_at, 34304_s_at	Sat1	spermidine/spermine N1-acetyltransferase 1	Xp22.1	6303	Keratosis follicularis spinulosa decalvans,	hsa00330:Arginine and proline metabolism,
41200_at	SCARB1	scavenger receptor class B, member 1	12q24.31	949
33823_at	scarb2	scavenger receptor class B, member 2	4q21.1	950	Action myoclonus-renal failure syndrome,	hsa04142:Lysosome,
33930_at	SCFD1	sec1 family domain containing 1	14q12	23256
34265_at	SCG5	secretogranin V (7B2 protein)	15q13-q14	6447
36536_at	SCHIP1	schwannomin interacting protein 1	3q25.33	29970	Newly identified genetic risk variants for celiac disease related to the immune response,
36192_at	SCRN1	secernin 1	7p14.3-p14.1	9805
35844_at	Sdc4	syndecan 4	20q12	6385		hsa04512:ECM-receptor interaction,hsa04514:Cell adhesion molecules (CAMs),
38110_at	sdcbp	syndecan binding protein (syntenin)	8q12	6386
34826_at	SDHA	succinate dehydrogenase complex, subunit A, flavoprotein (Fp)	5p15	6389	Leigh syndrome,Mitochondrial respiratory chain complex II deficiency,	hsa00020:Citrate cycle (TCA cycle),hsa00190:Oxidative phosphorylation,hsa05010:Alzheimer's disease,hsa05012:Parkinson's disease,hsa05016:Huntington's disease,
35751_at	SdhB	succinate dehydrogenase complex, subunit B, iron sulfur (Ip)	1p36.1-p35	6390	Cowden-like syndrome,Paraganglioma and gastric stromal sarcoma,Paraganglioma, familial chromaffin, 4,Pheochromocytoma,	hsa00020:Citrate cycle (TCA cycle),hsa00190:Oxidative phosphorylation,hsa05010:Alzheimer's disease,hsa05012:Parkinson's disease,hsa05016:Huntington's disease,
39139_at	SEC11A	SEC11 homolog A (S. cerevisiae)	15q25.3	23478
33423_g_at, 33422_at	sec13	SEC13 homolog (S. cerevisiae)	3p25-p24	6396
39099_at	SEC23A	Sec23 homolog A (S. cerevisiae)	14q21.1	10484	Craniolenticulosutural dysplasia,
32770_at	SEC24D	SEC24 family, member D (S. cerevisiae)	4q26	9871
39169_at	sec61g	Sec61 gamma subunit	7p11.2	23480		hsa05110:Vibrio cholerae infection,
34349_at	SEC63	SEC63 homolog (S. cerevisiae)	6q21	11231	Polycystic liver disease,
41585_at	Sel1l3	KIAA0746 protein	4p15.2	23231
40441_g_at	serbp1	SERPINE1 mRNA binding protein 1	1p31	26135
33305_at	SERPINB1	serpin peptidase inhibitor, clade B (ovalbumin), member 1	6p25	1992
38125_at, 672_at	SERPINE1	serpin peptidase inhibitor, clade E (nexin, plasminogen activator inhibitor type 1), member 1	7q21.3-q22	5054	Hemorrhagic diathesis due to PAI1 deficiency,Thrombophilia due to excessive plasminogen activator inhibitor,	hsa04115:p53 signaling pathway,hsa04610:Complement and coagulation cascades,
41246_at	SERPINE2	serpin peptidase inhibitor, clade E (nexin, plasminogen activator inhibitor type 1), member 2	2q33-q35	5270
39166_s_at, 39167_r_at	SERPINH1	serpin peptidase inhibitor, clade H (heat shock protein 47), member 1, (collagen binding protein 1)	11q13.5	871	Preterm premature rupture of the membranes, susceptibility to,
37379_at	sf3a3	splicing factor 3a, subunit 3, 60kDa	1p34.3	10946		hsa03040:Spliceosome,
36973_at	SF3B2	splicing factor 3b, subunit 2, 145kDa	11q13.1	10992		hsa03040:Spliceosome,
40638_at	sfpq	splicing factor proline/glutamine-rich (polypyrimidine tract binding protein associated)	1p34.3	6421
32521_at	Sfrp1	secreted frizzled-related protein 1	8p12-p11.1	6422		hsa04310:Wnt signaling pathway,
36098_at, 36099_at	SFRS1	splicing factor, arginine/serine-rich 1	17q21.3-q22	6426		hsa03040:Spliceosome,
36111_s_at, 36112_r_at	SFRS2	splicing factor, arginine/serine-rich 2	17q25.2	6427		hsa03040:Spliceosome,
351_f_at, 40457_at	SFRS3	splicing factor, arginine/serine-rich 3	6p21	6428		hsa03040:Spliceosome,
32165_at	sfrs7	splicing factor, arginine/serine-rich 7, 35kDa	2p22.1	6432		hsa03040:Spliceosome,
40127_at	SFXN3	sideroflexin 3	10q24.31	81855
41449_at	SGCE	sarcoglycan, epsilon	7q21-q22	8910	Dystonia, myoclonic,Dystonia-11, myoclonic,
39428_at	SH2B3	SH2B adaptor protein 3	12q24	10019	Celiac disease, susceptiblity to, 13,Diabetes mellitus, insulin-dependent, susceptibility to,Genome-wide association study of 14,000 cases of seven common diseases and 3,000 shared controls,Newly identified genetic risk variants for celiac disease related to the immune response,	hsa04722:Neurotrophin signaling pathway,
39714_at	SH3BGRL	SH3 domain binding glutamic acid-rich protein like	Xq13.3	6451
39691_at	sh3glb1	SH3-domain GRB2-like endophilin B1	1p22	51100		hsa04144:Endocytosis,
38118_at	SHC1	SHC (Src homology 2 domain containing) transforming protein 1	1q21	6464		hsa04012:ErbB signaling pathway,hsa04062:Chemokine signaling pathway,hsa04510:Focal adhesion,hsa04650:Natural killer cell mediated cytotoxicity,hsa04722:Neurotrophin signaling pathway,hsa04910:Insulin signaling pathway,hsa05214:Glioma,hsa05220:Chronic myeloid leukemia,
34738_at	SHMT1	serine hydroxymethyltransferase 1 (soluble)	17p11.2	6470		hsa00260:Glycine, serine and threonine metabolism,hsa00460:Cyanoamino acid metabolism,hsa00670:One carbon pool by folate,hsa00680:Methane metabolism,
36178_at	SHMT2	serine hydroxymethyltransferase 2 (mitochondrial)	12q12-q14	6472		hsa00260:Glycine, serine and threonine metabolism,hsa00460:Cyanoamino acid metabolism,hsa00670:One carbon pool by folate,hsa00680:Methane metabolism,
39020_at	SIVA1	SIVA1, apoptosis-inducing factor	14q32.33	10572
36091_at	skap2	src kinase associated phosphoprotein 2	7p21-p15	8935
41557_at	SKIV2L2	superkiller viralicidic activity 2-like 2 (S. cerevisiae)	5q11.2	23517		hsa03018:RNA degradation,
36913_at	Slbp	stem-loop binding protein	4p16.3	7884
39521_at	Slc12a4	solute carrier family 12 (potassium/chloride transporters), member 4	16q22.1	6560
36206_at	SLC16A1	solute carrier family 16, member 1 (monocarboxylic acid transporter 1)	1p12	6566	Erythrocyte lactate transporter defect,Hyperinsulinemic hypoglycemia, familial, 7,
36590_at	SLC16A2	solute carrier family 16, member 2 (monocarboxylic acid transporter 8)	Xq13.2	6567	Allan-Herndon syndrome,Allan-Herndon-Dudley mental retardation syndrome,Allan-Herndon-Dudley syndrome,
33143_s_at	SLC16A3	solute carrier family 16, member 3 (monocarboxylic acid transporter 4)	17q25	9123
41126_at	slc1a4	solute carrier family 1 (glutamate/neutral amino acid transporter), member 4	2p15-p13	6509
41778_at	SLC1A5	solute carrier family 1 (neutral amino acid transporter), member 5	19q13.3	6510
1138_at	SLC20A1	solute carrier family 20 (phosphate transporter), member 1	2q11-q14	6574
1137_at, 36956_at	SLC20A2	solute carrier family 20 (phosphate transporter), member 2	8p12-p11	6575
38998_g_at, 38997_at	slc25a1	solute carrier family 25 (mitochondrial carrier; citrate transporter), member 1	22q11.21	6576
37675_at	SLC25A3	solute carrier family 25 (mitochondrial carrier; phosphate carrier), member 3	12q23	5250	Micochondrial phosphate carrier deficiency,
34804_at	SLC25A36	solute carrier family 25, member 36	3q23	55186	Genome-wide association analysis of susceptibility and clinical phenotype in multiple sclerosis,
32822_at	SLC25A4	solute carrier family 25 (mitochondrial carrier; adenine nucleotide translocator), member 4	4q35	291	Progressive external ophthalmoplegia with mitochondrial DNA deletions,progressive external ophthalmoplegia with mitochondrial DNA deletions 1,progressive external ophthalmoplegia with mitochondrial DNA deletions, autosomal dominant, 2,	hsa04020:Calcium signaling pathway,hsa05012:Parkinson's disease,hsa05016:Huntington's disease,
39637_at	Slc26a2	solute carrier family 26 (sulfate transporter), member 2	5q31-q34	1836	Achondrogenesis Ib,Atelosteogenesis II,De la Chapelle dysplasia,Diastrophic dysplasia,Diastrophic dysplasia, broad bone-platyspondylic variant,Epiphyseal dysplasia, multiple, 4,
33901_at	Slc29a1	solute carrier family 29 (nucleoside transporters), member 1	6p21.2-p21.1	2030
36979_at	SLC2A3	solute carrier family 2 (facilitated glucose transporter), member 3	12p13.3	6515
38208_at	SLC35A3	solute carrier family 35 (UDP-N-acetylglucosamine (UDP-GlcNAc) transporter), member A3	1p21	23443
38005_at	SLC35D2	solute carrier family 35, member D2	9q22.32	11046
38797_at	slc39a14	solute carrier family 39 (zinc transporter), member 14	8p21.3	23516
40456_at	SLC39A8	solute carrier family 39 (zinc transporter), member 8	4q22-q24	64116
37489_s_at	SLC4A3	solute carrier family 4, anion exchanger, member 3	2q36	6508
34936_at	Slc4a7	solute carrier family 4, sodium bicarbonate cotransporter, member 7	3p22	9497
36318_at	Slc6a15	solute carrier family 6 (neutral amino acid transporter), member 15	12q21.3	55117
39748_at	SLC7A1	solute carrier family 7 (cationic amino acid transporter, y+ system), member 1	13q12-q14	6541
32186_at	SLC7A5	solute carrier family 7 (cationic amino acid transporter, y+ system), member 5	16q24.3	8140
1928_s_at	SMAD2	SMAD family member 2	18q21.1	4087		hsa04110:Cell cycle,hsa04310:Wnt signaling pathway,hsa04350:TGF-beta signaling pathway,hsa04520:Adherens junction,hsa05200:Pathways in cancer,hsa05210:Colorectal cancer,hsa05212:Pancreatic cancer,
38944_at, 1433_g_at	SMAD3	SMAD family member 3	15q22.33	4088	Genomewide association analysis of coronary artery disease,	hsa04110:Cell cycle,hsa04310:Wnt signaling pathway,hsa04350:TGF-beta signaling pathway,hsa04520:Adherens junction,hsa05200:Pathways in cancer,hsa05210:Colorectal cancer,hsa05212:Pancreatic cancer,hsa05220:Chronic myeloid leukemia,
36953_at, 509_at, 510_g_at	smad4	SMAD family member 4	18q21.1	4089	Juvenile polyposis/hereditary hemorrhagic telangiectasia syndrome,Pancreatic cancer,Polyposis, juvenile intestinal,	hsa04110:Cell cycle,hsa04310:Wnt signaling pathway,hsa04350:TGF-beta signaling pathway,hsa04520:Adherens junction,hsa05200:Pathways in cancer,hsa05210:Colorectal cancer,hsa05212:Pancreatic cancer,hsa05220:Chronic myeloid leukemia,
40213_at	SMARCA1	SWI/SNF related, matrix associated, actin dependent regulator of chromatin, subfamily a, member 1	Xq25	6594
32849_at	Smc1a	structural maintenance of chromosomes 1A	Xp11.22-p11.21	8243	Cornelia de Lange syndrome 2,	hsa04110:Cell cycle,hsa04114:Oocyte meiosis,
34763_at	smc3	structural maintenance of chromosomes 3	10q25	9126	Cornelia de Lange syndrome 3,	hsa04110:Cell cycle,hsa04114:Oocyte meiosis,
34878_at	SMC4	structural maintenance of chromosomes 4	3q26.1	10051
41379_at	smc5	structural maintenance of chromosomes 5	9q21.11	23137
37313_at	Smn1 smn2	survival of motor neuron 1, telomeric; survival of motor neuron 2, centromeric	5q13	6606 6607	Spinal muscular atrophy-1,Spinal muscular atrophy-2,Spinal muscular atrophy-3,Spinal muscular atrophy-4,
33354_at	SMURF2	SMAD specific E3 ubiquitin protein ligase 2	17q22-q23	64750		hsa04120:Ubiquitin mediated proteolysis,hsa04144:Endocytosis,hsa04350:TGF-beta signaling pathway,
38288_at	snai2	snail homolog 2 (Drosophila)	8q11	6591	Melanoma metastasis, modification of,Piebaldism,Waardenburg syndrome, type IID,	hsa04520:Adherens junction,
32178_r_at, 32179_s_at	snap23	synaptosomal-associated protein, 23kDa	15q15.1	8773		hsa04130:SNARE interactions in vesicular transport,
35488_at	SNAPC1	small nuclear RNA activating complex, polypeptide 1, 43kDa	14q22	6617
37730_at	SND1	staphylococcal nuclease and tudor domain containing 1	7q31.3	27044
41370_at	SNRNP40	small nuclear ribonucleoprotein 40kDa (U5)	1p35.2	9410		hsa03040:Spliceosome,
40875_s_at	SNRNP70	small nuclear ribonucleoprotein 70kDa (U1)	19q13.3	6625		hsa03040:Spliceosome,
40842_at	snrpa	small nuclear ribonucleoprotein polypeptide A	19q13.1	6626		hsa03040:Spliceosome,
38455_at, 38456_s_at	SNRPB	small nuclear ribonucleoprotein polypeptides B and B1	20p13	6628		hsa03040:Spliceosome,hsa05322:Systemic lupus erythematosus,
41403_at	SNRPF	small nuclear ribonucleoprotein polypeptide F	12q22	6636		hsa03040:Spliceosome,
34842_at	SNRPN SNURF	small nuclear ribonucleoprotein polypeptide N; SNRPN upstream reading frame	15q11.2 15q12	6638 8926	Framingham Heart Study genome-wide association: results for pulmonary function measures,Prader-Willi syndrome,
39360_at	snx3	sorting nexin 3	6q21	8724	Microphthalmia, syndromic 8,
36216_at, 40605_at	SNX4	sorting nexin 4	3q21.2	8723
37808_at	snx7	sorting nexin 7	1p21.3	51375
38994_at	socs2	suppressor of cytokine signaling 2	12q	8835	Genome-wide association analysis identifies 20 loci that influence adult height,Many sequence variants affecting diversity of adult human height,	hsa04630:Jak-STAT signaling pathway,hsa04910:Insulin signaling pathway,hsa04930:Type II diabetes mellitus,
36620_at	SOD1	superoxide dismutase 1, soluble	21q22.1 21q22.1|21q22.11	6647	Amyotrophic lateral sclerosis, due to SOD1 deficiency,	hsa05014:Amyotrophic lateral sclerosis (ALS),hsa05016:Huntington's disease,hsa05020:Prion diseases,
38411_at, 32140_at	SORL1	sortilin-related receptor, L(DLR class) A repeats-containing	11q23.2-q24.2	6653	Alzheimer disease, pathogenesis, association with,
41043_at	Sox15	SRY (sex determining region Y)-box 15	17p13	6665
33436_at	SOX9	SRY (sex determining region Y)-box 9	17q24.3-q25.1	6662	Acampomelic campomelic dysplasia,Campomelic dysplasia,Campomelic dysplasia with autosomal sex reversal,
37353_g_at	Sp100	SP100 nuclear antigen	2q37.1	6672
40142_at	Spa17	sperm autoantigenic protein 17	11q24.2	53340
32120_at	SPAG5	sperm associated antigen 5	17q11.2	10615
671_at	SPARC	secreted protein, acidic, cysteine-rich (osteonectin)	5q31.3-q32	6678
38940_at	spc25	SPC25, NDC80 kinetochore complex component, homolog (S. cerevisiae)	2q24.3	57405
34218_at	speG	SPEG complex locus	2q35	10290
40615_at	SPG11	spastic paraplegia 11 (autosomal recessive)	15q14	80208	Spastic paraplegia-11,
40602_at	SPRED2	sprouty-related, EVH1 domain containing 2	2p14	200734		hsa04630:Jak-STAT signaling pathway,
33700_at	SPRY2	sprouty homolog 2 (Drosophila)	13q31.1	10253		hsa04630:Jak-STAT signaling pathway,
36069_at	srgap2	SLIT-ROBO Rho GTPase activating protein 2	1q32.1	23380		hsa04360:Axon guidance,
39055_at	SRI	sorcin	7q21.1	6717
241_g_at	SRM	spermidine synthase	1p36-p22	6723		hsa00270:Cysteine and methionine metabolism,hsa00330:Arginine and proline metabolism,hsa00410:beta-Alanine metabolism,hsa00480:Glutathione metabolism,
41194_at	SRP14 SRP14P1	signal recognition particle 14kDa (homologous Alu RNA binding protein) pseudogene 1; signal recognition particle 14kDa (homologous Alu RNA binding protein)	12p13.31 15q22	390284 6727		hsa03060:Protein export,
31670_s_at, 33837_at	SRP72	signal recognition particle 72kDa	4q11	6731		hsa03060:Protein export,
36981_at	srp9 SRP9L1	signal recognition particle 9-like 1; signal recognition particle 9kDa	10q23.32 1q42.12	653226 6726		hsa03060:Protein export,
31855_at	SRPX	sushi-repeat-containing protein, X-linked	Xp21.1	8406
41737_at	SRRM1	serine/arginine repetitive matrix 1	1p36.11	10250
38450_at	ssb	Sjogren syndrome antigen B (autoantigen La)	2q31.1	6741		hsa05322:Systemic lupus erythematosus,
38846_at, 39086_g_at	SSBP1	single-stranded DNA binding protein 1	7q34	6742		hsa03030:DNA replication,hsa03430:Mismatch repair,hsa03440:Homologous recombination,
34649_at, 34648_at	SSR1	signal sequence receptor, alpha	6p24.3	6745
36147_at	ssr2	signal sequence receptor, beta (translocon-associated protein beta)	1q21-q23	6746
37739_at	ssrp1	structure specific recognition protein 1	11q12	6749
34256_at	st3gal5	ST3 beta-galactoside alpha-2,3-sialyltransferase 5	2p11.2	8869	Amish infantile epilepsy syndrome,	hsa00604:Glycosphingolipid biosynthesis,
41352_at	ST6GAL1	ST6 beta-galactosamide alpha-2,6-sialyltranferase 1	3q27-q28	6480		hsa00510:N-Glycan biosynthesis,
34693_at	St6galnac2	ST6 (alpha-N-acetyl-neuraminyl-2,3-beta-galactosyl-1,3)-N-acetylgalactosaminide alpha-2,6-sialyltransferase 2	17q25.1	10610
38525_at	STAM2	signal transducing adaptor molecule (SH3 domain and ITAM motif) 2	2q23.3	10254		hsa04144:Endocytosis,hsa04630:Jak-STAT signaling pathway,
39391_at	STAMBP	STAM binding protein	2p13.1	10617		hsa04144:Endocytosis,
41295_at	STARD7	StAR-related lipid transfer (START) domain containing 7	2q11.2	56910
33339_g_at, AFFX-HUMISGF3A/M97935_MB_at, 32859_at, AFFX-HUMISGF3A/M97935_3_at, 32860_g_at	STAT1	signal transducer and activator of transcription 1, 91kDa	2q32.2	6772	Mycobacterial infection, atypical, familial disseminated,STAT1 deficiency, complete,	hsa04062:Chemokine signaling pathway,hsa04620:Toll-like receptor signaling pathway,hsa04630:Jak-STAT signaling pathway,hsa05200:Pathways in cancer,hsa05212:Pancreatic cancer,
40297_at	STEAP1	six transmembrane epithelial antigen of the prostate 1	7q21	26872
32767_at	STIL	SCL/TAL1 interrupting locus	1q32 1q32|1p32	6491	Microcephaly, primary autosomal recessive, 7,
40104_at	Stk25	serine/threonine kinase 25 (STE20 homolog, yeast)	2q37.3	10494
32142_at	Stk3	serine/threonine kinase 3 (STE20 homolog, yeast)	8q22.2	6788		hsa04010:MAPK signaling pathway,
40966_at	stk39	serine threonine kinase 39 (STE20/SPS1 homolog, yeast)	2q24.3	27347	Whole-genome association study identifies STK39 as a hypertension susceptibility gene,
1782_s_at	STMN1	stathmin 1	1p36.1-p35	3925		hsa04010:MAPK signaling pathway,
40419_at	stom	stomatin	12q24.23 9q34.1	2040
34380_at	Stoml2	stomatin (EPB72)-like 2	9p13.1	30968
37991_at	stt3a	STT3, subunit of the oligosaccharyltransferase complex, homolog A (S. cerevisiae)	11q23.3	3703		hsa00510:N-Glycan biosynthesis,
37510_at	Stx8	syntaxin 8	17p12	9482		hsa04130:SNARE interactions in vesicular transport,
36171_at	sub1	SUB1 homolog (S. cerevisiae)	5p13.3	10923
155_s_at, 457_s_at	Sumo1 SUMO1P3	SMT3 suppressor of mif two 3 homolog 1 (S. cerevisiae); SUMO1 pseudogene 3	1q22 2q33	474338 7341	Orofacial cleft 10,
38738_at	Sumo2 SUMO2P SUMO3	SMT3 suppressor of mif two 3 homolog 2 (S. cerevisiae) pseudogene; SMT3 suppressor of mif two 3 homolog 2 (S. cerevisiae); SMT3 suppressor of mif two 3 homolog 3 (S. cerevisiae)	17q25.1 21q22.3 6p22.1	285829 6612 6613
31869_at	SWAP70	SWAP switching B-cell complex 70kDa subunit	11p15	23075
38075_at	SYPL1	synaptophysin-like 1	7q22.2	6856
36822_at	taf15	TAF15 RNA polymerase II, TATA box binding protein (TBP)-associated factor, 68kDa	17q11.1-q11.2	8148	Chondrosarcoma, extraskeletal myxoid,
193_at	TAF9	TAF9 RNA polymerase II, TATA box binding protein (TBP)-associated factor, 32kDa	5q11.2-q13.1	6880		hsa03022:Basal transcription factors,
36678_at	TAGLN2	transgelin 2	1q21-q25	8407
40153_at	tap1	transporter 1, ATP-binding cassette, sub-family B (MDR/TAP)	6p21.3	6890	Bare lymphocyte syndrome, type I,	hsa02010:ABC transporters,hsa04612:Antigen processing and presentation,hsa05340:Primary immunodeficiency,
41168_at	Tapbp	TAP binding protein (tapasin)	6p21.3	6892	Bare lymphocyte syndrome, type I,	hsa04612:Antigen processing and presentation,
39416_at	TAX1BP3	Tax1 (human T-cell leukemia virus type I) binding protein 3	17p13	30851
32506_at	TBC1D1	TBC1 (tre-2/USP6, BUB2, cdc16) domain family, member 1	4p14	23216
34338_at	TBCB	tubulin folding cofactor B	19q13.11-q13.12	1155
39398_s_at	Tbcd	tubulin folding cofactor D	17q25.3	6904
31797_at	TBPL1	TBP-like 1	6q22.1-q22.3	9519		hsa03022:Basal transcription factors,hsa05016:Huntington's disease,
1073_at	TCEA1 TCEA1P2	transcription elongation factor A (SII), 1 pseudogene 2; transcription elongation factor A (SII), 1	3p22 8q11.2	399511 6917
32251_at	TCEAL4	transcription elongation factor A (SII)-like 4	Xq22.2	79921
39426_at	tcerg1	transcription elongation regulator 1	5q31	10915		hsa03040:Spliceosome,
33348_at	TCF12	transcription factor 12	15q21	6938
1373_at	tcf3	transcription factor 3 (E2A immunoglobulin enhancer binding factors E12/E47)	19p13.3	6929	Leukemia, acute lymphoblastic,
34791_at	TCP1 TCP1P3	hypothetical gene supported by BC000665; t-complex 1	12p12.2 6q25.3-q26	400013 6950
32134_at	tes	testis derived transcript (3 LIM domains)	7q31.2	26136
36191_at	TFAM	transcription factor A, mitochondrial	10q21	7019		hsa05016:Huntington's disease,
AFFX-HUMTFRR/M11507_5_at, AFFX-HUMTFRR/M11507_M_at, AFFX-HUMTFRR/M11507_3_at, 37324_at	TFRC	transferrin receptor (p90, CD71)	3q29	7037		hsa04144:Endocytosis,hsa04640:Hematopoietic cell lineage,
41667_s_at	TGDS	TDP-glucose 4,6-dehydratase	13q32.1	23483
1830_s_at	TGFB1	transforming growth factor, beta 1	19q13.2 19q13.2|19q13.1	7040	Camurati-Engelmann disease,Cystic fibrosis lung disease, modifier of,	hsa04010:MAPK signaling pathway,hsa04060:Cytokine-cytokine receptor interaction,hsa04110:Cell cycle,hsa04350:TGF-beta signaling pathway,hsa04672:Intestinal immune network for IgA production,hsa05200:Pathways in cancer,hsa05210:Colorectal cancer,hsa05211:Renal cell carcinoma,hsa05212:Pancreatic cancer,hsa05220:Chronic myeloid leukemia,hsa05410:Hypertrophic cardiomyopathy (HCM),hsa05414:Dilated car…
1385_at	tgfbi	transforming growth factor, beta-induced, 68kDa	5q31	7045	Corneal dystrophy, Avellino type,Corneal dystrophy, epithelial basement membrane,Corneal dystrophy, Groenouw type I,Corneal dystrophy, lattice type I,Corneal dystrophy, lattice type IIIA,Corneal dystrophy, Reis-Bucklers type,Corneal dystrophy, Thiel-Behnke type,
1815_g_at, 1814_at	Tgfbr2	transforming growth factor, beta receptor II (70/80kDa)	3p22	7048	Colorectal cancer, hereditary nonpolyposis, type 6,Esophageal cancer,Framingham Heart Study 100K Project: genome-wide associations for blood pressure and arterial stiffness,Loeys-Dietz syndrome, type 1B,Loeys-Dietz syndrome, type 2B,	hsa04010:MAPK signaling pathway,hsa04060:Cytokine-cytokine receptor interaction,hsa04144:Endocytosis,hsa04350:TGF-beta signaling pathway,hsa04520:Adherens junction,hsa05200:Pathways in cancer,hsa05210:Colorectal cancer,hsa05212:Pancreatic cancer,hsa05220:Chronic myeloid leukemia,
38805_at	Tgif1	TGFB-induced factor homeobox 1	18p11.3	7050	Holoprosencephaly-4,Hypotrichosis simplex, contiguous gene syndrome with,
38404_at	tgm2	transglutaminase 2 (C polypeptide, protein-glutamine-gamma-glutamyltransferase)	20q12	7052		hsa05016:Huntington's disease,
115_at, 867_s_at	Thbs1	thrombospondin 1	15q15	7057		hsa04115:p53 signaling pathway,hsa04350:TGF-beta signaling pathway,hsa04510:Focal adhesion,hsa04512:ECM-receptor interaction,hsa05219:Bladder cancer,
658_at, 659_g_at	thbs2	thrombospondin 2	6q27	7058	Lumbar disc herniation, susceptibility to,	hsa04350:TGF-beta signaling pathway,hsa04510:Focal adhesion,hsa04512:ECM-receptor interaction,
33852_at	Tia1	TIA1 cytotoxic granule-associated RNA binding protein	2p13	7072
38500_at	Ticam2 tmed7	transmembrane emp24 protein transport domain containing 7; toll-like receptor adaptor molecule 2	5q22.3 5q23.1	353376 51014		hsa04620:Toll-like receptor signaling pathway,
41626_at	TIMELESS	timeless homolog (Drosophila)	12q12-q13	8914
32829_at, 32830_g_at	TIMM17A	translocase of inner mitochondrial membrane 17 homolog A (yeast)	1q32.1	10440
1693_s_at	TIMP1	TIMP metallopeptidase inhibitor 1	Xp11.3-p11.23	7076
33035_at	TIPRL	TIP41, TOR signaling pathway regulator-like (S. cerevisiae)	1q23.2	261726
41400_at, 910_at	tk1	thymidine kinase 1, soluble	17q23.2-q25.3	7083		hsa00240:Pyrimidine metabolism,hsa00983:Drug metabolism,
38789_at	tkt	transketolase	3p14.3	7086	Wernicke-Korsakoff syndrome, susceptibility to,	hsa00030:Pentose phosphate pathway,
32166_at	TLN1	talin 1	9p13	7094		hsa04510:Focal adhesion,
33988_at	tmbim6	transmembrane BAX inhibitor motif containing 6	12q12-q13	7009
35754_at	tmed10	transmembrane emp24-like trafficking protein 10 (yeast)	14q24.3	10972
38655_at	TMEM106C	transmembrane protein 106C	12q13.1	79022
41128_at	TMEM183A TMEM183B	transmembrane protein 183A; transmembrane protein 183B	1q32.1 3q25.1	653659 92703
31832_at	TMEM194A	transmembrane protein 194A	12q13.3	23306
41129_at	TMEM41B	transmembrane protein 41B	11p15.4	440026
37445_at	TMEM5	transmembrane protein 5	12q14.2	10329
32791_at	TMEM97	transmembrane protein 97	17q11.2	27346
32683_at	TMPO	thymopoietin	12q22	7112	Cardiomyopathy, dilated, 1T,
31481_s_at	TMSB10	thymosin beta 10	2p11.2	9168
31557_at	TMSB4X TMSL1 TMSL2	thymosin-like 2 (pseudogene); thymosin-like 1 (pseudogene); thymosin beta 4, X-linked	1p34.2 2p25.3 Xq21.3-q22	7114 7115 7116		hsa04810:Regulation of actin cytoskeleton,
34768_at	tmx1	thioredoxin-related transmembrane protein 1	14q22.1	81542
32818_at	TNC	tenascin C	9q33	3371		hsa04510:Focal adhesion,hsa04512:ECM-receptor interaction,
33243_at	TNFAIP8	tumor necrosis factor, alpha-induced protein 8	5q23.1	25816
34892_at	tnfrsf10b	tumor necrosis factor receptor superfamily, member 10b	8p22-p21	8795	Squamous cell carcinoma, head and neck,	hsa04060:Cytokine-cytokine receptor interaction,hsa04115:p53 signaling pathway,hsa04210:Apoptosis,hsa04650:Natural killer cell mediated cytotoxicity,
40463_at, 40464_g_at	tnpo1	transportin 1	5q13.2	3842
37050_r_at	TOMM34	translocase of outer mitochondrial membrane 34		10953
35620_at	tomm40	translocase of outer mitochondrial membrane 40 homolog (yeast)	19q13	10452	A genome-wide association study for late-onset Alzheimer's disease using DNA pooling,Loci influencing lipid levels and coronary heart disease risk in 16 European population cohorts,	hsa05014:Amyotrophic lateral sclerosis (ALS),
32853_at	TOMM70A	translocase of outer mitochondrial membrane 70 homolog A (S. cerevisiae)	3q12.2	9868
1592_at, 40145_at, 904_s_at	TOP2A	topoisomerase (DNA) II alpha 170kDa	17q21-q22	7153	DNA topoisomerase II, resistance to inhibition of, by amsacrine,
38834_at	TOPBP1	topoisomerase (DNA) II binding protein 1	3q22.1	11073	Variants in TF and HFE explain approximately 40% of genetic variation in serum-transferrin levels,
40832_s_at	TOR1AIP1	torsin A interacting protein 1	1q24.2	26092
36079_at	TP53I3	tumor protein p53 inducible protein 3	2p23.3	9540		hsa04115:p53 signaling pathway,
31791_at	tp63	tumor protein p63	3q28	8626	ADULT syndrome,Ectrodactyly, ectodermal dysplasia, and cleft lip/palate syndrome 3,Hay-Wells syndrome,Limb-mammary syndrome,Orofacial cleft 8,Rapp-Hodgkin syndrome,Sequence variant on 8q24 confers susceptibility to urinary bladder cancer,Split-hand/foot malformation, type 4,
36790_at, 36792_at, 36791_g_at	TPM1	tropomyosin 1 (alpha)	15q22.1	7168	Cardiomyopathy, dilated, 1Y,Cardiomyopathy, familial hypertrophic, 3,	hsa04260:Cardiac muscle contraction,hsa05410:Hypertrophic cardiomyopathy (HCM),hsa05414:Dilated cardiomyopathy,
32313_at, 32314_g_at	tpm2	tropomyosin 2 (beta)	9p13.2-p13.1	7169	Arthrogryposis multiplex congenita, distal, type 1,Arthrogryposis, distal, type 2B,Nemaline myopathy,	hsa04260:Cardiac muscle contraction,hsa05410:Hypertrophic cardiomyopathy (HCM),hsa05414:Dilated cardiomyopathy,
41459_at	tpp2	tripeptidyl peptidase II	13q32-q33	7174
32718_at	TPST1	tyrosylprotein sulfotransferase 1	7q11.21	8460
39109_at	Tpx2	TPX2, microtubule-associated, homolog (Xenopus laevis)	20q11.2	22974
140_s_at	TRA2B	transformer 2 beta homolog (Drosophila)	3q26.2-q27	6434	Genome-wide association yields new sequence variants at seven loci that associate with measures of obesity,	hsa03040:Spliceosome,
40051_at	Tram2	translocation associated membrane protein 2	6p21.1-p12	9697
1468_at	Trap1	TNF receptor-associated protein 1	16p13.3	10131
33253_at	Trim14	tripartite motif-containing 14	9q22.33	9830
37126_at	TRIM21	tripartite motif-containing 21	11p15.5	6737		hsa05322:Systemic lupus erythematosus,
1843_at	TRIM27	tripartite motif-containing 27	6p22	5987
33107_at	TRIM37	tripartite motif-containing 37	17q23.2	4591	Mulibrey nanism,	hsa04120:Ubiquitin mediated proteolysis,
40485_at, 40487_at	TRIM44	tripartite motif-containing 44	11p13	54765
40581_at	TRIO	triple functional domain (PTPRF interacting)	5p15.2	7204
36813_at	Trip13	thyroid hormone receptor interactor 13	5p15.33	9319
39341_at	TRIP6	thyroid hormone receptor interactor 6	7q22	7205		hsa04621:NOD-like receptor signaling pathway,
41051_at	Tsnax	translin-associated factor X	1q42.1	7257
34775_at	TSPAN1	tetraspanin 1	1p34.1	10103
38612_at	TSPAN3	tetraspanin 3	15q24.3	10099
33919_at	tspan4	tetraspanin 4	11p15.5	7106
32806_at	tspO	translocator protein (18kDa)	22q13.31	706		hsa04080:Neuroactive ligand-receptor interaction,
40982_at	tsr1	TSR1, 20S rRNA accumulation, homolog (S. cerevisiae)	17p13.3	55720
36936_at	TSTA3	tissue specific transplantation antigen P35B	8q24.3	7264		hsa00051:Fructose and mannose metabolism,hsa00520:Amino sugar and nucleotide sugar metabolism,
40517_at	TTC37	tetratricopeptide repeat domain 37	5q15	9652		hsa03018:RNA degradation,
572_at	ttk	TTK protein kinase	6q13-q21	7272		hsa04110:Cell cycle,
40567_at	TUBA1A	tubulin, alpha 1a	12q12-q14.3	7846	Lissencephaly 3,	hsa04540:Gap junction,hsa05130:Pathogenic Escherichia coli infection,
38353_at	TUBGCP3	tubulin, gamma complex associated protein 3	13q34	10426
36852_at, 36851_g_at	TUSC3	tumor suppressor candidate 3	8p22	7991	?Prostate cancer, susceptibility to,Mental retardation, autosomal recessive 7,	hsa00510:N-Glycan biosynthesis,
1064_at	twf1	twinfilin, actin-binding protein, homolog 1 (Drosophila)	12q12	5756
35007_at	twistnb	TWIST neighbor	7p15.3	221830
36992_at	TXN	thioredoxin	9q31	7295
379_at	txndc9	thioredoxin domain containing 9	2q11.2	10190
37899_at, 1505_at	Tyms	thymidylate synthetase	18p11.32	7298		hsa00240:Pyrimidine metabolism,hsa00670:One carbon pool by folate,
36517_at	u2af1	U2 small nuclear RNA auxiliary factor 1	21q22.3	7307		hsa03040:Spliceosome,
41242_at	UAP1	UDP-N-acteylglucosamine pyrophosphorylase 1	1q23.3	6675		hsa00520:Amino sugar and nucleotide sugar metabolism,
40066_at	uba3	ubiquitin-like modifier activating enzyme 3	3p24.3-p13	9039		hsa04120:Ubiquitin mediated proteolysis,
1651_at	UBE2C	ubiquitin-conjugating enzyme E2C	20q13.12	11065		hsa04120:Ubiquitin mediated proteolysis,
34850_at	Ube2e3	ubiquitin-conjugating enzyme E2E 3 (UBC4/5 homolog, yeast)	2q32.1	10477		hsa04120:Ubiquitin mediated proteolysis,
894_g_at, 40619_at, 893_at	Ube2s	ubiquitin-conjugating enzyme E2S	19q13.43	27338		hsa04120:Ubiquitin mediated proteolysis,
32059_at	UBXN2B	UBX domain protein 2B	8q12.1	137886
37193_at	uck2	uridine-cytidine kinase 2	1q23	7371		hsa00240:Pyrimidine metabolism,hsa00983:Drug metabolism,
35214_at	UGDH	UDP-glucose dehydrogenase	4p15.1	7358		hsa00040:Pentose and glucuronate interconversions,hsa00053:Ascorbate and aldarate metabolism,hsa00500:Starch and sucrose metabolism,hsa00520:Amino sugar and nucleotide sugar metabolism,
37373_at	UGP2	UDP-glucose pyrophosphorylase 2	2p14-p13	7360		hsa00040:Pentose and glucuronate interconversions,hsa00052:Galactose metabolism,hsa00500:Starch and sucrose metabolism,hsa00520:Amino sugar and nucleotide sugar metabolism,
32392_s_at	Ugt1a1 Ugt1a10 Ugt1a3 UGT1A4 Ugt1a5 Ugt1a6 UGT1A7 Ugt1a8 Ugt1a9	UDP glucuronosyltransferase 1 family, polypeptide A3; UDP glucuronosyltransferase 1 family, polypeptide A5; UDP glucuronosyltransferase 1 family, polypeptide A4; UDP glucuronosyltransferase 1 family, polypeptide A7; UDP glucuronosyltransferase 1 family, polypeptide A6; UDP glucuronosyltransferase 1 family, polypeptide A10; UDP glucuronosyltransferase 1 family, polypeptide A9; UDP glucuronosyltran…	2q37	54575 54576 54577 54578 54579 54600 54657 54658 54659	Crigler-Najjar syndrome, type I,Crigler-Najjar syndrome, type II,Gilbert syndrome,Hyperbilirubinemia, familial transcient neonatal,	hsa00040:Pentose and glucuronate interconversions,hsa00053:Ascorbate and aldarate metabolism,hsa00140:Steroid hormone biosynthesis,hsa00150:Androgen and estrogen metabolism,hsa00500:Starch and sucrose metabolism,hsa00830:Retinol metabolism,hsa00860:Porphyrin and chlorophyll metabolism,hsa00980:Metabolism of xenobiotics by cytochrome P450,hsa00982:Drug metabolism,hsa00983:Drug metabolism,
37686_s_at	ung	uracil-DNA glycosylase	12q23-q24.1	7374	Immunodeficiency with hyper IgM, type 4,	hsa03410:Base excision repair,hsa05340:Primary immunodeficiency,
39131_at	upf3a	UPF3 regulator of nonsense transcripts homolog A (yeast)	13q34	65110
283_at	Uqcrc1	ubiquinol-cytochrome c reductase core protein I	3p21.3	7384		hsa00190:Oxidative phosphorylation,hsa04260:Cardiac muscle contraction,hsa05010:Alzheimer's disease,hsa05012:Parkinson's disease,hsa05016:Huntington's disease,
35308_at	URM1	ubiquitin related modifier 1 homolog (S. cerevisiae)	9q34.11	81605
37667_at	Urod	uroporphyrinogen decarboxylase	1p34	7389	Porphyria cutanea tarda,Porphyria, hepatoerythropoietic,	hsa00860:Porphyrin and chlorophyll metabolism,
36653_g_at	UROS	uroporphyrinogen III synthase	10q25.2-q26.3	7390	Porphyria, congenital erythropoietic,	hsa00860:Porphyrin and chlorophyll metabolism,
34383_at	usp1	ubiquitin specific peptidase 1	1p31.3	7398
37683_at	USP10	ubiquitin specific peptidase 10	16q24.1	9100	Many sequence variants affecting diversity of adult human height,
36982_at	USP14	ubiquitin specific peptidase 14 (tRNA-guanine transglycosylase)	18p11.32	9097
33219_at	usp33	ubiquitin specific peptidase 33	1p31.1	23032
35885_at	USP9Y	ubiquitin specific peptidase 9, Y-linked	Yq11.2	8287	Azoospermia,
41859_at	Ust	uronyl-2-sulfotransferase	6q25.1	10090		hsa00532:Chondroitin sulfate biosynthesis,
41824_at	utp18	UTP18, small subunit (SSU) processome component, homolog (yeast)	17q21.33	51096
35783_at	vamp3	vesicle-associated membrane protein 3 (cellubrevin)	1p36.23	9341		hsa04130:SNARE interactions in vesicular transport,
40414_at	vars	valyl-tRNA synthetase	6p21.3	7407		hsa00290:Valine, leucine and isoleucine biosynthesis,hsa00970:Aminoacyl-tRNA biosynthesis,
171_at	vbp1	von Hippel-Lindau binding protein 1	Xq28	7411
36601_at	vcl	vinculin	10q22.2	7414	Cardiomyopathy, dilated, 1W,	hsa04510:Focal adhesion,hsa04520:Adherens junction,hsa04670:Leukocyte transendothelial migration,hsa04810:Regulation of actin cytoskeleton,
40198_at	VDAC1 VDAC1P1	voltage-dependent anion channel 1; similar to voltage-dependent anion channel 1	5q31 Xq21.1	642585 7416		hsa04020:Calcium signaling pathway,hsa05012:Parkinson's disease,hsa05016:Huntington's disease,
36102_at	VDAC3	voltage-dependent anion channel 3	8p11.2	7419		hsa04020:Calcium signaling pathway,hsa05012:Parkinson's disease,hsa05016:Huntington's disease,
1388_g_at	VDR	vitamin D (1,25- dihydroxyvitamin D3) receptor	12q13.11	7421	?Osteoporosis, involutional,Rickets, vitamin D-resistant, type IIA,Rickets, vitamin D-resistant, type IIB,
1934_s_at, 159_at	VEGFC	vascular endothelial growth factor C	4q34.1-q34.3	7424		hsa04060:Cytokine-cytokine receptor interaction,hsa04150:mTOR signaling pathway,hsa04510:Focal adhesion,hsa05200:Pathways in cancer,hsa05211:Renal cell carcinoma,hsa05212:Pancreatic cancer,hsa05219:Bladder cancer,
350_at, 32628_at	vezf1	vascular endothelial zinc finger 1	17q22	7716
34091_s_at	VIM	vimentin	10p13	7431
39980_at	VRK1	vaccinia related kinase 1	14q32	7443
37190_at	WASF1	WAS protein family, member 1	6q21-q22	8936		hsa04520:Adherens junction,hsa04666:Fc gamma R-mediated phagocytosis,hsa04810:Regulation of actin cytoskeleton,
38736_at	wdr1	WD repeat domain 1	4p16.1	9948	Association of a common nonsynonymous variant in GLUT9 with serum uric acid levels in old order amish,Genome-wide association study identifies genes for biomarkers of cardiovascular disease: serum urate and dyslipidemia,
35983_at	wdr18	WD repeat domain 18	19p13.3	57418
38250_at	WDR43	WD repeat domain 43	2p23.2	23160
35720_at	WDR47	WD repeat domain 47	1p13.3	22911
32777_at	Wrb	tryptophan rich basic protein	21q22.3	7485
40167_s_at	Wsb2	WD repeat and SOCS box-containing 2	12q24.23	55884
784_g_at, 783_at	WWP1	WW domain containing E3 ubiquitin protein ligase 1	8q21	11059		hsa04120:Ubiquitin mediated proteolysis,hsa04144:Endocytosis,
1873_at	XPC	xeroderma pigmentosum, complementation group C	3p25	7508	Xeroderma pigmentosum, group C,	hsa03420:Nucleotide excision repair,
35305_at	XPNPEP1	X-prolyl aminopeptidase (aminopeptidase P) 1, soluble	10q25.3	7511
37729_at	xpo1	exportin 1 (CRM1 homolog, yeast)	2p16	7514
585_at, 2093_s_at, 584_s_at, 38733_at	XRCC5	X-ray repair complementing defective repair in Chinese hamster cells 5 (double-strand-break rejoining)	2q35	7520		hsa03450:Non-homologous end-joining,
38977_at	Yars	tyrosyl-tRNA synthetase	1p35.1	8565	Charcot-Marie-Tooth disease, dominant intermediate C,	hsa00970:Aminoacyl-tRNA biosynthesis,
32340_s_at	ybx1	Y box binding protein 1	1p34	4904
32324_at	YWHAB	tyrosine 3-monooxygenase/tryptophan 5-monooxygenase activation protein, beta polypeptide	20q13.1	7529		hsa04110:Cell cycle,hsa04114:Oocyte meiosis,hsa04722:Neurotrophin signaling pathway,
1424_s_at	YWHAH	tyrosine 3-monooxygenase/tryptophan 5-monooxygenase activation protein, eta polypeptide	22q12.3	7533		hsa04110:Cell cycle,hsa04114:Oocyte meiosis,hsa04722:Neurotrophin signaling pathway,
40859_at	Zc3h14	zinc finger CCCH-type containing 14	14q31.3	79882
35750_at	ZC3H15	zinc finger CCCH-type containing 15	2q32.1	55854
41669_at	ZCCHC11	zinc finger, CCHC domain containing 11	1p32.3	23318
35973_at	ZDHHC17	zinc finger, DHHC-type containing 17	12q21.2	23390
35184_at	Zfc3h1	zinc finger, C3H1-type containing	12q21.1	196441
32588_s_at	ZFP36L2	zinc finger protein 36, C3H type-like 2	2p22.3-p21	678
40610_at	zfr	zinc finger RNA binding protein	5p13.3	51663
33865_at	zmynd11	zinc finger, MYND domain containing 11	10p14	10771
36928_at	ZNF146	zinc finger protein 146	19q13.1	7705
31633_g_at	ZNF259P1	zinc finger protein 259, pseudogene	6q21	442240
40709_at	ZNF271	zinc finger protein 271	18q12	10778
36048_at	ZNF318	zinc finger protein 318	6pter-p12.1	24149
37520_at	ZNF330	zinc finger protein 330	4q31.1 4q31.1|4q31.1-q31.2	27309
41083_at, 41084_at	ZNF428	zinc finger protein 428	19q13.31	126299
40811_at	ZNF451	zinc finger protein 451	6p12.1	26036
38640_at	znf593	zinc finger protein 593	1p36.11	51042
35995_at	ZWINT	ZW10 interactor	10q21-q22	11130
36958_at	ZYX	zyxin	7q32	7791		hsa04510:Focal adhesion,
36456_at	ZZZ3	zinc finger, ZZ-type containing 3	1p31.1	26009
