# Supplementary material for: Keratinocyte Detachment-Differentiation Connection Revisited, or Anoikis-Pityriasi Nexus Redux
Source: PLoS One. 2014 Jun 24;9(6):e100279. doi: 10.1371/journal.pone.0100279 (PMC4069014; doi:10.1371/journal.pone.0100279)
Supplement: Table S5 — Splicing, melanosomal and mitochondrial genes overexpressed in attached keratinocytes. (XLSX) [file pone.0100279.s005.xlsx]

## Sheet: Sheet1
Splicing		Melanosome		Mitochondria
CUG triplet repeat, RNA binding protein 1		adenosylhomocysteinase		13kDa (NADH-coenzyme Q reductase)
DEAD (Asp-Glu-Ala-Asp) box polypeptide 1		annexin A11		15kDa (NADH-coenzyme Q reductase)
DEAH (Asp-Glu-Ala-His) box polypeptide 9		annexin A2		18kDa (NADH-coenzyme Q reductase)
FUS interacting protein (serine/arginine-rich) 1		annexin A6		3-oxoacid CoA transferase 1
HLA-B associated transcript 1		ATPase, Na+/K+ transporting, beta 3		49kDa (NADH-coenzyme Q reductase)
LSM2 homolog, U6 small nuclear RNA associated		basigin (Ok blood group)		75kDa (NADH-coenzyme Q reductase)
LSM7 homolog, U6 small nuclear RNA associated		calnexin		acyl-CoA synthetase long-chain family member 3
PRP3 pre-mRNA processing factor 3 homolog		calumenin		acyl-CoA synthetase long-chain family member 4
PRP4 pre-mRNA processing factor 4 homolog		capping protein (actin filament), gelsolin-like		acyl-Coenzyme A dehydrogenase, C-4 to C-12
U2 small nuclear RNA auxiliary factor 1		endoplasmic reticulum protein 29		adenylate kinase 2
Y box binding protein 1		fatty acid synthase		ADP-ribosylation factor-like 2 binding protein
chloride channel, nucleotide-sensitive, 1A		glucosidase, alpha; neutral AB		aldehyde dehydrogenase 2 family (mitochondrial)
cleavage stimulation factor, 3' pre-RNA, subunit 2		heat shock 70kDa protein 8		aldehyde dehydrogenase 3 family, member A2
heterogeneous nuclear ribonucleoprotein A0		heat shock protein 90kDa alpha, class A		aldehyde dehydrogenase 4 family, member A1
heterogeneous nuclear ribonucleoprotein A1-like 3		heat shock protein 90kDa alpha, class B		apoptosis-inducing, mitochondrion-associated, 1
heterogeneous nuclear ribonucleoprotein A2/B1		heat shock protein 90kDa beta (Grp94)		ATP synthase, H+ transporting, subunit C1
heterogeneous nuclear ribonucleoprotein A3		heat shock 70kDa protein 5		ATP synthase, H+ transporting, subunit C3
heterogeneous nuclear ribonucleoprotein C (C1/C2)		integrin, beta 1		ATP synthase, H+ transporting, subunit E
heterogeneous nuclear ribonucleoprotein H1 (H)		nucleosome assembly protein 1-like 1		ATP synthase, H+ transporting, subunit F2
heterogeneous nuclear ribonucleoprotein K		peptidylprolyl isomerase B (cyclophilin B)		ATP synthase, H+ transporting, subunit G
heterogeneous nuclear ribonucleoprotein M		protein disulfide isomerase family A, member 3		ATP synthase, H+ transporting, alpha subunit 1
heterogeneous nuclear ribonucleoprotein R		protein disulfide isomerase family A, member 4		ATP synthase, H+ transporting, gamma 1
heterogeneous nuclear ribonucleoprotein U		protein disulfide isomerase family A, member 6		ATP synthase, H+ transporting, mitochondrial F1
small nuclear ribonucleoprotein polypeptide G		RAN, member RAS oncogene family		BCL2-associated X protein
mago-nashi homolog, proliferation-associated		solute carrier family 1, member 4		BCS1-like (yeast)
muscleblind-like		solute carrier family 1, member 5		branched chain keto acid dehydrogenase E1, beta
nuclear cap binding protein subunit 2, 20kDa		staphylococcal nuclease 1		carbonyl reductase 4
nudix motif 21		stomatin		caspase 7, apoptosis-related cysteine peptidase
polymerase (RNA) II (DNA directed) polypeptide D		synaptophysin-like 1		CDP-diacylglycerol synthase 2
polymerase (RNA) II (DNA directed) polypeptide G		syndecan binding protein (syntenin)		complement component 1, q binding protein
polymerase (RNA) II (DNA directed) polypeptide H		transferrin receptor (p90, CD71)		creatine kinase, mitochondrial 1A
serine/arginine repetitive matrix 1		transmembrane emp24-like trafficking protein 10		cytochrome b5 reductase 3
RNA binding motif protein, X-linked		tyrosine 3/tryptophan 5-monooxygenase		cytochrome b5 type B (outer mitochondrial memb.)
small nuclear ribonucleoprotein 200kDa (U5)				cytochrome c oxidase subunit Vb
RNA binding protein S1, serine-rich domain				cytochrome c oxidase subunit VIa polypeptide 1
small nuclear ribonucleoprotein 40kDa (U5)				cytochrome c oxidase subunit VIIa polypeptide 2
small nuclear ribonucleoprotein 70kDa (U1)				cytochrome c oxidase subunit VIIa polypeptide 2
small nuclear ribonucleoprotein D2 polypeptide				cytochrome c, somatic
small nuclear ribonucleoprotein polypeptide A				cytochrome c-1
small nuclear ribonucleoprotein polypeptide E				cytochrome P450, family 27,
small nuclear ribonucleoprotein polypeptide F				dihydrolipoamide dehydrogenase
small nuclear ribonucleoprotein polypeptides B, B1				dihydrolipoamide S-succinyltransferase
splicing factor 3a, subunit 3, 60kDa				dynamin 1-like
splicing factor 3b, subunit 2, 145kDa				electron-transfer-flavoprotein, alpha polypeptide
splicing factor, arginine/serine-rich 1				ethylmalonic encephalopathy 1
splicing factor, arginine/serine-rich 2				fumarate hydratase
splicing factor, arginine/serine-rich 3				glutamate dehydrogenase 1
splicing factor, arginine/serine-rich 7, 35kDa				glutamate dehydrogenase 2
structural maintenance of chromosomes 1A				glutamic-oxaloacetic transaminase 2, mitochondrial
survival of motor neuron 1, 2				heat shock 10kDa protein 1 (chaperonin 10)
transformer 2 beta homolog				heat shock 60kDa protein 1 (chaperonin)
				hydroxyacyl-Coenzyme A dehydrogenase
				inner membrane protein, mitochondrial (mitofilin)
				isoleucyl-tRNA synthetase 2, mitochondrial
				leucine-rich PPR-motif containing
				leucyl-tRNA synthetase 2, mitochondrial
				lysyl-tRNA synthetase
				metaxin 2
				mitochondrial intermediate peptidase
Suplement Table 5				mitochondrial ribosomal protein L12
Overexpressed in attached keratinocytes				mitochondrial ribosomal protein L23
				mitochondrial ribosomal protein L28
				mitochondrial ribosomal protein L3
				mitochondrial ribosomal protein L40
				mitochondrial ribosomal protein L9
				mitochondrial ribosomal protein S12
				mitochondrial ribosomal protein S18B
				mitofusin 2
				MpV17 mitochondrial inner membrane protein
				NADH dehydrogenase (ubiquinone) 1
				NADH dehydrogenase (ubiquinone) 1 alpha
				NADH dehydrogenase (ubiquinone) 1 alpha 5
				NADH dehydrogenase (ubiquinone) 1 alpha factor 3
				NADH dehydrogenase (ubiquinone) 1, alpha/beta
				NADH dehydrogenase (ubiquinone) flavoprotein 1
				NADH dehydrogenase (ubiquinone) flavoprotein 2
				nicotinamide nucleotide transhydrogenase
				nipsnap homolog 1 (C. elegans)
				non-metastatic cells 4, protein expressed in
				ornithine aminotransferase (gyrate atrophy)
				oxidase (cytochrome c) assembly 1-like
				prohibitin 2
				propionyl Coenzyme A carboxylase, beta
				pyruvate carboxylase
				serine hydroxymethyltransferase 2 (mitochondrial)
				SH3-domain GRB2-like endophilin B1
				single-stranded DNA binding protein 1
				SLIT-ROBO Rho GTPase activating protein 2
				solute carrier family 25, member 1
				solute carrier family 25, member 3
				solute carrier family 25, member 36
				solute carrier family 25, member 4
				sorting and assembly machinery component 50
				stomatin (EPB72)-like 2
				succinate dehydrogenase complex, subunit A
				succinate dehydrogenase complex, subunit B
				succinate-CoA ligase, GDP-forming, beta subunit
				superoxide dismutase 1, soluble
				transcription factor A, mitochondrial
				translocase of inner mitochondrial membrane 17
				translocase of outer mitochondrial membrane 20
				translocase of outer mitochondrial membrane 34
				translocase of outer mitochondrial membrane 40
				translocase of outer mitochondrial membrane 70
				translocator protein (18kDa)
				ubiquinol-cytochrome c reductase core protein I
				voltage-dependent anion channel 1
				voltage-dependent anion channel 3
				WAS protein family, member 1
